# Supplementary material
Source: publisher figshare collection journal article supplement (https://diabetesjournals.figshare.com/articles/dataset/_/20425617)
Supplement: Supplementary file 1 [file 1]

## Sheet: Summary
Data source
OIO model (this study)
Proliferating beta cells. Klochender et al., 2016 (obtained from authors)
Islets from S961 treated mice (2-day treatment). Dumanye et al., 2020 GSE137187
Islets from pregnant females (9.5-day, wt mice). Goyvaerts et al., 2015 GSE59141
Islets from HFD-fed mice (10-day HFD, C57Bl/6J). Cruciani-Guglielmacci et al., 2017 GSE78183
A-ranked lists
Ranked lists used for GSEA-Prerranked http://gsea-msigdb.org
After differential gene expression analysis (DEG), all genes were ranked by logFC
B-gene sets
After DEG analysis, only genes with TPM > 0.5, Adj.Pval < 0.05, logFC > 0.5 were further considered to build gene sets
Top 100 upregulated genes from proliferating beta cells were used for GSEA
Top 50 upregulated genes from S961/HFD/pregnancy studies were used for GSEA
C-OIO up
After DEG analysis, only genes with TPM > 0.5, Adj.Pval < 0.05 were further considered
Top 250 upregulated genes (#250 logFC=0.92), were used for transcription factor enrichment analysis

## Sheet: A-Ranked lists
OIO ranked list		Proliferating beta cells		S961		Pregnancy		HFD
#Gene_symbol	logFc	#Gene_symbol	logFc	#Gene_symbol	logFc	#genesymbol	logFC	#Gene_symbol	logFc
Cd19	3.18255	Xkr5	9.04064	Mc5r	1.60436	Tph1	6.6	Reg2	3.57464
Glycam1	3.17643	C330021F23Rik	8.52306	Gm35279	1.53914	Cldn8	6.09	Reg3b	3.34767
Gm5771	3.06818	Smtn	8.29606	Slc25a31	1.36372	Sftpd	5.37	Cyp26b1	2.04289
Cr2	3.04152	Iqgap3	8.28924	Hmmr	1.33435	Tph2	4.22	Slc15a2	1.47281
Ms4a1	2.95426	Arhgef39	8.18943	Gm15446	1.33116	Esr1	4.22	Angptl4	1.43296
Ccr6	2.8873	Ska1	8.15167	Knl1	1.27837	Fn1	4.14	Reg3d	1.39302
H2-Eb2	2.66752	Ybx2	8.07258	Kif4	1.26946	Slc5a9	4.12	Eps8l1	1.37794
Lrr1	2.61904	Troap	8.02954	Clca3a2	1.21076	Cdca8	4.1	Slpi	1.33099
Pif1	2.59089	Aspn	7.85663	Kbtbd6	1.13061	Gbp8	4.08	Upk3b	1.19519
Ltf	2.58208	Ube2c	7.8362	Exo1	1.11499	4833427G06Rik	4.04	Adcy1	0.938621
Treml4	2.49095	Clgn	7.80658	Mki67	1.10128	Gm15577	4.03	Cpt1a	0.918555
Mcoln2	2.45663	Aurkb	7.67376	Xlr4a	1.07223	Neb	3.93	Inhbb	0.904016
Tnfrsf13c	2.4297	Plk1	7.66299	Gm3776	1.02588	Gsg2	3.84	Nr4a1	0.846197
Mzb1	2.40783	Neil3	7.59026	4930578N18Rik	1.01485	Esco2	3.82	Gem	0.779757
Fanca	2.39172	Kif18b	7.5731	Gm42427	1.00587	Xpa	3.81	Rgn	0.777541
Pou2af1	2.3824	Ankle1	7.53249	Ttk	0.997675	Vmn1r11	3.74	Pdk4	0.775062
Cdc25c	2.38234	Casc5	7.48425	Crisp2	0.987194	Nlrc3	3.73	Hmgcs2	0.773861
Fscn2	2.37503	Cdk1	7.4134	Ccdc18	0.983954	C77405	3.69	Syce1	0.725927
Ngp	2.34871	Espl1	7.39763	1700003M07Rik	0.961811	Dtl	3.66	Cd36	0.711839
Slpi	2.31425	Top2a	7.37661	Ckap2l	0.95519	5430427N15Rik	3.66	Vsnl1	0.711427
Cyp26b1	2.26172	Esco2	7.35948	Sod3	0.942564	Krtap13-1	3.66	Cxcl13	0.710061
Ccnb1	2.17041	Bub1b	7.33481	Lsmem1	0.939799	Pnrc1	3.62	Fabp4	0.697072
2810408I11Rik	2.1345	Hmmr	7.27503	Ccdc85a	0.937933	Zcchc13	3.59	Rgs2	0.674619
Zbtb32	2.13013	Fam64a	7.26005	Ccnb2	0.935681	Bst1	3.58	Npas4	0.651307
Ticrr	2.12329	Kif4	7.25857	Gm43457	0.931387	Hormad1	3.57	Igj	0.639361
Cd79b	2.11997	Nusap1	7.20683	Fbxw24	0.925033	Gm11266	3.53	BB019430	0.630342
Cenpi	2.11697	BC030867	7.19859	Gabrp	0.920341	Fmo1	3.51	Otof	0.615035
Rorc	2.11657	Pkn3	7.16766	Morc1	0.903505	Tbx21	3.51	Cish	0.590054
Dscc1	2.07733	Bub1	7.16608	Cenpf	0.901298	Ces5a	3.5	Rad51ap2	0.582068
Eme1	2.06953	Ccnb1	7.15832	Csmd3	0.892021	Slc25a31	3.41	Svopl	0.577939
Saa3	2.05553	Mxd3	7.15481	1810026B05Rik	0.891435	Rnf10	3.39	Mir682	0.56898
Uhrf1	2.05271	Fbxo48	7.1213	Aspm	0.87884	Klk1b16	3.34	Gadd45b	0.567761
Cxcl13	2.04446	Kif14	7.10417	Gm5148	0.871763	Ccdc39	3.32	Aqp7	0.564424
H2-DMb2	2.03841	Gtse1	7.05708	Sgo2a	0.851584	3300002I10Rik	3.3	Cenpe	0.561285
Pdcd1	2.02966	Cdca8	7.04164	Arhgap15	0.846564	Trip13	3.29	Pthlh	0.56003
Reg3a	2.02957	Cenpf	7.03976	Kif11	0.8357	Prl3c1	3.23	AF529169	0.556379
Kif2c	2.02045	Melk	7.01937	Tph1	0.826993	5430439C14Rik	3.21	Edn3	0.551037
Cxcr5	2.01928	Arhgap19	7.01375	Cenpe	0.81678	4921504P05Rik	3.18	Upp2	0.54697
Lingo4	1.98902	Cdc25c	6.951	4930506C21Rik	0.807672	Eif2s3y	3.16	Tacc2	0.542171
Orc1	1.98437	Fancd2	6.92408	Tpx2	0.805944	Vmn1r29	3.16	Ghrl	0.52732
Pole	1.97706	Sez6	6.92014	Clec12b	0.805801	Dcdc2c	3.16	Zdhhc22	0.523417
Cenph	1.94416	Pbk	6.91421	C4b	0.801817	1500009C09Rik	3.15	Pth1r	0.518719
Mcm5	1.93426	Cenpe	6.91155	Gm47392	0.800601	Tlr7	3.14	Neto2	0.51269
Prss3	1.93355	Cdc20	6.87985	Nek2	0.791829	Mgst1	3.08	Myc	0.511589
Mfi2	1.9326	Shcbp1	6.87464	Gm6444	0.78764	Akr1c20	3.06	Nfkbiz	0.508781
Fcrla	1.91917	Anln	6.85628	Tlr8	0.787535	Spic	3.06	4921507P07Rik	0.497882
Cenpe	1.90725	Cenpi	6.84111	Top2a	0.777854	Tk1	3.06	Acaa2	0.495136
Hsh2d	1.90547	Clhc1	6.81523	Gm48857	0.777313	Tnfrsf11b	3.05	Dbp	0.493362
2810417H13Rik	1.8937	Chtf18	6.80105	Gm45051	0.77479	Vrtn	3.05	Rgs4	0.491693
Exo1	1.88783	Kif23	6.79127	4930563E18Rik	0.771899	Add2	3.05	Klhl38	0.491519
Slfn9	1.8869	Pif1	6.78794	Fignl1	0.76779	Usp50	3.04	Cyp1b1	0.488459
Fcer2a	1.87968	Ndc80	6.78213	5430425K12Rik	0.76749	Hao1	3.04	Wbscr27	0.486393
Nek2	1.87562	Sapcd2	6.77456	Chil6	0.766814	5830487K18Rik	3.03	3425401B19Rik	0.483926
Blk	1.86429	Kifc1	6.7713	Fanci	0.763047	Txn1	3.03	Samd5	0.47781
Cdc6	1.8633	Cdca3	6.7693	Bst1	0.761426	Stk31	3.03	Myo7b	0.469417
Gtse1	1.85477	Birc5	6.73545	Neil3	0.760904	6430710M23Rik	3.01	Tcp11	0.469081
Serpina3f	1.84981	Ckap2	6.72535	Cyp1b1	0.75505	Kcnk10	3.01	4930452B06Rik	0.468164
Aurkb	1.84661	Aspm	6.71897	Parpbp	0.75223	Dnajc17	2.99	Itpka	0.467185
Mcm10	1.83929	Tpx2	6.71757	Ccna2	0.746487	Itgb1	2.99	Xrra1	0.464406
Wfdc18	1.82807	Ccdc18	6.69348	Cldn1	0.739487	Murc	2.98	Ndst4	0.463744
Slc15a2	1.81801	Ckap2l	6.66512	Xlr	0.735346	Cym	2.97	Dsn1	0.459979
Hells	1.81346	Cdca5	6.65761	Gm29395	0.716804	Slfn9	2.97	Gpr68	0.453847
Dtl	1.80152	D330045A20Rik	6.65592	Ckap2	0.714845	F9	2.97	Neil3	0.448702
Rmi2	1.79373	Kif11	6.64811	Ube2c	0.711625	D9Ertd496e	2.92	Gpr161	0.448082
Spib	1.79293	Nek2	6.60767	Gm36447	0.707345	1700072H12Rik	2.91	Rhebl1	0.446285
Ube2c	1.79243	Ncaph	6.60737	Clec5a	0.704554	Il12b	2.9	Rgs8	0.442238
Hmmr	1.78123	Cenpa	6.59148	Gm20537	0.703685	Vav2	2.89	Ccdc113	0.439413
Fignl1	1.76737	Depdc1a	6.58707	Gm16401	0.700964	Dnajc6	2.88	Ang	0.438565
Kif18b	1.76665	Ccna1	6.58684	Ccnb1	0.698484	Gm19500	2.88	Ccnb2	0.437914
Faim3	1.76587	Kif2c	6.55013	Knstrn	0.694594	F11r	2.87	Nlgn1	0.434164
Ccr7	1.76261	Spag5	6.54182	Maf	0.694087	Dsc1	2.87	Pyy	0.433914
Rad54b	1.74215	Ccnb2	6.54044	Pcolce	0.686294	Egfbp2	2.87	Zfp541	0.432615
Gins1	1.73757	Ccna2	6.50856	Gm15983	0.678567	Tmem125	2.81	Irf7	0.431948
Knstrn	1.72386	Mki67	6.48352	Brip1	0.678112	Sapcd2	2.8	Slc25a20	0.43018
Lcn2	1.71945	Gsg2	6.47351	Gm30091	0.676555	Aurkb	2.8	Klhl14	0.428988
Kif14	1.7169	Cdca2	6.46941	Gas2l3	0.67393	5730420D15Rik	2.8	1810034E14Rik	0.425923
Pax5	1.71306	Stmn1	6.45535	4933424L21Rik	0.667839	Arhgef39	2.8	Syt16	0.421113
Ly6c2	1.71169	E2f8	6.41171	Kif23	0.666042	4930558K02Rik	2.79	4430402I18Rik	0.421021
Ankle1	1.70798	Cep55	6.40802	Kcnn4	0.661403	Dmrt2	2.79	Abca1	0.415216
Derl3	1.70263	Cxcr4	6.40597	Dtl	0.657276	Sde2	2.79	Relb	0.414179
Sapcd2	1.69163	Cks2	6.38085	Snx8	0.65661	Cab39l	2.78	Zfand4	0.413725
Ccl22	1.68876	Foxm1	6.37078	Grik2	0.650134	Rxfp1	2.78	4931429I11Rik	0.413429
Treml2	1.68759	Mis18bp1	6.35681	1700095J03Rik	0.64975	Adra1a	2.76	Gabra4	0.412592
Pdyn	1.68739	Dlgap5	6.336	Uhrf1	0.639468	Psen1	2.75	Gpm6a	0.408178
Gimap7	1.68448	Sgol1	6.32851	Rac2	0.639276	Mme	2.74	Mmp12	0.407197
Cdk1	1.67996	Ercc6l	6.31266	Oip5	0.638724	Matn2	2.73	Hlx	0.406413
Gins2	1.67434	Lrr1	6.29878	Ikzf1	0.63799	AA517858	2.73	Mfi2	0.405111
Siglecg	1.66584	Oip5	6.27359	Gm39327	0.635486	Coq10a	2.73	Nr1d2	0.404002
Cdca5	1.6563	Kif20b	6.26908	Gm26885	0.632968	Birc5	2.73	Selp	0.402131
Fanci	1.6548	Slc9a5	6.26422	Gm11966	0.631536	Gli2	2.72	Abca4	0.40145
Rad51	1.63726	Spc24	6.24059	Sgcd	0.626921	Fam171a2	2.71	Rpl18a	0.40097
Troap	1.63121	Rbm44	6.24052	Gm31557	0.620203	Fanci	2.7	Cebpd	0.40081
Npas2	1.62928	Ect2	6.2168	4930524O08Rik	0.61906	1700031F10Rik	2.69	Gpr119	0.400122
Casc5	1.62866	Stil	6.20825	Synpo2	0.616517	2310011E23Rik	2.69	5330437I02Rik	0.399868
Fam64a	1.62344	Rad51l1	6.20611	Igfbp4	0.615834	Depdc1b	2.69	Calml3	0.399303
Ckap2l	1.62	Col2a1	6.18498	4930509E16Rik	0.615272	Myh1	2.69	BC051070	0.398935
Ncapg	1.61147	Sgol2	6.17333	Gas1	0.610551	9030407C09Rik	2.69	Errfi1	0.39889
Ercc6l	1.61094	Traip	6.14525	Scimp	0.609489	D230021J17Rik	2.68	A1cf	0.397609
Top2a	1.60786	Asf1b	6.13799	Nusap1	0.607188	Akap10	2.68	Fam179a	0.396649
Aicda	1.60146	Rad51ap1	6.12843	AC113595.1	0.60708	Clec4g	2.68	Pou3f4	0.39328
Ckap2	1.59948	Ska3	6.03248	Cdkn3	0.604624	Gm10658	2.67	Slc29a2	0.393168
Cdc20	1.598	Poln	6.02986	Melk	0.600854	Tlr4	2.67	Gatm	0.390646
Serpina3h	1.58633	Prc1	6.01825	Gm32200	0.59555	4930563J15Rik	2.67	Sycn	0.387164
Mcm3	1.58529	Clspn	6.00961	Gm12762	0.59458	Lgr4	2.66	Hgf	0.385674
Bub1	1.57929	Nuf2	6.00729	BC022960	0.594264	2410089E03Rik	2.66	Ckap2	0.385355
Rad54l	1.57846	Ildr2	6.00346	Mis18bp1	0.594213	4930513O06Rik	2.64	Lrrc23	0.384155
Cdkn3	1.57817	Parpbp	5.96348	Trim38	0.5913	7630403G23Rik	2.63	Cib3	0.381934
Mxd3	1.5712	Ube2t	5.95874	Cd244a	0.58934	4933437F24Rik	2.63	Fam46a	0.381018
Dlgap5	1.5676	Mtfr2	5.94209	Gm31992	0.588047	Capza3	2.62	Slc40a1	0.380421
Tpx2	1.56374	Ttk	5.92057	Gm38944	0.587348	Bub1b	2.61	Gm6787	0.377146
Ncaph	1.56199	Gas2l3	5.88412	Dnajb6-ps	0.586845	Mtf2	2.61	Rnase4	0.37664
Mki67	1.56118	Chek2	5.84202	2900045O20Rik	0.577786	Sval2	2.6	Cd59a	0.376431
Irg1	1.56113	Fanci	5.7734	Tnfrsf19	0.575357	Ibtk	2.59	Rpl21	0.374249
Clspn	1.54979	Incenp	5.75365	Shcbp1	0.572398	Ighm	2.59	Gpx2	0.370072
BC030867	1.54318	Fignl1	5.74921	D7Ertd128e	0.569028	Tab1	2.58	8430408G22Rik	0.369786
Birc5	1.54123	Ifit2	5.73808	Gm40999	0.565553	4930408K08Rik	2.58	Frem2	0.367525
Kif4	1.53487	Rad54b	5.73611	Fap	0.563571	1700031L13Rik	2.58	Rwdd2a	0.366499
Bank1	1.51661	Kif22	5.71833	Cd33	0.560475	Slc25a30	2.57	Ramp1	0.363566
Cenpa	1.50998	Cdkn3	5.70629	Gm44751	0.556798	Rhoh	2.57	Itih2	0.363244
Brca1	1.50786	Trip13	5.70259	A830005F24Rik	0.555866	E230016K23Rik	2.57	Cpne5	0.363011
Cdca8	1.50319	Mlf1ip	5.70074	Mylk	0.554589	4933411O13Rik	2.57	Steap1	0.362681
Sell	1.50114	Omd	5.69401	Gm13093	0.550351	Iqub	2.57	Adam5	0.3611
Itk	1.49074	Syngr4	5.67868	Suv39h2	0.549824	T	2.56	Csgalnact1	0.360524
Cks2	1.4884	Ogn	5.67699	Gm30531	0.548215	BC002059	2.56	Tmc8	0.360413
Pglyrp1	1.48544	Brip1	5.67256	Cdk5rap1	0.547827	Krt83	2.56	Rtkn2	0.358823
Zbtbd6	1.48108	Efcab11	5.64043	Gm29103	0.547606	Bsn	2.56	Rasd2	0.35862
Arhgef39	1.48027	Ncapg	5.62965	Gm50322	0.543236	Trdn	2.56	Pcdhb13	0.356675
Fam132b	1.47729	Bard1	5.61586	Impg2	0.542711	2700099C18Rik	2.55	Abcc12	0.35397
Ccnb2	1.47393	Ccnf	5.60755	Aass	0.536484	4933402E13Rik	2.54	Vangl2	0.353943
Fbxo48	1.47125	Psrc1	5.60637	Dnah9	0.536098	En1	2.54	Ror1	0.353785
Shmt1	1.47061	Prr11	5.60131	Cd48	0.535476	Apol11b	2.54	Nxph1	0.353408
Melk	1.46974	Paf	5.58119	Tnf	0.533442	C430039J16Rik	2.53	Tpx2	0.352502
Serpina3j	1.46826	Knstrn	5.58033	Cdc6	0.532351	3110080E11Rik	2.53	Hhatl	0.351904
Shcbp1	1.4668	4930579G24Rik	5.58031	Zfp977	0.531436	Nme8	2.52	Itih1	0.349817
Cenpf	1.46615	Exo1	5.56092	Rpl7-ps7	0.529863	Dirc2	2.52	Car7	0.347667
Hist1h1d	1.46035	Nsl1	5.52872	Stab2	0.529585	Tyms	2.52	Rpl13	0.345142
Fkbp11	1.45949	Chaf1a	5.51508	Bub1	0.525954	Limk1	2.51	Stc1	0.344555
Psrc1	1.45261	Kif18a	5.51077	Clec12a	0.525177	2610316D01Rik	2.5	Spon2	0.343701
D430020J02Rik	1.43361	Cenpw	5.49174	Ect2	0.524866	Mettl11b	2.5	2310007L24Rik	0.342707
Kntc1	1.427	Ticrr	5.48255	Gm21973	0.523905	Ptpru	2.49	Btnl9	0.342296
Esco2	1.41748	Nfib	5.46459	Egln3	0.522356	Uty	2.49	Txnrd3	0.342161
Nuf2	1.41699	D17H6S56E-5	5.44977	Ercc6l	0.522158	Gabra3	2.49	Uox	0.341661
Aspm	1.41371	Cep72	5.44812	Gm12844	0.521883	Cst8	2.49	Chtf18	0.340922
Tk1	1.41113	Palb2	5.42879	Glipr1	0.517316	Arhgap20	2.48	St8sia1	0.338415
Tcf19	1.40755	Cenpl	5.4243	Gm10371	0.516633	Pole	2.47	Kcnn3	0.3373
Gsg2	1.40443	Diap3	5.4229	Jchain	0.516355	Ep400	2.46	Cldn15	0.336971
Ttyh1	1.39964	Nrm	5.42036	Olfr1033	0.512837	Chtf18	2.46	Fhod3	0.336796
Gpx2	1.39008	Ccdc99	5.39612	Gm28374	0.512478	C030023E24Rik	2.46	Ace2	0.336624
Plk1	1.39005	Chst1	5.3937	Gm47962	0.511194	4933400A11Rik	2.46	4930588N13Rik	0.336211
Asf1b	1.38186	Myb	5.3915	Pbk	0.508321	Mdm2	2.45	Cmya5	0.336001
Angptl4	1.3717	Dsn1	5.38613	Pde11a	0.505826	Tepp	2.45	C330027C09Rik	0.335707
Ect2	1.37103	Cenpm	5.36789	Cks2	0.502472	Mela	2.43	Gpa33	0.33553
Ovol2	1.36592	Rad51	5.36747	4930593A02Rik	0.501366	Abl2	2.42	Rasgrf2	0.335367
Ttk	1.36079	Kifc5b	5.34488	Gm26714	0.495339	BB163080	2.42	Elmod1	0.332985
Pbk	1.36052	Smc2	5.34114	Msr1	0.494778	Pde6b	2.42	Brip1	0.332867
E2f8	1.3591	Naaladl1	5.33381	Gm45889	0.49457	Pts	2.42	Cited2	0.33197
Ppp1r3c	1.35861	Mybl1	5.3255	Clca3a1	0.494439	4932441J04Rik	2.41	Cenpf	0.331427
Gm9895	1.35734	Pole	5.3066	Ncapg	0.493467	9530006O14Rik	2.41	Cecr2	0.331382
Rad51ap1	1.35568	Pmf1	5.30029	Cenpu	0.492335	Ncapg	2.41	Cdc20	0.331292
Nusap1	1.35515	2810408A11Rik	5.28946	Hrob	0.491986	Crlf3	2.4	Slc6a19	0.33024
Wnt10b	1.35385	Dscc1	5.2717	Rpl31-ps8	0.49189	Ttc12	2.4	Glis1	0.327945
Aadat	1.34953	Neurl1b	5.26824	Nuggc	0.491437	Ptgdr	2.4	Espnl	0.327648
Chaf1a	1.34632	Cep128	5.26548	1700012J15Rik	0.490841	Ids	2.4	Tmsb15b2	0.327396
Irf4	1.34427	Kif15	5.25634	Gm45753	0.490544	Lrat	2.4	Phf16	0.327033
Cry1	1.34171	Wdr62	5.25106	Gm42655	0.48974	Dao	2.4	B4galnt3	0.325409
1190002F15Rik	1.33595	Pbx4	5.24696	Gzmk	0.489182	Brap	2.39	Aurkb	0.325267
Cenpk	1.33474	4930452B06Rik	5.23258	Olfr330	0.488965	5830490A04Rik	2.39	Cenpa	0.324981
Neil3	1.33367	Ncapg2	5.21626	P3h2	0.488711	Nudcd1	2.39	Kif11	0.323449
Creld2	1.3292	Cenph	5.20997	Frem2	0.487797	A430088I17Rik	2.39	C1qtnf9	0.323023
Ccnf	1.32791	Haus4	5.19603	Gm7816	0.487393	Krt14	2.39	Trib1	0.321034
Ly6d	1.31937	Zwilch	5.18456	Cybb	0.485248	Car13	2.39	Pdpr	0.320473
9430041J12Rik	1.31709	Cdkn2c	5.18016	Cdca2	0.483432	Wnt3	2.39	Corin	0.320134
B3gnt5	1.31602	Tcf19	5.17733	Gm15943	0.482963	Cryba4	2.38	Per3	0.319826
Ska3	1.31588	Tacc3	5.17631	Ccr2	0.482789	Dnajb5	2.38	Cbln4	0.319084
BC051070	1.31456	Brca1	5.15004	Lrp2bp	0.482694	Ednra	2.38	Lmx1b	0.317274
Stil	1.309	Plxdc1	5.14997	Armc2	0.482616	C80165	2.37	Dnahc11	0.31627
Crybb3	1.29941	Dbf4	5.13058	Gm44837	0.480897	Hbb-y	2.37	Rem2	0.316153
Cdca3	1.29365	Slfn9	5.12563	Abcg3	0.480747	Cct8	2.37	Anks6	0.31525
Cdt1	1.29294	Polq	5.08911	Gm37935	0.480461	Grid2	2.36	Ammecr1	0.315183
Chaf1b	1.28935	Ncapd2	5.08719	Dok2	0.47978	Sema3a	2.36	Wipf3	0.314551
Btla	1.28346	Uhrf1	5.07533	Clgn	0.479397	Gabrd	2.36	Papolb	0.313729
2810442I21Rik	1.28242	Cenpk	5.04397	Trim13	0.477255	AI315376	2.35	Cntnap5b	0.313523
Gucy2c	1.28159	Tnfrsf13c	5.03918	Anln	0.477212	Lrrc19	2.35	Prom2	0.313472
Spag5	1.28054	Arhgap11a	5.03147	Dlgap5	0.477134	Ivd	2.34	Zfp618	0.313344
Cenpm	1.27787	Fam111a	5.02153	Klhl35	0.476653	AI847159	2.34	Kif20b	0.313095
BC147527	1.27693	Kif20a	5.01068	4930598N05Rik	0.476541	C6	2.34	Ager	0.31307
Kif11	1.27365	Mad2l1	4.99944	C230024C17Rik	0.476257	Spaca4	2.34	Gm2518	0.312951
Diap3	1.27264	A930003A15Rik	4.99052	2310081O03Rik	0.474777	Dnah8	2.33	Dcaf12l1	0.311716
Gas2l3	1.27218	Cenpn	4.98559	Wdr72	0.474444	Crispld2	2.33	Sh2d7	0.311207
Serpina3g	1.27031	Nrgn	4.96564	2010109A12Rik	0.473655	LOC102638053	2.33	Npnt	0.310804
Siglec1	1.26942	Depdc1b	4.96447	Gm45805	0.469856	H60a	2.33	Sgol1	0.310652
Kif22	1.26536	Gli3	4.96186	Adamts4	0.469604	Lpar4	2.33	Slc27a2	0.310466
Depdc1a	1.26148	Fancb	4.94984	Gm26682	0.4695	Spink8	2.33	Nt5dc2	0.309089
Nsl1	1.26073	F2rl2	4.94961	Il1rl2	0.469332	Ldoc1	2.33	Sult1c2	0.309087
Kif20b	1.25555	Mastl	4.94221	Slc19a3	0.468253	9230106L01Rik	2.33	Otoa	0.30906
Prc1	1.25515	2610318N02Rik	4.93781	Gm14066	0.466688	C78452	2.33	Pax6os1	0.308858
Mis18bp1	1.25322	Mcm10	4.92017	Gm17399	0.466319	Slc1a1	2.32	Gpx2-ps1	0.308774
Arntl	1.25203	Rasa3	4.90342	Gc	0.465642	6330526H18Rik	2.32	Lrrc6	0.308611
2200002J24Rik	1.25008	Timeless	4.85338	Susd2	0.464862	Hhipl2	2.32	Rhou	0.308412
Sgol2	1.24864	Cdc25b	4.84333	Rdh16f2	0.463911	Serpinb5	2.32	Gm11762	0.307726
Ccna2	1.24617	Rrm2	4.83644	Mmp3	0.462117	Nlrp14	2.32	Cdh7	0.306883
Zfp831	1.241	Serpinb8	4.81993	Map4k1	0.461602	Gm17597	2.32	Foxm1	0.305583
Mcm2	1.2405	Plekhg4	4.81804	Tlr5	0.460156	Msh4	2.31	Mms22l	0.305478
Nrm	1.22659	Fanca	4.81163	Ifi209	0.459932	Muc15	2.31	Siglech	0.304391
Chtf18	1.22219	Cenpp	4.80751	Capn8	0.459589	Zc3h7a	2.31	D1Pas1	0.303634
Hp	1.2221	Phf19	4.77831	H2-DMb1	0.458476	Crisp3	2.31	Ckap2l	0.303579
Iyd	1.22174	Slit2	4.76892	Il33	0.457012	4930518P08Rik	2.3	Nhej1	0.303273
Cd2	1.21998	Usp43	4.76797	Ube4b	0.455789	Gm11681	2.3	Adamts1	0.303117
Morc1	1.21987	Cox6b2	4.76718	Mir670hg	0.453789	Krtap6-3	2.3	BC048546	0.302006
Cxcr2	1.21632	Galnt3	4.76431	Efcab5	0.453437	Epn3	2.3	Iqcg	0.301468
Marco	1.21512	Fbxo5	4.74755	Bub1b	0.45189	BC055324	2.29	Cacna1g	0.301385
Cdca2	1.20905	Gen1	4.73658	Xlr5a	0.446234	8430418B16Rik	2.29	Fev	0.301349
Slamf6	1.20463	C330027C09Rik	4.727	Gm48730	0.445318	LOC102639518	2.29	4930550C14Rik	0.301319
Ndc80	1.20141	Dtl	4.72549	Ccn3	0.445153	Zfp91	2.29	Wfdc16	0.300026
Dnase1l3	1.20074	Aurka	4.7192	Mmp12	0.444764	Hoxd1	2.29	P2ry12	0.299882
Oip5	1.19696	Arhgef26	4.71749	Pcp4	0.443665	Spag16	2.28	Foxo6	0.299823
Mms22l	1.19507	Tmem48	4.7125	Gm39526	0.442667	Ifi44l	2.28	Dct	0.299483
Dapl1	1.18596	Plk4	4.67127	Nlrp5-ps	0.441722	Tecrl	2.28	Pcdhga2	0.29942
Csn3	1.18476	Bora	4.63571	Gm9794	0.441162	Gm36529	2.28	Haus4	0.298731
Kif20a	1.18361	Brca2	4.62454	Sox30	0.441015	D17Ertd191e	2.28	Reg1	0.297652
Kifc1	1.17919	Rgs12	4.61994	Gm34225	0.440542	Ophn1	2.28	Six4	0.297208
Nfil3	1.17688	Blm	4.61269	Cfap46	0.440359	Gtpbp8	2.27	Aspm	0.296917
Fbxo43	1.17577	Hells	4.59372	Kif20b	0.439309	Sntg2	2.27	Enpp3	0.296903
Zwilch	1.17539	Scml2	4.59352	Slc25a5-ps	0.438686	Tnnt2	2.27	Cyp4b1	0.295447
Fbp2	1.17337	Myo1a	4.58973	Dapl1	0.437391	Ppp1r1c	2.27	Dpep1	0.294961
Sdf2l1	1.16581	Tsga10ip	4.56196	Gm12115	0.435998	A530030E21Rik	2.27	Asb4	0.294821
Dsn1	1.16472	Adcy2	4.54196	Kcnip2	0.435946	B630019K06Rik	2.27	Sstr2	0.29442
Cd22	1.16457	Slc5a4a	4.53476	Gm13524	0.435188	Pcdhb16	2.26	Gpr133	0.29268
Cdc45	1.16363	BC055324	4.51368	Gm49890	0.435025	Exoc3l2	2.26	Mslnl	0.292316
Bub1b	1.16274	Recql4	4.50054	Sp140	0.433401	2900046L07Rik	2.26	2010011I20Rik	0.291198
Spc24	1.16208	Hist1h2ag	4.47775	Chek1	0.431203	Dlgap5	2.26	Pgf	0.290976
Il2rb	1.1602	Zmynd10	4.45171	Agbl2	0.430917	Melk	2.26	Mpp4	0.290053
Fga	1.15869	Tnfaip8l1	4.44994	Col3a1	0.430173	Aspm	2.26	Glrx	0.289863
1500017E21Rik	1.15639	E2f7	4.44383	Gm50433	0.42983	Krtap21-1	2.26	Fbxo47	0.289301
BC035044	1.14713	Rdh12	4.44255	Vmn2r57	0.429189	Rasgrp1	2.26	Mkx	0.288714
Lama1	1.14685	Psmc3ip	4.4366	Tlr13	0.429031	Ptk6	2.26	Arl4d	0.28856
E2f7	1.14071	4930528F23Rik	4.42719	Cdh11	0.428745	Milr1	2.25	Cspg5	0.288356
4930470P17Rik	1.14044	Atad2	4.41023	Fn1	0.427784	6030442K20Rik	2.25	Txnip	0.288161
Fam111a	1.13643	Ddx11	4.40698	Gm14276	0.427264	Tpt1	2.25	Slc24a5	0.288146
Serpina3i	1.13602	Rfc4	4.40205	Slc35f4	0.427122	2900057B20Rik	2.25	Dmbt1	0.287233
Foxm1	1.13483	Kitl	4.39921	Cenpa	0.426846	Adam18	2.24	Dazl	0.287223
Gimap3	1.13429	Raet1d	4.39139	Pla2g4a	0.42464	Zfp82	2.24	D2Ertd750e	0.286327
Chek2	1.13269	Gm5465	4.38686	Scara5	0.424614	1700120E14Rik	2.24	Adamts17	0.286143
Clhc1	1.12038	Clec2l	4.38255	Tmem132d	0.424428	Plac8l1	2.24	Xkr7	0.286
Pole2	1.12022	Eme1	4.37087	9330136K24Rik	0.424419	1700006J14Rik	2.23	Egr1	0.285651
Kif23	1.12007	Atad5	4.35432	Frmpd1	0.424206	Tnni3k	2.23	Pxmp4	0.285458
Card11	1.11829	Fbxo40	4.3519	Esr1	0.422125	AI606473	2.23	Etfb	0.285406
Acpp	1.11431	Smc4	4.33695	Rgs9bp	0.422077	4932438A13Rik	2.23	Aim1	0.284831
Atad2	1.11415	Cdc6	4.32535	Ano3	0.417412	2610037D02Rik	2.23	Fam189a2	0.284482
Cdk15	1.10739	Ankrd61	4.31921	Eldr	0.416798	Cep44	2.23	Tmem200a	0.283931
Lonrf3	1.10582	Trim59	4.31795	Hells	0.415374	Ccdc110	2.23	Hspa1a	0.283186
Ptprcap	1.1034	Hist1h2ak	4.31147	BC051142	0.415252	B3gntl1	2.22	Polr2k	0.281867
Anln	1.10138	Ezh2	4.28497	Ptprc	0.415125	4933406C10Rik	2.22	9130019O22Rik	0.281779
Gm5640	1.10011	Cort	4.25238	Cenpn	0.413828	Perm1	2.21	Lrch2	0.280754
Hist1h1e	1.09909	Pear1	4.25159	Gm49871	0.413583	9430013L17Rik	2.21	Hcn4	0.28014
D730005E14Rik	1.09711	E130203B14Rik	4.23987	Havcr2	0.41347	Actr1b	2.21	Ube2s	0.280095
Aurka	1.09137	Mcm3	4.231	Sema3a	0.413167	Car5b	2.21	Hspa1b	0.2798
AI593442	1.08803	Tubb5	4.23087	Gm26912	0.41244	Serpina3a	2.21	Tnfaip8l3	0.279694
2700099C18Rik	1.0792	Tnni3	4.22371	Dazl	0.411697	B230118H07Rik	2.21	Cldn4	0.27944
Mlf1ip	1.07873	Ano3	4.21133	8430426J06Rik	0.411093	Zic3	2.21	Acsbg1	0.279411
Lig1	1.0775	Skp2	4.19964	Muc4	0.409979	Ankrd55	2.2	Haghl	0.279205
Espl1	1.0733	Mboat1	4.19792	Mlf1	0.409166	4933413G19Rik	2.2	Hdac9	0.2777
Chek1	1.07255	4930427A07Rik	4.17439	Ube2t	0.408802	Tmem40	2.19	Gucy2e	0.277415
Tmem252	1.07033	3010026O09Rik	4.17373	Gm50353	0.407633	Platr22	2.19	Anpep	0.277303
Fcrl1	1.06948	Cdt1	4.16467	Slfn9	0.406334	Rad51b	2.19	Irs2	0.276461
Gsdma	1.06924	BC048355	4.16344	Ifi44	0.406084	Lrriq4	2.19	Acat1	0.275417
2410137F16Rik	1.06836	Haus8	4.14736	Dcx	0.40603	Sox1	2.19	Ankrd6	0.275217
Tnfsf8	1.06628	Etv4	4.1356	Gm17494	0.405792	B230307C23Rik	2.18	Lhx6	0.274969
Ugt1a9	1.05178	Poc1a	4.13167	Cenph	0.405394	B930053N05Rik	2.18	Lgi2	0.274459
Polq	1.04984	Tyms	4.12828	Pole	0.405002	Gpr26	2.18	Sik1	0.274407
Cdca7	1.04444	Dna2	4.12206	Adgrg3	0.404948	Cdc40	2.18	Scml2	0.274188
Ccl5	1.03998	AI646023	4.11511	4933402D24Rik	0.40317	Gm17750	2.18	Cenpw	0.273593
Mcm6	1.03139	Itgae	4.11301	Spsb4	0.402176	1200003I10Rik	2.17	Tusc5	0.273433
BC024139	1.02961	Mis18a	4.10627	Gm38080	0.402055	Glra3	2.17	Dzip1l	0.273081
Cdkn1a	1.02703	Mcm5	4.10055	Ggn	0.401975	Gm266	2.17	Gm5126	0.272475
Spdl1	1.02475	Ecm2	4.09816	Arhgap36	0.401609	Tmem255a	2.16	Mctp2	0.272347
Smc2	1.01897	Kctd19	4.09668	Gm10138	0.40102	Fam105a	2.16	Tnfrsf10b	0.27212
Sntg2	1.01897	Lmnb1	4.09293	Serpina7	0.400506	Hoxd3os1	2.16	Gm609	0.270604
Trip13	1.0158	Lig1	4.083	Prr11	0.40033	Dmrt3	2.16	6030405A18Rik	0.27023
Cenpw	1.01561	A630055G03Rik	4.07988	Barhl1	0.399802	D14Ertd611e	2.16	Cysltr2	0.270094
Rrm2	1.01321	Chaf1b	4.07654	Gm17733	0.398949	Defa29	2.16	Apold1	0.269783
P2ry10	1.01309	Cdc45	4.07398	Kif27	0.398806	Hs3st4	2.16	A530072M11Rik	0.268461
Kif15	1.00609	Stk17b	4.07254	Fhod1	0.397366	D7Ertd187e	2.15	Radil	0.268128
Arhgap11a	1.00594	Atp10a	4.06969	A530072M11Rik	0.395137	Fgf10	2.15	Prss2	0.268073
Serpina3n	1.00481	Gm6531	4.06252	Edil3	0.395	4931439C15Rik	2.15	Enox1	0.267832
Cep55	1.00286	4932442L08Rik	4.05858	Nsl1	0.394969	4930533B18Rik	2.15	Lrp2bp	0.267782
Rtn4r	0.997048	Reep4	4.02279	1700066B19Rik	0.394674	Klra16	2.15	Slc2a9	0.267627
H2-Oa	0.988595	Aaas	4.01681	Gm14221	0.393577	Cd200r1	2.15	Cabp7	0.267581
Ccl28	0.986389	Kntc1	4.01513	Gm38137	0.393468	Csn1s2b	2.15	Wnt5b	0.267428
Mmp3	0.984238	Map4k1	3.99827	Gm8189	0.393237	Il21	2.14	Dscam	0.267286
Vgf	0.981138	Elfn2	3.99683	Zp2	0.391937	4930565N06Rik	2.14	Pygl	0.266102
Prr11	0.980234	H2afx	3.99524	C3	0.391906	Gm996	2.14	Lrp5	0.265897
Bcl11b	0.979823	Orc1	3.99362	Fancd2	0.391357	4921539E11Rik	2.14	Krt80	0.265856
1700001L19Rik	0.979002	Fam83d	3.97759	Tmem181b-ps	0.391211	4930444K16Rik	2.14	Ccdc24	0.265243
Nucb2	0.97854	Mtap7d3	3.97591	Nuf2	0.390423	Magel2	2.14	Fam167b	0.264636
Depdc1b	0.977169	1700061G19Rik	3.96828	Abcc9	0.390396	Inadl	2.14	Mapk4	0.263723
Cacng3	0.975482	Cyp39a1	3.95754	Milr1	0.390309	Antxr1	2.13	Hacl1	0.263708
Slc17a9	0.974652	Sass6	3.93958	Cd84	0.390073	2900046F13Rik	2.13	A430107O13Rik	0.263305
3632454L22Rik	0.971394	Gins1	3.92967	Cfap58	0.388963	Naaladl2	2.13	Phldb3	0.26301
Oas3	0.968307	Hjurp	3.92824	Mfap3l	0.388585	AW011738	2.13	Tbx1	0.262984
Oas2	0.964225	Kif24	3.92471	Panct2	0.387803	4930518J20Rik	2.13	Cx3cl1	0.262186
Acap1	0.961863	Cdk2	3.91544	Teddm2	0.387543	Arhgap9	2.13	2410018M08Rik	0.261105
Fancd2	0.960972	4930422G04Rik	3.89652	Crb1	0.387168	Chil3	2.13	Slc2a13	0.261105
Psat1	0.960464	Fancg	3.8903	Gm3510	0.387067	Wt1os	2.13	E2f7	0.260862
1700066B19Rik	0.958801	Gpsm2	3.88989	Scn9a	0.386987	Sccpdh	2.13	Anks4b	0.2606
Tyms	0.958557	Tk1	3.88648	Samsn1	0.386701	Ehhadh	2.12	Esrrg	0.259953
Ncapd2	0.956696	Katnal2	3.87611	Nos1ap	0.386288	Khdc1a	2.12	Tlr12	0.259893
Gm19461	0.955832	4632434I11Rik	3.87376	9330159M07Rik	0.386056	Mrpl15	2.12	2700023E23Rik	0.259615
Fgg	0.953877	Homer2	3.87333	Gm29666	0.385712	Hmgb4	2.12	Inmt	0.25951
Ltb	0.953527	Pask	3.86966	Gm35558	0.385676	Mkrn3	2.12	Hivep3	0.259389
Cyp4f41-ps	0.952941	Fxyd4	3.86109	Tpbgl	0.38433	Frmd3	2.12	Abcb4	0.259188
2610203C22Rik	0.952552	Ccdc34	3.8593	Sh2d1b1	0.383983	2410004I01Rik	2.11	3110001I22Rik	0.259054
Cd4	0.948597	Grm2	3.85725	Noxo1	0.383533	Ccr1	2.11	Rpl37a	0.258514
Cenpn	0.948198	Mnd1	3.85584	Calcr	0.383216	4930509E22Rik	2.11	Tef	0.2583
Mtfr2	0.945053	Mutyh	3.8475	Tnfrsf23	0.382494	C79562	2.11	2610019E17Rik	0.25816
Bard1	0.94474	Inf2	3.8416	Spaca1	0.38227	Uhrf1	2.1	Cyyr1	0.25809
Tacc2	0.942491	Cit	3.83965	H2bc9	0.381696	Stx1b	2.1	Nek5	0.258013
Hist1h3d	0.940973	Piwil4	3.82484	Slc28a2b	0.379772	Nuf2	2.1	Il6ra	0.257202
C530044C16Rik	0.93764	Coro6	3.82475	Gm37296	0.379651	Gm29811	2.1	Galnt13	0.256639
Dhfr	0.931215	Ccdc67	3.80731	Rgs1	0.379407	4933401B06Rik	2.1	Cep70	0.256495
Phf19	0.929449	Cr2	3.80507	Gm4681	0.379167	C86371	2.1	Taf4b	0.256295
Palb2	0.927174	Pttg1	3.80381	4930412L05Rik	0.378766	Klrc2	2.1	N4bp2l1	0.256184
Fam46b	0.925507	Hn1	3.79467	Gm50341	0.378622	Cdc6	2.09	Rps8	0.256048
Zbtb16	0.922865	Plekhf1	3.78468	Gm18890	0.377657	C130050O18Rik	2.09	Cebpb	0.255236
Brip1	0.922002	2210011C24Rik	3.78297	Medag	0.377566	Itgb2l	2.09	Dera	0.255061
Cks1b	0.919401	Dll3	3.77191	Zfp967	0.377408	Scgb1a1	2.09	Fam83b	0.255036
E2f1	0.918571	Mms22l	3.76851	1810012K16Rik	0.377142	4930500F04Rik	2.09	Kcnip3	0.254217
Chst3	0.915907	Angpt4	3.76813	Cdca3	0.376663	Pla2g4c	2.09	2410021H03Rik	0.254126
Cd37	0.914989	Fam38b	3.76502	Gm13522	0.376525	Gm33298	2.09	Sytl2	0.254065
Mnda	0.914872	Bves	3.76309	Lama3	0.376514	9330118I20Rik	2.09	Psenen	0.254039
Gc	0.912064	Nrk	3.75963	B3galt1	0.376345	9530034A14Rik	2.08	Glis3	0.253272
Haao	0.909967	Cenpt	3.75219	BC049715	0.375707	Fmo4	2.08	Arhgap8	0.253216
Gm4262	0.903353	Arhgap33	3.74563	Gm10030	0.375321	Tespa1	2.08	Stk32b	0.252514
Veph1	0.902004	Afap1l1	3.73731	Fgg	0.375039	Lrp2	2.08	Ppfia2	0.252221
Stmn1	0.901186	Drd2	3.72948	Tlr6	0.372549	Lpar2	2.08	Fbp1	0.252162
Fen1	0.898554	4933430H15Rik	3.72409	5830444B04Rik	0.371534	Fv1	2.07	Ccdc164	0.251651
Traf1	0.898429	Cacna2d3	3.71808	Il18r1	0.371506	Angpt2	2.07	4930523C07Rik	0.251433
Dctd	0.898141	Rrm1	3.71001	Hcn1	0.371446	A730056A06Rik	2.06	Efhc1	0.251342
Gm16853	0.894457	Pold1	3.70859	Cip2a	0.371266	Ngf	2.06	Glb1l2	0.251061
Hist1h2bn	0.89416	Rad18	3.70412	Lin7a	0.369877	Hba-a1	2.06	Abcd2	0.250446
Igj	0.893944	6030408B16Rik	3.69978	Smc2os	0.366863	Sgca	2.05	Rwdd3	0.249842
4931429I11Rik	0.893938	Mtap1a	3.69704	Nek10	0.366027	4921539H07Rik	2.05	Tsga10	0.249545
Rnaseh2c	0.893514	Mtbp	3.69364	Ubd	0.365445	Ifng	2.05	2210404O07Rik	0.249232
Lrrc39	0.892701	Mcm8	3.68994	Gm45925	0.364154	Vmn1r45	2.05	Scn3a	0.249191
Gmds	0.889158	Tube1	3.68716	Ncf2	0.363714	D6Ertd490e	2.04	Alox8	0.248645
Iqgap3	0.889096	Tnnt2	3.68618	9430037G07Rik	0.362707	2310007B03Rik	2.04	Trpc3	0.248236
Wdr62	0.886418	Thap8	3.68211	Diaph3	0.362636	Gm38604	2.04	2310040G24Rik	0.247762
Kcp	0.877354	Kcnmb3	3.68147	Pirb	0.362376	2810428J06Rik	2.04	Ptgir	0.247287
Parpbp	0.876751	Acsm3	3.67812	9230114K14Rik	0.361508	Zmat4	2.04	Pole	0.247031
Serpinb8	0.876349	Gins2	3.66927	Gm28982	0.361274	Nr2c2ap	2.04	4930579G22Rik	0.246962
Reg2	0.873949	Tnfsf13b	3.66019	Gm4577	0.360783	Clcf1	2.04	H2afz	0.245935
Yif1b	0.870383	Racgap1	3.65463	Gm32063	0.360262	Bcas2	2.04	Erf	0.245556
Cxcl9	0.87003	Ccne1	3.64817	Hey2	0.359448	Kcnk4	2.04	Kcnj2	0.245387
Efcab11	0.868826	Tuba3a	3.64599	Gucy1a2	0.359004	4933409F18Rik	2.04	D430020J02Rik	0.245327
Ncapg2	0.864656	Aif1l	3.6432	Stil	0.358964	Stoml3	2.04	Bik	0.245316
Dnahc6	0.863621	Rad54l	3.63872	Spag5	0.358859	4833420D23Rik	2.03	Akap6	0.245193
Gm5148	0.863075	Pkmyt1	3.61779	C4bp	0.358265	Atp8b2	2.03	Fam189a1	0.245095
Slc1a3	0.862286	Pola1	3.6118	Pde6a	0.357728	9430064I24Rik	2.03	Fam98c	0.244732
Ska1	0.861451	Fam33a	3.60814	Abi3bp	0.357688	3110037C07Rik	2.03	Hmmr	0.244418
Kifc5b	0.859026	Haus3	3.58775	1700054A03Rik	0.357364	Tas2r108	2.03	Tmem151b	0.243654
Cck	0.858805	Eri2	3.57901	Apcdd1	0.357183	Psg18	2.03	Ifih1	0.243525
Scube3	0.856135	Lrrc66	3.57562	E230016M11Rik	0.357056	Eif2ak1	2.03	Gpc4	0.243496
Mcm7	0.855781	2310001K24Rik	3.56765	Gm13483	0.35681	Krtap16-3	2.03	Nr3c2	0.243475
Hmgb2	0.854885	Tagln3	3.56602	Gm20628	0.35672	D13Ertd94e	2.03	Pion	0.243027
Timeless	0.854224	Rnf144b	3.54564	Gm48913	0.356186	BC006965	2.02	Fam46d	0.24281
2610318N02Rik	0.853229	B230325K18Rik	3.54154	Tph2	0.355842	Phospho2	2.02	Mylip	0.242592
Racgap1	0.852661	Rcc1	3.52584	Tbxas1	0.355772	Hapln2	2.02	Tmsb15b1	0.242453
Ccdc18	0.850774	Cdca7l	3.52092	Serpinb8	0.355076	Orm2	2.02	Serpina7	0.241682
C330027C09Rik	0.84886	Cntd1	3.51841	5330434G04Rik	0.354853	Gm36707	2.02	Chmp4c	0.241544
Nlrc3	0.843431	Crabp2	3.51747	Patl2	0.354497	D9Ertd256e	2.02	Arg1	0.241516
AI662270	0.842734	Enkd1	3.5168	Ush2a	0.353418	4930453J04Rik	2.02	Fam171b	0.241119
Rxfp2	0.838998	Zfp367	3.50729	Fam83c	0.352996	Ceacam11	2.02	D14Ertd668e	0.240956
Pdia6	0.837541	Faim3	3.50654	Col12a1	0.35242	Ccdc82	2.02	Spsb2	0.240682
Kctd16	0.834444	Stom	3.5041	Gm19705	0.352114	Hcls1	2.01	C3	0.240178
Cish	0.833621	Iqca	3.50152	Ppfia4	0.35133	Nek8	2.01	Kctd12b	0.239289
Mt3	0.832854	6030429G01Rik	3.49077	Zwilch	0.35116	Hypm	2.01	Slc38a4	0.238953
Topbp1	0.832022	H1fx	3.48413	2610318N02Rik	0.350149	Skint10	2.01	Ncapg	0.238913
Ube2t	0.831343	Stk31	3.48136	P2ry10b	0.350138	Agtr2	2.01	Jak3	0.238827
Cnr2	0.831182	Gabrd	3.47556	Cenpk	0.34961	BC048679	2	Msln	0.238769
Lyz1	0.829036	Miip	3.47381	Gm49694	0.349435	Slc39a4	2	Rarb	0.238622
Cep128	0.826899	Taar2	3.45991	5930403N24Rik	0.349428	4930584F24Rik	2	Fut10	0.237976
Ppp1r17	0.825696	Heatr7b1	3.45813	Parvg	0.348612	4931431F19Rik	2	Gins2	0.237182
Mastl	0.825687	Cep152	3.45582	Bcl2l14	0.347248	Ccdc69	2	Pcp4	0.237137
Onecut1	0.821035	Slc1a1	3.44956	Myom1	0.347166	Gm32960	2	Dach1	0.236741
Mboat1	0.820904	Cenpq	3.44733	Gm49785	0.347069	4930556J24Rik	1.99	Sv2b	0.236636
Rac2	0.820904	Serpinb1b	3.44705	Zcwpw2	0.346756	4922502B01Rik	1.99	Ccdc19	0.236143
AI506816	0.82018	Dnali1	3.4427	Naip5	0.346531	Bmp15	1.99	Acadvl	0.235817
H2-Ob	0.819226	Pxmp2	3.43811	Abcc2	0.346276	Sik3	1.98	Sorcs2	0.235717
Sp140	0.816362	4831426I19Rik	3.43317	Tbx15	0.345672	4930456G14Rik	1.98	Dlgap5	0.235689
Kcnj4	0.814634	Cdc7	3.4326	3632454L22Rik	0.34561	A230009B12Rik	1.98	Fgf9	0.235336
Lmo1	0.814127	Nkd1	3.42943	Cd53	0.345014	Rpusd2	1.98	Dnajc22	0.235081
Gm16551	0.811975	Layn	3.42933	Tigd3	0.344902	Hsf2bp	1.98	Rpusd1	0.234543
Map4k1	0.81031	Ptpre	3.41156	4931440P22Rik	0.344859	Chst5	1.97	Tfpi	0.234529
Cenpp	0.806256	Cks1b	3.41129	Lum	0.344843	Rgr	1.97	Mum1l1	0.234405
Rfc4	0.804966	Drp2	3.39944	Gm12263	0.34455	D8Ertd67e	1.97	Fam101a	0.234367
Reg3g	0.804332	Best1	3.39524	Gm31323	0.34439	4930448D08Rik	1.97	Cplx2	0.234092
Bambi-ps1	0.800807	Itgb1bp2	3.39213	Tmem252	0.344251	9530078B04Rik	1.96	Rab37	0.233605
Sfn	0.799263	Aff3	3.39146	Slc1a2	0.343851	Runx1	1.96	1190002F15Rik	0.233569
Mcm8	0.795287	Tbxa2r	3.38319	Gm44066	0.343775	Slc26a8	1.96	Gm6548	0.233447
Ddx11	0.792862	Galntl1	3.37354	Dock2	0.343315	Sprr2f	1.96	Setmar	0.23277
Acer2	0.792832	Abca6	3.37257	Snca	0.342694	Gzme	1.96	Nfkbia	0.232632
Fancb	0.79272	Slc25a10	3.37163	Gm34237	0.342507	Toporsl	1.96	Slc8a2	0.232564
Mcm4	0.792592	Ppp1r1b	3.36631	Plet1os	0.342124	Upk3bl	1.95	Fhit	0.231818
Prom1	0.789386	Cdk5rap2	3.3661	Mmp13	0.341687	2610011I18Rik	1.95	Tube1	0.231193
Sucnr1	0.783091	Gmnn	3.36558	Gm42814	0.341181	Il1rapl2	1.95	Cenpp	0.23116
Mad2l1	0.782768	Efhd1	3.36331	Cdk1	0.340638	4930524B17Rik	1.95	Spag5	0.231156
Piga	0.782626	Zglp1	3.36272	Fyb	0.340483	9430012M22Rik	1.95	Robo1	0.231095
Timd4	0.7808	Gnb3	3.35944	Anxa10	0.34003	Olfr74	1.95	Kcnb2	0.231014
Cfb	0.780729	Fcgbp	3.35743	Gm41031	0.339493	Fbxo15	1.94	Top2a	0.230294
Cacng2	0.780714	Ier5l	3.34909	2610206C17Rik	0.339221	Adcy5	1.94	Atm	0.22996
Pyhin1	0.780312	Gpr64	3.34901	Cped1	0.339038	AA511254	1.94	Nr1h4	0.22993
Nptx2	0.780274	Mybpc1	3.34833	Gm34809	0.338911	Neurod4	1.94	Vtn	0.22972
Cgref1	0.780021	Nde1	3.34728	4933417E11Rik	0.338843	Kcnn4	1.94	Uba52	0.229577
Rasgrp1	0.779299	Gja5	3.34593	5430430B14Rik	0.33874	Oprm1	1.94	Rnf144a	0.229225
AI427809	0.77882	Mmp11	3.34425	5033421B08Rik	0.33837	4933407C09Rik	1.94	Fmod	0.229132
Rrm1	0.7774	Tbc1d31	3.34062	A430108G06Rik	0.338218	Defa3	1.94	Man1c1	0.229064
Krt83	0.777319	Tonsl	3.3368	Fos	0.337678	Kctd4	1.94	H1fx	0.229037
Gm4951	0.77719	Syt15	3.33463	Olfr920	0.337581	9530059O14Rik	1.93	Mastl	0.228525
Ccnjl	0.77638	2700094K13Rik	3.33322	D630036H23Rik	0.337498	Vps54	1.93	Sh3d19	0.227956
4930427A07Rik	0.772921	Xrcc2	3.32786	D430041D05Rik	0.336914	AI451458	1.93	Acad12	0.227844
Nup62cl	0.772791	Mybl2	3.32032	Igsf10	0.336867	1700001P01Rik	1.93	Ccdc109b	0.227359
Myocd	0.77026	Shmt1	3.31412	Gm47863	0.336835	Krt12	1.93	Dtwd2	0.227358
Tgm1	0.768786	9430015G10Rik	3.30806	Ndc80	0.33664	4933440J02Rik	1.93	Pim2	0.227307
Snora7a	0.767506	Mcm7	3.30778	Gm42133	0.336586	Gpr149	1.93	AI607873	0.227141
Cxcr3	0.76703	Fign	3.30751	Fmo4	0.335485	Fcgr1	1.93	Cldn11	0.226747
Recql4	0.761285	Pole2	3.30586	Ly86	0.335128	Slc2a3	1.92	Pemt	0.226251
Hist1h3e	0.760263	Jph1	3.29377	Plxnc1	0.335071	Phf14	1.92	Zp2	0.225991
Htr1b	0.76026	Lrdd	3.29039	Gm49383	0.335056	Fign	1.92	Calb1	0.225889
Zc3h12d	0.755557	AY074887	3.28834	Plxdc2	0.334928	Clec2e	1.92	Cadps2	0.225846
Slc45a3	0.754205	1700010B08Rik	3.2758	Gm37607	0.334865	Scmh1	1.92	Klf5	0.225695
Tonsl	0.753994	Zfp41	3.26809	4930555F03Rik	0.334684	Exo1	1.92	Klb	0.224971
Ghsr	0.752771	5830418K08Rik	3.26806	Crybb1	0.334453	4933423K11Rik	1.92	March4	0.224585
Lax1	0.752274	Orm3	3.26467	H1f4	0.334414	C77949	1.92	Arhgdig	0.22447
Rad51b	0.751496	Gabrb1	3.26216	4932438H23Rik	0.333713	Lhfpl3	1.92	6430573F11Rik	0.22409
Slc2a6	0.742877	Rbl1	3.259	Gm18649	0.333001	Fbxw24	1.91	Gm11696	0.224068
Prim2	0.742033	Cd80	3.25544	Kif15	0.332721	Ly9	1.91	Tert	0.224043
Mybl2	0.741639	Zcwpw1	3.24644	Gm2762	0.331903	Ylpm1	1.91	Anln	0.223973
Mep1a	0.741264	Rnaseh2c	3.24517	Ccl9	0.331712	Cd80	1.91	Plekhh2	0.223968
Gabra4	0.741228	Vangl1	3.24211	4930503L19Rik	0.331665	Mgat4c	1.91	Clspn	0.223675
Ankrd34b	0.739912	Tuba1b	3.23609	Gm12185	0.330922	Cxcl15	1.91	Btbd11	0.22338
Ism1	0.738018	Ttll9	3.23181	Plppr4	0.33052	Etos1	1.91	Cib2	0.223374
Kcnk10	0.735701	Dhfr	3.22436	Tlr1	0.330406	A430010J10Rik	1.91	Dhx58	0.223363
Vipr2	0.734817	Pnldc1	3.21949	Gm5586	0.330134	Kif23	1.91	Rps6ka5	0.223292
Sash3	0.733542	Hmgb2	3.20755	Csf2rb	0.329676	Trhde	1.91	Ppp1r3b	0.223268
Sgol1	0.73143	Rttn	3.19778	Rps3a2	0.329203	4930509H03Rik	1.91	Sh3bp4	0.223193
Mybl1	0.730233	Prim1	3.19654	Padi2	0.328475	Slc15a5	1.91	Cacna2d4	0.223076
Gpr132	0.727959	Epn3	3.19488	Mastl	0.32797	E330013P04Rik	1.9	Pbld2	0.222842
Pola1	0.727552	Myh7b	3.1919	M5C1000I18Rik	0.327776	Klhl11	1.9	Zkscan16	0.221712
Gm12830	0.726871	Sema3g	3.18844	Nupr1l	0.327694	Celrr	1.9	4930579G24Rik	0.22122
Sla	0.719532	Duox1	3.1834	Radx	0.327642	Il12rb2	1.9	Fgfr1op	0.221105
Nt5e	0.718856	Nsg1	3.18216	Clec14a	0.326929	Slc19a3	1.89	Rgnef	0.220497
Zbp1	0.715527	Suv39h1	3.1789	Gm10297	0.326368	Tpsab1	1.89	Tmem117	0.220408
Psmc3ip	0.714532	Foxc1	3.17768	Cpa4	0.325425	A230102O21Rik	1.89	Gad1	0.220311
Thrsp	0.711442	Tex14	3.17209	Gm17115	0.324982	1700084F23Rik	1.89	Pdzrn3	0.219718
Ada	0.710913	Slc15a1	3.17102	Gm9333	0.324588	Kifc1	1.89	Slc29a4	0.219451
Cd69	0.7096	Cybrd1	3.16439	Zfp69	0.324329	Syt1	1.89	Crispld1	0.219174
Pola2	0.709245	Nrarp	3.16177	Rad54l	0.324045	Lypd1	1.89	Arhgap36	0.218946
Tfpi2	0.707676	Mstn	3.15707	Kcnk10	0.323289	9430031J08Rik	1.89	Clic5	0.21892
Rnf125	0.707463	Sh3bp1	3.1563	Brinp1	0.323028	Them7	1.89	Aebp1	0.218526
Odc1	0.707037	Ccdc14	3.15508	Gm20655	0.322948	Slc19a2	1.88	Ccdc40	0.218506
Pdk4	0.705841	Pdlim1	3.15239	Clec4a3	0.322826	Klrc1	1.88	Bmf	0.218362
Hist1h2ad	0.700291	Pola2	3.1513	Traip	0.322695	Tecpr1	1.88	Sox5	0.21807
BC055324	0.691189	Tmeff2	3.15093	Cldn11	0.322622	Zbtb46	1.88	Eda	0.218028
Gpr137c	0.689119	Rgs3	3.15006	Vcam1	0.322298	Bcl7a	1.88	Cep72	0.218017
4930405A21Rik	0.68796	Zmat4	3.14982	Itga4	0.322224	Gins2	1.87	Hs6st3	0.21785
Cdsn	0.68635	Tmem30c	3.14763	Gm31373	0.322103	Ttf2	1.87	Zfp46	0.21781
Gabrp	0.685487	Iigp1	3.14018	Samd4	0.321591	Adtrp	1.87	Ralgapa2	0.217314
Gm2447	0.685483	Cchcr1	3.13874	Nkd2	0.321454	Col24a1	1.87	Lgals3bp	0.217026
Ccrn4l	0.684627	Pfkfb1	3.13391	Pcdh19	0.321303	Kif2a	1.86	Gab3	0.216811
Gp9	0.684617	Acta2	3.11818	Steap4	0.321112	E030042N06Rik	1.86	Pla2g2c	0.216528
Kif24	0.684321	Kcnj9	3.11362	Gm41177	0.321086	Cdh23	1.86	Rgma	0.216236
Uqcrq	0.6841	Serpina1a	3.10609	Vav3	0.321016	Rad54l	1.86	Deptor	0.216004
Il1r1	0.683873	Hist1h1a	3.09599	Rwdd2a	0.320913	Rp1l1	1.86	Ptprr	0.215978
Cebpd	0.683388	Slc16a4	3.09517	BB557941	0.320605	Ccdc83	1.86	Ankrd44	0.215954
Gm5105	0.683111	Asxl3	3.09287	Ms4a6b	0.320003	Wnt8b	1.86	Plcxd3	0.215952
Myh7b	0.68133	Wisp3	3.09128	Gen1	0.319993	Rad23a	1.86	Gipc2	0.215926
Cytip	0.678404	Abcg4	3.08927	Cdh6	0.31972	Gm20066	1.86	Tmem28	0.215865
Prr15l	0.676216	Cxcl17	3.08008	Myo9a	0.319709	LOC102642487	1.85	Igsf9	0.215762
Egfr	0.674579	Prim2	3.06887	Gm17954	0.319619	S100a8	1.85	Bmpr1b	0.215513
D930015M05Rik	0.673971	Apitd1	3.06808	Ell2	0.319415	C030011I16Rik	1.85	Slc39a8	0.215377
Dbf4	0.673715	4933413G19Rik	3.06619	Gm20541	0.318673	C76628	1.85	Trim34a	0.215292
Npr3	0.673309	1700023E05Rik	3.06314	Tlr7	0.318618	C030007D22Rik	1.85	Bub1b	0.215169
A930011G23Rik	0.673026	Arl6ip1	3.05443	Gm15657	0.318556	Dynap	1.85	Bambi	0.215079
Plcd3	0.670825	Haus1	3.04906	Ugt1a7c	0.318423	Csta1	1.85	Dusp4	0.215061
BC055111	0.668776	Fbln2	3.04664	D330041H03Rik	0.318075	Bcas1	1.85	Dnajb1	0.214908
4930579G24Rik	0.667552	Gm5577	3.04488	Nexmif	0.318025	Ifna11	1.85	Ms4a4d	0.214449
Ezh2	0.6658	Larp6	3.04385	Ddx60	0.317471	Dmtn	1.84	Cux2	0.21433
Pmf1	0.66537	Prx	3.02793	Sgcz	0.31728	Rasd2	1.84	Dok7	0.213876
Adra1a	0.664944	Tmem100	3.02727	4430402I18Rik	0.317247	Gm15122	1.84	Zc3h12c	0.213852
Ms4a4c	0.66488	Fbxo43	3.02672	Gm13033	0.316414	4930471G03Rik	1.84	5430405H02Rik	0.213814
Ptpn22	0.663992	Klhl5	3.02604	Gm5454	0.316137	Pou4f1	1.84	Ky	0.213519
Adm2	0.663653	Cenpo	3.02581	Zfp804b	0.315522	Cdk5rap2	1.84	Man1a	0.213456
Syce1	0.663456	Zfp382	3.02121	Zcchc12	0.315383	Cdk1	1.83	Sumf2	0.213411
Ssr4	0.662123	Xcr1	3.01515	Snhg14	0.315206	Tiam2	1.83	Kntc1	0.213325
Gen1	0.660996	Abca17	3.01499	Pla2g7	0.314266	Mctp1	1.83	Lrrc3b	0.21303
AF529169	0.660483	Tmem194	3.00743	Gmpr2	0.313938	Gm32743	1.83	5830418K08Rik	0.212946
Spp1	0.659117	Ccdc155	3.00704	Spc25	0.313893	0610039K10Rik	1.83	Gpihbp1	0.212831
Steap4	0.659082	Tnfsf15	3.00519	Psma5-ps	0.313713	Nfam1	1.83	Jam2	0.212528
Pold1	0.658208	Ttf2	3.00366	Rgs10	0.313159	Zfand3	1.83	Fosl2	0.212318
Insl6	0.654289	Dnase1l1	3.00203	Galr2	0.313127	Styx	1.83	Rslcan18	0.212281
Capn11	0.653067	Fsip1	2.99862	Ccdc152	0.313045	Fam19a4	1.83	Hdac6	0.211676
9030617O03Rik	0.650668	Dek	2.99784	AI839979	0.312158	Gm11487	1.83	Wdr31	0.211666
Mbnl3	0.647419	Olfr543	2.99746	Rad51ap2	0.312015	Fam188a	1.83	Pcdhgb2	0.211466
Cntn4	0.646064	Bok	2.99565	Gm42031	0.311565	Zic2	1.83	Rplp2	0.211192
Apitd1	0.645258	Grid1	2.99272	Gm17705	0.311409	4933421H12Rik	1.83	Casp7	0.211125
Lmf1	0.644278	Dctd	2.99228	Col27a1	0.311058	Txnrd2	1.82	Odz3	0.211121
2210408F21Rik	0.644022	Lsm2	2.99208	Enpp3	0.310973	Car8	1.82	Hdac5	0.210694
Mir682	0.641093	Arhgap20	2.99105	Gm16984	0.310579	Cxcl11	1.82	Spnb1	0.21059
Inhba	0.640168	B3gnt5	2.98686	Gm39929	0.309993	Iqcf5	1.82	Fgd1	0.210571
Gpx1	0.6396	Cnih2	2.98629	Shisa7	0.309742	Gas6	1.82	Gm6524	0.210566
Mgme1	0.637947	Wdhd1	2.98285	Cep57l1	0.308942	Prss44	1.82	Bckdha	0.209833
Fsbp	0.637307	Ksr1	2.98061	Gm6288	0.308855	Gm6225	1.82	Hmgn5	0.209819
Tph2	0.636566	Rtn4r	2.97002	Fam104a	0.308481	1810019N24Rik	1.82	Rora	0.209585
Rpa2	0.633497	Tpm2	2.96685	Brca1	0.308378	Ubox5	1.82	2500004C02Rik	0.209308
Cmah	0.632735	Topbp1	2.96326	Cdc7	0.308222	Dcps	1.82	Acer2	0.209156
Smim18	0.631488	Cklf	2.95836	Gm3248	0.308161	Gm16055	1.82	Eno4	0.208989
Rad18	0.630725	Ccdc77	2.958	Klhl3	0.308035	Npas2	1.82	Bcmo1	0.208934
Ung	0.630324	Stc1	2.94863	Mybl1	0.307947	5430416G10Rik	1.82	2410066E13Rik	0.208583
Hmgcs2	0.629644	Rgma	2.94759	C230062I16Rik	0.307864	Fam69a	1.81	Wdr52	0.208577
Zfp804a	0.629619	Ccdc15	2.9473	Vwa3b	0.307844	Txnl1	1.81	C1rl	0.208465
Btk	0.62892	Depdc7	2.94367	Strip2	0.306534	Erbb4	1.81	Necab2	0.208389
Sec11c	0.627274	2900055J20Rik	2.94103	Gm12184	0.306452	Lpcat2	1.81	Pcyt1b	0.208094
Gm14446	0.624702	E2f2	2.93903	Tmem169	0.305805	4832441B07Rik	1.81	Shcbp1	0.208079
Cep57l1	0.624011	Aipl1	2.93498	Hs6st2	0.305706	Fam181b	1.81	Aqp4	0.207712
Cdh24	0.623382	Lamb2	2.93197	Pak3	0.304752	Arsj	1.81	Rpain	0.207214
Wdhd1	0.623345	Dpf1	2.91897	Gpr35	0.304551	Dclk2	1.8	Lpcat3	0.206803
Timp1	0.62324	Dkk4	2.91672	Sbk2	0.30358	Exosc4	1.8	Pde5a	0.206576
Efcab9	0.621084	Cpa4	2.91622	Dync1i1	0.303209	5730420F10Rik	1.8	AI836003	0.206111
Nyap2	0.620802	6430531B16Rik	2.91469	Tlr4	0.302532	D3Wsu167e	1.8	Galns	0.205798
Rnase6	0.620172	Svopl	2.91459	Egr1	0.30222	Mir133b	1.8	Hnrnpa1	0.205693
Gm13031	0.619361	Grm4	2.91218	Cd300e	0.30206	Phxr2	1.8	Fras1	0.205691
Brca2	0.617927	Rhod	2.91008	Gpm6b	0.301398	Ncapd3	1.8	Taar1	0.20569
Plekhd1	0.617132	Kcnab2	2.90894	Cd22	0.301148	1700024P04Rik	1.8	Mcoln3	0.205598
4930513N10Rik	0.617123	Dck	2.90185	Scn3a	0.301091	4930517N10Rik	1.79	Rps18	0.205576
Bdnf	0.61711	Anubl1	2.89844	Tent5a	0.300412	Sh3bgr	1.79	Nme5	0.205464
Wdr90	0.616409	Cep57l1	2.89458	Ct55	0.29998	Kif5a	1.79	Cgn	0.20532
A230056P14Rik	0.616108	Gm7075	2.89421	Abca9	0.29971	Prrg1	1.79	Gpr116	0.204997
Crlf1	0.615616	Tst	2.89188	Gm14418	0.299378	Npr1	1.79	Slc37a1	0.204851
Incenp	0.615418	Aknad1	2.88587	Adra1a	0.298944	Cxcr6	1.79	Plk1s1	0.204783
Pfkfb1	0.614901	Fabp5	2.88087	Smc4	0.298648	Mcemp1	1.79	F5	0.204468
Styk1	0.614782	Rpa2	2.87747	Gm7046	0.298622	Camp	1.79	Pi4k2b	0.204447
Sox4	0.612307	Cpne9	2.87318	Samd12	0.298264	Vmn1r50	1.79	Rasgef1a	0.204427
Ybx2	0.6121	Pate2	2.87091	Xkr4	0.298201	Car3	1.79	Enpp6	0.204376
Dad1	0.611474	Cdh3	2.86692	Kif18a	0.29803	Ifna4	1.79	Sntb1	0.204258
Pcdhb21	0.609908	B3gnt7	2.86576	Ros1	0.298005	AU022537	1.79	C1ra	0.204129
Fkbp2	0.609903	Fjx1	2.86465	Aqp4	0.297834	Rad51	1.78	Map3k15	0.204092
Gbp10	0.60984	Mdc1	2.8638	Arhgap11a	0.2976	Iglv1	1.78	Acadl	0.203872
Necab2	0.609459	Sema5b	2.85834	Adam5	0.296741	Itsn1	1.78	AW551984	0.203517
Trpv6	0.608974	Dnmt1	2.85828	A330102I10Rik	0.296618	4631422I05Rik	1.78	Brca2	0.203284
Prkcsh	0.608758	Adcy7	2.8541	Gpr135	0.296489	Cd48	1.78	Sult1d1	0.203142
Il18bp	0.608671	Agrp	2.85085	Eri2	0.296347	Fgf14	1.78	Fbxo33	0.202965
Ipcef1	0.607858	Dlk2	2.84589	Gm26843	0.295817	3110062G12Rik	1.78	Fcgr4	0.202906
Nnmt	0.6074	Nos1ap	2.84293	C5ar1	0.295643	Ngfr	1.77	Fgf14	0.202755
Lrdd	0.60725	Cntnap5c	2.84269	Ntm	0.295596	Prph2	1.77	Rhbdl3	0.202579
Dnph1	0.606631	Chst2	2.83291	Ms4a7	0.295332	Pabpc6	1.77	Lhpp	0.202547
Tmed3	0.605554	Fam167a	2.82996	Fer1l6	0.294832	Arhgef1	1.77	S100z	0.202402
Wdfy4	0.605371	Gm10282	2.82993	Gm41349	0.294738	5730552O08Rik	1.77	4933417G07Rik	0.201787
Hapln4	0.605145	Slc45a1	2.82171	Gm9828	0.294458	Mroh1	1.77	Ly6h	0.201626
Gmfg	0.605122	Flt1	2.81548	1700029J07Rik	0.293768	Tll1	1.77	Dio1	0.201519
Rgs4	0.604767	Trim43c	2.81385	2810414N06Rik	0.293647	Sftpc	1.77	Cirbp	0.201514
Cep72	0.603232	G2e3	2.80759	E230029C05Rik	0.293294	Mcoln2	1.77	Itpr1	0.201498
Il21r	0.603166	Macc1	2.80332	Spata17	0.292842	Mael	1.77	Fmnl2	0.20116
Emr4	0.602954	Calcrl	2.7998	Dcaf1	0.292256	Efcab11	1.76	Glt25d2	0.200749
Itgal	0.601846	Ppfia4	2.79973	Tram1l1	0.29161	Top2a	1.76	Gpr142	0.200524
Nupr1	0.600281	1700001P01Rik	2.7996	Cer1	0.291299	Mast4	1.76	Gm11837	0.200294
AB124611	0.599885	Kcnmb4	2.79918	Ccr5	0.291038	5330423I11Rik	1.76	Cdkl5	0.200027
Adh7	0.599861	Ctc1	2.79429	Xlr3a	0.290963	March1	1.76	Calcoco1	0.1999
1700001G11Rik	0.598658	Gpr82	2.79033	Crtac1	0.290845	Gins1	1.76	Shisa2	0.199839
Sema3c	0.598378	Zfp101	2.78461	Onecut2	0.290513	Adcyap1	1.76	Cst6	0.199827
Eppk1	0.597614	Lrrc23	2.78206	Gm15489	0.290345	Sp5	1.76	Cbx7	0.199379
Ptprn	0.597609	Slc43a3	2.77811	Snapc1l	0.289869	Ercc8	1.76	Trpc4	0.198677
Gng12	0.597161	Mcm2	2.77703	Akap6	0.289862	D17Ertd589e	1.76	Ntn4	0.198599
Xrcc3	0.595207	Ncapd3	2.77657	Gm10037	0.289667	Slc2a13	1.75	Pcdhgc4	0.198462
11-Mar	0.59489	Gm10113	2.77372	Kif22	0.289662	Slc2a6	1.75	Aurka	0.198343
Tacc3	0.593138	Haus6	2.76677	4930448H16Rik	0.2892	Dntt	1.75	Cds1	0.197916
Sec61g	0.592781	Psmb11	2.76651	Slitrk6	0.288791	AU015148	1.75	Clcn5	0.197865
Nme2	0.592711	C1qtnf3	2.76612	Rmdn1	0.288201	Ube2u	1.75	Twsg1	0.197622
Kcnt2	0.592109	Bnipl	2.76428	Gm9949	0.287828	Syp	1.75	Klc3	0.197505
Atg9b	0.591893	Mbnl3	2.76206	Gm43205	0.2868	Zpbp2	1.75	Kcnk3	0.197376
Gm8615	0.590619	Ccdc46	2.75817	Kl	0.285966	Tmem207	1.75	Dnahc9	0.19705
Slc39a11	0.590123	Gm8251	2.75808	Gm5464	0.285721	Syk	1.75	Napepld	0.196891
Gemin6	0.589996	Stab1	2.75033	Atad2	0.285394	Gm12446	1.75	Per1	0.196862
Ccbl2	0.589786	Cdkn2a	2.74896	Akr1c14	0.284021	Srst	1.75	Cdnf	0.196805
Gm12250	0.589064	Gins3	2.74837	Gm43435	0.283811	Spata6	1.75	Fkbp5	0.196698
Cldn1	0.587633	Phxr4	2.74811	Tsga10	0.283459	Knstrn	1.74	Ces2e	0.196499
Retnlg	0.587107	She	2.74666	Sim1	0.283215	Ncaph	1.74	Rbmxl1	0.196393
Nckap5	0.586839	Sfmbt2	2.74302	Gm10814	0.282973	Tfap2c	1.74	H2-T23	0.19602
6430550D23Rik	0.586281	Hirip3	2.74229	Lat2	0.282607	Hif1an	1.74	Klf11	0.195997
Gast	0.584478	Aqp1	2.74041	Ube2u	0.28216	Ccdc183	1.73	Evpl	0.195694
Grap2	0.584205	Gstcd	2.73999	Plod2	0.281922	Pcdhb4	1.73	Chd1l	0.195083
Enkd1	0.584164	Rai14	2.737	Trpc4	0.281573	Rab3il1	1.73	St8sia2	0.195036
Rpn2	0.583391	C530008M17Rik	2.73672	2810002D19Rik	0.281567	Sptssb	1.73	Hpgds	0.194613
Gm10433	0.583325	Zranb3	2.73483	Zfp993	0.281366	Lemd3	1.73	Slc15a3	0.194488
C1rl	0.583267	Tiam1	2.73323	4732471J01Rik	0.28123	Tubgcp5	1.73	Usp51	0.194478
Pkdrej	0.582826	Gm7173	2.73264	Nr4a2	0.281055	Gstt4	1.73	Peli3	0.193606
Arl11	0.581654	Lin9	2.73088	Zfp182	0.28004	Mki67	1.72	Accs	0.193588
Traip	0.581542	Mcm6	2.73001	Prrx1	0.27962	Gm2011	1.72	Scn1b	0.193146
Madcam1	0.580842	Pomt1	2.72033	Slc38a6	0.279411	Clec12b	1.72	Luzp2	0.19307
Kcnmb1	0.579013	Cd300e	2.71913	Cc2d2b	0.279379	Il18rap	1.72	Gm16845	0.192777
Hip1r	0.578509	Zbed3	2.71631	Zfx	0.279361	Asxl3	1.72	Me3	0.192652
Gm4814	0.576383	Crip3	2.70999	Rps13-ps2	0.279308	Nlgn3	1.72	Nkain1	0.192381
Tmem48	0.576268	Fam72a	2.70598	Apoh	0.279079	4930459C07Rik	1.72	Ppy	0.192229
Lck	0.575779	4933427E11Rik	2.6991	Sgo1	0.27901	4933431K23Rik	1.72	Ndc80	0.192007
S100a8	0.575085	Sema5a	2.6968	Gfi1	0.278688	Lce1g	1.72	Apobec1	0.191762
Mapk4	0.574056	Slc2a4	2.69001	Arhgap42	0.278617	Them5	1.72	Atp2b4	0.191311
Gm11529	0.573625	Ccdc61	2.69	Cyren	0.278551	Nlrp4a	1.72	Gmpr	0.191295
Ffar1	0.573146	Acot7	2.68907	Gm7327	0.278173	Hdac8	1.72	Fas	0.191217
Tmem160	0.572402	Spag4	2.68748	Fcrls	0.27784	Sorcs1	1.71	Nrtn	0.190915
Sez6	0.572373	Epha5	2.68082	Nebl	0.277826	6430604M11Rik	1.71	Rsad2	0.190507
Coch	0.570057	Zbtb32	2.6801	Icam1	0.277375	Ccnb1ip1	1.71	Mov10	0.190382
Prdm14	0.569141	H2afv	2.67702	4930563E22Rik	0.277346	Plekha3	1.71	Bmp1	0.190355
Haus3	0.567579	Pcdh17	2.67672	Gm11769	0.27705	C1qtnf9	1.71	BC055324	0.19035
Dock2	0.567332	Fam132b	2.67454	Prom1	0.276826	4930444P10Rik	1.71	Adamts18	0.189943
1190003J15Rik	0.567328	Ng23	2.6731	Gm47936	0.276794	Adhfe1	1.71	Ppp1r17	0.18989
Il1rn	0.566525	Kcnj13	2.67297	Mcm8	0.276616	1700110I01Rik	1.71	1810062G17Rik	0.189598
Gm9767	0.565252	Aplf	2.67275	Mpeg1	0.276499	Itga5	1.71	Spats2	0.189586
Avpr1a	0.562063	Suv39h2	2.66963	Abca4	0.276466	Actrt1	1.71	Acads	0.189569
Napsa	0.561891	Dctpp1	2.66821	Grhl3	0.275906	Muc16	1.71	4930481A15Rik	0.189308
Haus4	0.561747	Tex11	2.66294	Map3k15	0.275412	D10Ertd494e	1.71	Oasl2	0.189094
Relt	0.560614	1300017J02Rik	2.6607	Plk-ps1	0.275131	6430628N08Rik	1.71	Cdkl1	0.188877
Tmem176a	0.560499	P4ha3	2.65712	Adamts17	0.274676	Hmgn1	1.71	Ednrb	0.188811
S1pr4	0.560089	Aim1	2.65361	Nlrc4	0.274651	C76938	1.71	3110070M22Rik	0.18869
Pcolce2	0.559565	Mro	2.65239	Gm7308	0.274419	Prg4	1.71	Btbd3	0.188621
Pcna	0.558258	Pcna-ps2	2.65236	Kcnb2	0.274357	2310034C09Rik	1.71	Mis18bp1	0.188565
Atp5g1	0.557593	Ccdc138	2.65124	Gm13526	0.274325	Cthrc1	1.7	AI597479	0.188282
Ulbp1	0.557389	Rad9	2.64828	Bend6	0.273708	Cenpi	1.7	B3gat1	0.18824
Cdc7	0.556826	9430020K01Rik	2.64642	Kcna2	0.273591	Habp2	1.7	Tgfbr3	0.188208
Tspan32	0.555528	BC053749	2.64578	Gpr173	0.273314	Pdc	1.7	Zbtb7c	0.188176
Pydc3	0.555451	Galk1	2.64548	Stap1	0.273301	Prdx6b	1.7	Eci2	0.18815
Slc9a5	0.554943	Ppm1m	2.64496	Kcnj10	0.272549	Slc6a11	1.7	Zfp580	0.18804
Nme1	0.554623	Pcnt	2.64306	Itgax	0.272492	Ckm	1.7	Zmat5	0.187926
Slc10a6	0.554251	Pcna	2.6375	Ppm1e	0.272469	Ccna1	1.7	Hepacam2	0.187589
Ppa1	0.553649	Mmp17	2.63448	Gm31834	0.272418	Slc6a20b	1.7	Rps6ka6	0.187582
Pycr1	0.553447	Hat1	2.63136	Cd36	0.27217	Enox1	1.69	Pklr	0.187429
Beta-s	0.552148	Ddah2	2.63002	Gm49980	0.272133	4930444G20Rik	1.69	Sytl3	0.187178
Hist1h1c	0.552136	Gtf2a1l	2.62221	Gm6277	0.272116	Mdn1	1.69	Ston2	0.187102
Mdh1b	0.549954	Wdr90	2.62061	Dcn	0.271925	Wls	1.69	Amy2b	0.186952
Spns3	0.549789	Abcg2	2.6204	Akap5	0.271749	Pde8b	1.69	Mical3	0.186938
Rpph1	0.549486	Lpar2	2.61914	4930579G24Rik	0.271227	Sgol1	1.69	Pomc	0.186829
Fn3k	0.549471	Dtymk	2.61669	Col4a4	0.270706	4930523O13Rik	1.69	Ifi44	0.186647
C030037D09Rik	0.548501	Pcdh12	2.60868	Stard9	0.270584	Adcyap1r1	1.69	Rnf141	0.185873
Hvcn1	0.548281	Exosc8	2.60692	Nucb2	0.27042	4930591A17Rik	1.69	Tdo2	0.18581
Clptm1l	0.547318	Ndufa4l2	2.60345	Gm29675	0.270046	Exoc1	1.69	Pole3	0.185698
Dctpp1	0.546483	Adap1	2.60089	Rab9b	0.269955	Lhfpl4	1.69	Muc4	0.185443
Parvg	0.546168	Cmc2	2.60072	Kcnn3	0.269921	Gm32641	1.69	Abca8b	0.185223
Cenpt	0.546112	Hsh2d	2.59583	Fam83b	0.269767	Il1f8	1.69	L3mbtl3	0.185134
Hspa1a	0.545094	Timp1	2.59525	Atad3aos	0.269241	2010300F17Rik	1.69	Ncoa7	0.184777
Fgd3	0.544172	Akap5	2.59491	Slc10a4l	0.269167	Itgal	1.69	Trim12c	0.184606
Krt23	0.543061	Bcl2l12	2.59374	Cabyr	0.268768	9030613N10Rik	1.69	Ltbp2	0.184399
Zfp367	0.54222	Pth1r	2.59276	Lrrtm4	0.268146	4921530L21Rik	1.69	Grin2c	0.184304
Kif18a	0.541312	Dynlt1a	2.59088	Gm29050	0.268071	Med29	1.68	Rap1gap2	0.184183
Ms4a6b	0.540854	Ano9	2.58947	Gsta1	0.26774	Blk	1.68	Casp6	0.184127
Cyp4f18	0.540796	D030056L22Rik	2.58158	Cdkl5	0.267434	D3Ertd229e	1.68	Cchcr1	0.184125
Edn1	0.540355	Mesp2	2.58136	Cenpi	0.267318	Tmem241	1.68	Rnf32	0.183761
Ubb	0.539918	Tpmt	2.57624	Rpl10-ps3	0.266887	6030440G07Rik	1.68	Itfg3	0.183688
D330045A20Rik	0.538719	Htr5b	2.57471	Grk5	0.266762	6030427F01Rik	1.68	Frs3	0.183656
Cklf	0.538445	4933408B17Rik	2.56967	Ino80b	0.266458	1700023B13Rik	1.68	A430105I19Rik	0.183474
Ttc39c	0.537147	Sypl2	2.56909	A330023F24Rik	0.265673	Trem3	1.68	Hspb6	0.183377
Pask	0.536895	Ccdc123	2.56759	Plcb1	0.265622	Gm3134	1.67	Spsb4	0.183335
Rnft2	0.53525	Prkcc	2.56337	Serpini1	0.265156	Dscc1	1.67	Gucy2c	0.183182
Fam107a	0.535042	Ets1	2.56154	Pcsk5	0.265145	Ptpa	1.67	Neurog3	0.18308
Cdkn2c	0.534997	Epb4.1l2	2.5609	Gm12592	0.264997	Ucn2	1.67	Sh3pxd2a	0.182801
Il18r1	0.534886	Tekt1	2.55787	Fcgr3	0.26489	Lmbr1	1.67	Hist1h1c	0.182723
H2-M2	0.531829	Dcaf15	2.55776	Klhdc9	0.264551	4930433M22Rik	1.67	Melk	0.182718
ORF63	0.531742	Fetub	2.55414	AC119183.1	0.26423	Boll	1.67	Chn1	0.182601
Gm9920	0.530629	Hyls1	2.55246	Gm47232	0.264119	C87312	1.67	Shroom4	0.182521
Actn3	0.530351	Fbln1	2.54932	A930015D03Rik	0.263268	1700048M11Rik	1.67	Nsa2	0.182216
Klhdc8a	0.530209	Nppc	2.54789	Arhgap30	0.263038	A930036A04Rik	1.67	Thsd1	0.181929
6530402F18Rik	0.529446	Psat1	2.54775	Snap91	0.262784	Guca2a	1.67	Plxna3	0.181822
Tmem258	0.529331	Grip2	2.54721	Gm28905	0.262487	1700016G14Rik	1.67	Bend3	0.181692
Cst6	0.528784	Podn	2.54487	Lars2	0.262468	4833405L11Rik	1.66	Arnt2	0.181645
Ube2u	0.527958	4930432K21Rik	2.54484	3110053B16Rik	0.262357	Defb4	1.66	Plin2	0.181556
P4hb	0.527734	Gm11149	2.54358	Pld4	0.262292	Clec18a	1.66	Chst8	0.181462
Loxl2	0.52763	Hmga2	2.54069	Lyz2	0.26181	Actn2	1.66	Cdca8	0.181156
Coro1a	0.527412	Atp1a2	2.5402	Tusc1	0.261746	Cfap61	1.66	Rgs16	0.181135
Trim59	0.526428	Hsd11b2	2.53974	Clec7a	0.261709	AU022855	1.66	Epha7	0.180821
Pkmyt1	0.525795	Slc47a2	2.5372	5033403F01Rik	0.261647	AA408396	1.66	Dock11	0.180712
Pik3cg	0.52507	Hist1h3b	2.53588	Gm38413	0.261283	March3	1.66	Dapl1	0.180605
2810055G20Rik	0.524763	Fgf13	2.52893	Reg3a	0.261259	2410137M14Rik	1.66	Nusap1	0.180385
Pim1	0.524573	Nes	2.52611	Kctd12b	0.261135	Gabra2	1.66	Mcm9	0.180127
Alox12b	0.524433	Csrnp3	2.52577	Mmp16	0.261061	Klrd1	1.66	D130017N08Rik	0.179977
Gabra5	0.523153	Cep135	2.52501	Gm13003	0.260921	4930562C15Rik	1.66	Mpp2	0.179367
Col16a1	0.522874	Cntrob	2.52476	Gm41556	0.260868	Prl8a2	1.66	Rgs17	0.179344
Atp2c2	0.522279	Pxdn	2.52441	Gm47414	0.260789	Ikzf3	1.66	Samd14	0.17933
Pitrm1	0.520326	Ceacam16	2.52376	Gm36543	0.259388	Cdc25c	1.66	Ispd	0.179101
B230216N24Rik	0.519829	Vmn1r51	2.52353	Gm36371	0.259204	Brinp3	1.66	Gnai1	0.179058
Krtcap2	0.51931	Adamts10	2.52268	Kif26b	0.258912	4930449A18Rik	1.65	2010111I01Rik	0.179053
Flt3	0.518497	Tnfrsf19	2.52261	Erich6	0.258805	AU022751	1.65	Bard1	0.179019
Alas2	0.517885	Epha8	2.52209	Fkbp7	0.258625	2310005A03Rik	1.65	Socs2	0.178913
Tmem147	0.516993	Tinf2	2.52147	Lrch2	0.258484	4930528A17Rik	1.65	Bst2	0.178897
Mmp7	0.516814	Nup155	2.52116	Gm12669	0.258306	6720482G16Rik	1.65	Lphn3	0.178784
Gzma	0.516391	Hs3st2	2.51525	Liph	0.257702	Platr4	1.65	Osbpl5	0.178654
Gfap	0.515647	Adra1a	2.511	Bmpr1b	0.257603	1700016H13Rik	1.65	Tmem63c	0.178601
Pxdc1	0.514871	2610028H24Rik	2.50909	H2-Aa	0.25752	AI616248	1.65	Mre11a	0.178318
Aldh1l2	0.514821	Akd1	2.50558	Stpg2	0.257453	C77144	1.64	Glp1r	0.178282
Pon3	0.514304	Gm6843	2.5053	Hnmt	0.257357	Nsg1	1.64	Naprt1	0.178256
Ust	0.513989	Slc45a3	2.50454	Nr4a1	0.257215	9330185C12Rik	1.64	Iqgap3	0.178194
Olfr558	0.512451	Steap3	2.50387	Gm13594	0.256685	Zfp526	1.64	Ndufab1	0.177982
Alg8	0.511682	Prss57	2.50375	Plch1	0.256581	Tnfsf13os	1.64	Hectd2	0.177945
4931408D14Rik	0.511307	Lrrc3	2.50136	Trim59	0.256255	Sh3tc1	1.64	Mmrn2	0.177912
Pabpc1l	0.511111	Cdk19	2.50021	Ttc14	0.255245	Ulbp1	1.64	Slc38a5	0.177868
Phf11a	0.511062	Cep110	2.49924	Gm26691	0.255237	Gm36401	1.64	4632428C04Rik	0.17777
Zfp804b	0.511046	Nudt1	2.49867	Fbln5	0.255126	AU022436	1.64	Cdk5rap2	0.177763
A930007I19Rik	0.510489	Casp7	2.49844	Dock10	0.254469	Npy2r	1.64	Akr1c14	0.177664
Try5	0.510423	Dscaml1	2.49788	Gm14429	0.254414	Mup3	1.64	Ephb1	0.177427
Gm19345	0.510131	AA467197	2.49749	Cdh8	0.254086	Ube2c	1.63	Cdo1	0.1774
Atad5	0.50999	2810459M11Rik	2.49717	Kif24	0.254059	Cp	1.63	Erich1	0.177394
Itgb7	0.508509	Rfc3	2.49549	Gm19026	0.25388	Tnni2	1.63	Asap3	0.177195
Fam210b	0.508407	Bcl11b	2.49517	Gm43305	0.253674	Ighg3	1.63	9430091E24Rik	0.176779
Glra1	0.507974	Kpna2	2.49408	Gem	0.253553	Auh	1.63	Bex1	0.176672
2010109A12Rik	0.507427	Nxt1	2.49116	Kif20a	0.253106	Cma1	1.63	Brwd3	0.176663
Retnla	0.506227	Gm13308	2.49028	Casp1	0.252723	Gm9947	1.63	1700013G23Rik	0.176602
Fancg	0.506019	Maz	2.49028	Gm48102	0.25253	Sema3d	1.63	Siah2	0.176585
Dtx1	0.50572	Podnl1	2.4882	Gm43672	0.25247	Zfp389	1.62	Defb1	0.176585
Pomt1	0.505473	Amhr2	2.48602	Gm47398	0.252337	Cep55	1.62	Slc24a2	0.176515
Cdk6	0.5054	Ctxn1	2.47673	Gm50252	0.251992	Evi2a	1.62	Cfi	0.176496
Blm	0.504942	Tmpo	2.47624	Gatm	0.25192	Sucla2	1.62	Rnf114	0.176396
Ccdc13	0.503401	Pih1d1	2.4748	Col20a1	0.251865	Gh	1.62	Ucp2	0.176218
Def6	0.503249	Arpp21	2.4653	Slco2b1	0.251861	Klra2	1.62	Vipr2	0.176074
Nxph3	0.503159	Gltp	2.46507	Ccdc138	0.251722	Clec10a	1.62	Zfp608	0.175992
Fuom	0.502795	Dut	2.46353	Gli3	0.251153	Kif20b	1.62	Zrsr1	0.175854
H2-T24	0.502634	Paqr4	2.46314	BC037032	0.250911	Asph	1.62	Sema6c	0.175757
Rbl1	0.501589	Arl5c	2.46022	Cd44	0.250599	Slc26a3	1.61	Itgb8	0.1756
Cox6b2	0.501094	Gm1673	2.45801	Tex26	0.25043	Otos	1.61	Zc3h10	0.175513
Slfn10-ps	0.500979	St8sia4	2.45556	Lrrc6	0.250145	Gm11544	1.61	Kcnk12	0.175455
Lsp1	0.500008	2700049A03Rik	2.45449	Lncpint	0.249942	2610105M22Rik	1.61	Mlycd	0.175293
3930402G23Rik	0.499468	Odf3l1	2.45367	Gm41664	0.249832	4930579D07Rik	1.61	Akt3	0.175251
Akr1d1	0.499364	Tipin	2.45037	Gm12996	0.249769	Ptgfr	1.61	Rgs12	0.175168
Mif	0.499095	2610020H08Rik	2.44909	Ddx11	0.249542	Vmn1r58	1.61	Cdx4	0.17513
Plin2	0.498943	Gemin6	2.44718	Pde1c	0.249475	4930447F24Rik	1.61	Smarca1	0.175094
Gm11570	0.498734	Bgn	2.44337	Gm10221	0.249228	4921524L21Rik	1.61	Traf4	0.175012
Gm2762	0.498632	Flna	2.44082	Rab30	0.249062	Dmrtc2	1.61	Ect2	0.175009
Fam78a	0.498469	Gm514	2.4389	Zfp72	0.248537	4930434B07Rik	1.61	B3gnt3	0.174858
4632434I11Rik	0.498139	Naa38	2.43813	Smc2	0.248457	Kcna6	1.6	Efnb3	0.174805
Mtag2	0.49796	Gm11435	2.43145	Gm26616	0.248421	Hoxb4	1.6	Rtn2	0.174725
Arhgdib	0.497943	Msh5	2.42425	Gm28455	0.24835	Bub1	1.6	2310033P09Rik	0.17472
4930452B06Rik	0.496147	Neto2	2.4236	Atp5l2-ps	0.24831	Sp110	1.6	Gc	0.174319
Rgs2	0.49604	Fen1	2.42268	Fam83d	0.248078	C78128	1.6	Tigd5	0.174195
Cmbl	0.49509	Rnf144a	2.42221	Slc35f1	0.247993	Phf2	1.6	Rab39	0.174121
Sec61b	0.495074	Mtl5	2.42153	Gm10433	0.247964	Kcnk7	1.6	C1galt1	0.174112
Cd3g	0.494555	Gabre	2.41981	Syt4	0.247909	Lrr1	1.6	A230072E10Rik	0.173958
Wnt5b	0.494523	Gm5263	2.41311	Mterf2	0.247463	Klra7	1.6	Slc16a10	0.173892
Rsg1	0.494445	Eng	2.41181	Tnfrsf26	0.246915	Zbp1	1.6	Tceb2	0.173874
Calr	0.494321	Fam81a	2.40851	Gm5844	0.246806	1700047M11Rik	1.6	Tipin	0.173839
Lad1	0.493552	Ccdc69	2.40654	Rtkn2	0.246736	Lsm11	1.6	Etl4	0.173777
Ddost	0.493506	Dusp27	2.40336	Slc35f3	0.246463	Evc2	1.6	Aloxe3	0.173765
Ankrd55	0.493427	Chst14	2.39624	Ap3m1-ps	0.246287	2610311E24Rik	1.6	Zdhhc20	0.173322
Glipr2	0.493122	Slc24a5	2.3962	Epsti1	0.246117	Atp6v0a4	1.6	Gm2382	0.17326
Gpr141	0.492653	L3mbtl2	2.39501	Fam189a1	0.245837	9030409C19Rik	1.6	Met	0.173165
Cyp4a32	0.492555	P2rx3	2.39392	Gm49085	0.24583	Hnrnpl	1.6	Reps2	0.173
Wdr76	0.492173	Lmf2	2.39089	Jam2	0.245708	Pbk	1.59	Eppk1	0.172784
Gm7008	0.492112	Ankrd2	2.39063	Gabrg1	0.245545	5430440P10Rik	1.59	Zfp651	0.172635
1810011H11Rik	0.491288	3425401B19Rik	2.38802	Ankef1	0.245304	Ppm1n	1.59	Zranb1	0.172466
1110019D14Rik	0.491041	Gm8113	2.38775	Gm12500	0.244811	Ccdc177	1.59	Hoxb3	0.172424
3300002I08Rik	0.489977	Fbxl8	2.37871	Ccdc148	0.244196	5830435N06Rik	1.59	Gas8	0.172368
Prim1	0.489902	Uevld	2.37825	Sacs	0.244091	Gm11627	1.59	Fkbp1b	0.172351
5830403M04Rik	0.48834	Fads3	2.37598	Gm8228	0.244027	Txnl4a	1.59	Pde12	0.172325
Slc12a8	0.48748	Evi2b	2.37483	Oxtr	0.243907	C230004F18Rik	1.59	Tm4sf4	0.172128
Fpr2	0.487106	Lmtk3	2.37325	Atp10d	0.243887	4930578M01Rik	1.59	Pdzrn4	0.171766
Apobec1	0.486721	Irf8	2.36775	Tnfaip3	0.243857	Htr2c	1.59	Fgd6	0.171559
Pemt	0.486278	Gm6104	2.36716	Zfp879	0.243487	Ano3	1.59	Avpr1b	0.171541
Rfc5	0.485398	Rad50	2.36626	5730405O15Rik	0.243286	Rab8b	1.59	Fam81a	0.17148
2310001H17Rik	0.483727	2010002N04Rik	2.36462	Zfp131	0.243186	9530002O20Rik	1.59	Vat1l	0.171432
Chac1	0.482882	Ube2s	2.36379	Rsph4a	0.243018	LOC434348	1.59	Heg1	0.171097
Ffar2	0.482128	Pcdh19	2.3625	Gm9762	0.243003	Cdca5	1.58	2610035D17Rik	0.170831
Nkg7	0.48178	Pmp22	2.36106	Chm	0.242895	4930444E06Rik	1.58	Hdac8	0.170702
Pcsk1	0.480702	Ppp1r18	2.3552	Gm20275	0.242496	Lbx1	1.58	Ccdc48	0.170641
Ergic1	0.480281	Spc25	2.35477	Pappa2	0.242294	C130073F10Rik	1.58	Ncoa6	0.170586
Il7r	0.479969	Nnat	2.35309	Cd300a	0.242278	5033415L01Rik	1.58	Kcnd2	0.170227
D330041H03Rik	0.479606	Ism2	2.35305	Vnn3	0.242225	Tada3	1.58	Fam113b	0.170122
Zfp456	0.478922	Rasl12	2.35086	Rad51	0.241863	Snrpd3	1.58	Ggn	0.169916
Ptprc	0.478419	Mospd3	2.34873	Efhc2	0.241803	0610042E11Rik	1.58	Nfyc	0.169901
Arhgap36	0.477954	Cer1	2.34218	A230072E10Rik	0.241611	Fzd9	1.58	Mreg	0.169756
Rnf182	0.47708	Hist2h2ac	2.34059	Colec12	0.241368	Gm19277	1.58	St18	0.169669
D630041G03Rik	0.475962	Lin54	2.33616	AI593442	0.241069	Nhlh1	1.58	1700001L05Rik	0.169626
Gapdh	0.475553	Ptgs1	2.33154	Lipa	0.240857	Wdr66	1.58	F2	0.169572
Mis18a	0.475495	Rfc5	2.33153	Mad2l1	0.240839	Matn1	1.58	Smug1	0.16954
Hist1h3i	0.47543	Xkr9	2.32944	Arsk	0.240725	C80060	1.58	Anxa11	0.16944
Syk	0.474792	BC005764	2.32469	Ccr1	0.240636	Maml2	1.58	Zfp93	0.16922
Rfc2	0.474497	Snai2	2.32384	Sytl5	0.24043	Slc22a7	1.58	Nebl	0.169052
Cycs	0.474214	Rtel1	2.32337	Zfp771	0.240416	C530030P08Rik	1.58	Fbl	0.169048
Tram2	0.47414	Arhgap18	2.32319	Cd109	0.240374	Kdm5c	1.58	Cyp4f39	0.168941
Nrg4	0.473617	Tuba1c	2.32001	Idi1	0.239852	Ppp1r16b	1.57	Rpl37	0.16884
Haus8	0.472768	Olfml2b	2.31443	Cep70	0.239673	4933407I18Rik	1.57	Ngef	0.168763
Sh2d2a	0.472337	Syk	2.3141	Polk	0.23965	Tex24	1.57	Ushbp1	0.168656
Tube1	0.472069	Serpinf1	2.30862	Map7d2	0.239511	4930434J08Rik	1.57	Gpr62	0.168458
Myo1g	0.472049	Fmnl3	2.30714	Dnah7b	0.239479	Krtap19-5	1.57	Pla2g2f	0.168437
Fkbp5	0.471652	Lgr5	2.3065	Sp3os	0.23925	Zswim5	1.57	Decr1	0.168215
Gabbr2	0.471516	Haus5	2.30517	Slc35a3	0.239214	1700056N10Rik	1.57	Pih1d2	0.168125
Mpp6	0.471337	Gstm6	2.30271	Cdc20	0.239063	Tmpo	1.57	Rbp4	0.168095
Pgk1	0.471187	Acbd7	2.30263	Cyb5r2	0.239032	D11Ertd506e	1.57	Mecom	0.167876
Gm17762	0.470815	4930503L19Rik	2.30259	Zfp536	0.238937	Hesx1	1.57	Rpusd2	0.167531
Tuba1c	0.470661	Gm10720	2.30092	Chsy3	0.238659	A730041O05Rik	1.57	Rnf113a1	0.167461
Usp2	0.470467	Fv1	2.29848	Dnaaf1	0.238309	Hsbp1	1.56	Foxj2	0.167321
Rdh12	0.470192	S100z	2.29694	Cldn18	0.238029	Acacb	1.56	Faim	0.1671
Sycn	0.470088	Mycn	2.29658	Slc37a2	0.237724	Lonrf3	1.56	Hjurp	0.166885
Tmem108	0.469756	Homer3	2.29378	Adcy7	0.237712	Elf4	1.56	Trim56	0.166849
Cmc2	0.469148	H2afz	2.29359	Mx2	0.237103	C330027C09Rik	1.56	Aldh9a1	0.166807
Gm19705	0.468799	Fut2	2.29117	Coro1a	0.236905	Agr3	1.56	Chaf1b	0.166769
B4galnt1	0.468557	1700054N08Rik	2.29111	Csf3r	0.236857	Gm2087	1.56	Hells	0.166751
Kirrel3	0.467912	Tmem190	2.29095	Fchsd2	0.236793	2900057C01Rik	1.56	Abcc3	0.166741
Dlk1	0.467205	Nrl	2.29072	Rad18	0.236769	2810403D21Rik	1.56	5430425J12Rik	0.166656
Fam84a	0.467169	Cyp46a1	2.28854	Kcnd2	0.236279	5830468K08Rik	1.56	Glul	0.166648
4930520O04Rik	0.466713	Ckap5	2.28771	Gm15860	0.236216	Synpr	1.55	Mki67	0.16656
Pcdha1	0.466229	Nfatc2ip	2.28578	Spdl1	0.236171	Slc46a2	1.55	6430598A04Rik	0.166548
Calca	0.466139	Prrt4	2.28343	Gm37226	0.235863	Dlgap3	1.55	Ffar1	0.166447
Nkain1	0.466129	Tcf7	2.28227	Lpcat2	0.235835	Serpinb9c	1.55	Csad	0.166381
Arhgap30	0.464498	Eif4ebp3	2.28227	Epm2aip1	0.23537	AU021884	1.55	Pcsk6	0.166036
Uqcr11	0.464463	Stk33	2.28204	C1galt1	0.235098	Jakmip2	1.55	Zswim7	0.166032
Fbxo5	0.464432	Rasgrp3	2.28204	Gm29687	0.235056	Parpbp	1.55	Scgn	0.165756
Tmem179	0.464271	Pcdh10	2.27873	Shc4	0.234808	Fam3b	1.55	Ttc39c	0.165665
Acp5	0.463352	Fcamr	2.27544	6820408C15Rik	0.234632	C79015	1.55	Gabbr2	0.165609
Tmem150a	0.462948	Gm6614	2.27544	Gm38393	0.233824	Dhrs2	1.55	Itpr2	0.165595
Zfp296	0.462671	Piwil2	2.27516	Gm15879	0.233511	Il1f10	1.55	Cdh4	0.165545
Ell3	0.462085	Ptms	2.26942	Hey1	0.233445	Gata5os	1.55	Pdk2	0.16545
Nos1ap	0.461903	Fzr1	2.26871	Rel	0.233329	Vmn2r84	1.55	Ddr1	0.165184
Gdf11	0.461882	Mtr	2.26828	Cd200	0.233098	Trav9d-3	1.54	Tnfsf13b	0.165172
Rfc3	0.461404	Gm1568	2.26552	Scn2a	0.233038	Tspan33	1.54	Sgol2	0.165144
Wee2	0.460914	1700123I01Rik	2.26534	Gm26947	0.232972	Atr	1.54	1810043G02Rik	0.16486
Asb11	0.460491	Srpx2	2.26534	Dkk2	0.232596	C78282	1.54	Slc6a6	0.164859
Crp	0.459875	Myoc	2.26525	Sulf1	0.232003	Alx1	1.54	Dyrk3	0.164839
Gbp5	0.459654	3200002M19Rik	2.26499	Capn7	0.231867	1700011L22Rik	1.54	Krt7	0.164611
Plk4	0.458679	Hist1h2af	2.26469	Gm26618	0.231751	Pcdh12	1.54	Kcnj8	0.164499
Syt5	0.458494	Chrne	2.26026	Gpr165	0.231501	Lemd1	1.54	Cblc	0.164485
Cenpv	0.457436	Cntnap4	2.25979	Hdx	0.231422	Fut2	1.54	Cd274	0.164395
Alb	0.457432	Piwil1	2.25979	Zdhhc22	0.231272	Il15	1.54	Erc2	0.164261
Myo7b	0.457332	Tigd3	2.25784	Basp1	0.230907	Ly6d	1.54	Ncapd3	0.164086
Tmem154	0.456307	Alas2	2.2548	Vps13b	0.230843	Ptafr	1.54	Ifit3	0.163975
1810008I18Rik	0.456233	B3gnt8	2.2508	A930012O16Rik	0.230039	Prl7d1	1.54	Unc45b	0.163922
Cit	0.455029	Tsnaxip1	2.25049	B130046B21Rik	0.22986	7030407E18Rik	1.53	Adh1	0.163822
Batf	0.454752	AB124611	2.24939	Zfp189	0.229778	Sirpb1a	1.53	Adamts5	0.163671
Tmem176b	0.454581	Bmp8a	2.24895	Lmo1	0.229734	Adamts5	1.53	Cyp46a1	0.163155
4930556M19Rik	0.454535	Cyp2s1	2.24769	Lair1	0.229573	2300004M11Rik	1.53	Nuf2	0.16311
Fsd1	0.453975	Bmp7	2.24727	Ccdc39	0.229337	Cemip	1.53	A430071A18Rik	0.163011
Nlrc5	0.453608	Adcy10	2.24655	Gm43032	0.229323	Tpbpa	1.53	Cacna2d1	0.163008
Smarca5-ps	0.452847	Aldh8a1	2.24225	Gm45786	0.228857	Cd177	1.53	Nckap5l	0.162836
Ccne1	0.452576	Zfp473	2.24186	Lzts3	0.228633	4931403M11Rik	1.53	Fbxl21	0.162755
Fam5b	0.452248	Sun2	2.23443	Gm10420	0.22826	1700034O15Rik	1.53	Fam135b	0.162489
Xrcc2	0.452035	Chad	2.23303	Gm14546	0.228129	Cog4	1.53	1810044D09Rik	0.162478
Ssr2	0.452029	Xylt1	2.22886	AC241534.1	0.227829	1700021N20Rik	1.53	Lrrtm4	0.162413
1110020A21Rik	0.451542	Fbln7	2.22772	Gm16712	0.227787	Wipi1	1.52	Renbp	0.161855
Sdcbp2	0.451258	Eddm3b	2.2276	4930568A12Rik	0.227484	Mdfi	1.52	Arid5b	0.16164
B4galnt3	0.451004	Rnf157	2.22262	Tmem71	0.227383	Pmp2	1.52	Slc4a10	0.161613
Ncf4	0.450612	Crisp2	2.2222	Pi4k2b	0.227108	Cd1d2	1.52	Ifit1	0.161576
Edn2	0.449795	Rnaseh2b	2.22138	Gbp2	0.226948	Six3os1	1.52	Lig1	0.161473
S100a9	0.44919	Prkd3	2.21921	Cd180	0.226928	2210407C18Rik	1.52	Ghr	0.161357
Gm20754	0.449116	Pom121	2.21897	Coch	0.226901	4930532J02Rik	1.52	Ccdc68	0.161354
Kynu	0.448865	Mdga1	2.21706	Gm14322	0.226891	Zfp264	1.52	Sstr3	0.161183
Pstpip1	0.448861	Nup85	2.21532	Pi16	0.226444	9530025H10Rik	1.52	Msi2	0.161015
Mx1	0.448812	Ppm1n	2.2131	Vegfd	0.225587	Tbc1d21	1.52	Atp8b5	0.160976
Rprml	0.448608	Tmem138	2.21017	Uprt	0.225524	4933430I17Rik	1.52	Xrn1	0.160823
Mcoln3	0.448544	6720489N17Rik	2.20695	Gm36298	0.22534	C80171	1.52	Irx2	0.16081
Fbxl7	0.448497	Fgf1	2.20603	Cdh23	0.225297	1700080N15Rik	1.52	Ube2v1	0.160793
Nomo1	0.447766	Evx1	2.20487	Tmc7	0.225174	Hoxd11	1.52	Pappa2	0.160664
Arhgap4	0.447057	Sord	2.20396	Pcsk1	0.22508	Olfr68	1.52	Mfsd6l	0.160604
Rab17	0.446753	Svep1	2.20082	Car5b	0.224864	Hsd17b1	1.52	Ifitm1	0.160569
Smc4	0.446431	Lrat	2.19969	Nlgn3	0.224307	Il18bp	1.51	Ubtd1	0.160537
Degs2	0.446411	Mzf1	2.19623	Olfr1366	0.224265	Gadd45a	1.51	Il17re	0.160045
Dach2	0.446321	Ptchd2	2.19349	Cbln3	0.224241	3830417A13Rik	1.51	Gpr179	0.159987
Cgn	0.445818	Zfp599	2.19295	5730507C01Rik	0.223763	Rbp2	1.51	Plcb1	0.159954
1600029D21Rik	0.445818	Gm3550	2.19142	1700008O03Rik	0.223636	Camsap2	1.51	Maff	0.159841
Rpp25	0.445248	Gemin4	2.1889	Rps6ka6	0.223447	Smpdl3b	1.51	Havcr2	0.159832
Rpl41	0.445208	Myzap	2.18837	Gm32123	0.223337	A930009L07Rik	1.51	Zwilch	0.159763
Ntrk2	0.444863	Sp110	2.18837	Dnah2	0.222798	Sele	1.51	D5Ertd579e	0.159676
Fam83d	0.444588	Oas1d	2.18777	Usp34	0.222767	Slc4a1	1.51	Uhrf1bp1	0.159648
Pdia3	0.444134	Cntnap1	2.18748	Gpr119	0.22253	Lipe	1.51	Baz2b	0.159545
LOC100504608	0.442932	Gm10123	2.18673	B230303A05Rik	0.222498	Gpr83	1.51	Ddx60	0.159202
Grem2	0.442595	Jmjd5	2.18533	P2rx3	0.222243	Fut9	1.51	Mkl2	0.159037
Slc2a12	0.44237	Car9	2.18311	Tmem51os1	0.22204	Kcnab3	1.51	Cnot6l	0.158851
Dio1	0.441852	Chek1	2.18158	Aadat	0.221802	Gfi1	1.51	Cyp4f17	0.158822
Rps2	0.441625	Col4a5	2.18054	Rexo5	0.221792	C80865	1.51	Col6a5	0.158754
Mettl7a1	0.441448	Wnt10b	2.17783	Smpdl3b	0.221544	AI429363	1.51	Gm8234	0.158588
Trpc7	0.44073	Cep97	2.17749	Cxcr4	0.22147	Rad51ap1	1.5	Oxtr	0.158363
Lif	0.440724	Elf4	2.1773	Dsc2	0.221444	4933404M09Rik	1.5	Akap17b	0.158249
Ar	0.440157	Ptch2	2.17473	Ift57	0.221361	Thoc1	1.5	Klhdc8a	0.158228
Habp2	0.439942	Bik	2.17111	Rgs9	0.221024	1700039M15Rik	1.5	Zfp498	0.158132
E130309F12Rik	0.439227	Rcsd1	2.16981	Kcnc4	0.220658	Kbtbd6	1.5	Tnr	0.157989
Gm14085	0.439059	Tbc1d25	2.16914	Dcst1	0.220638	D8Ertd124e	1.5	6330408A02Rik	0.157985
Dennd1c	0.43896	Lmnb2	2.16888	Rp2	0.22019	Dnaic2	1.5	Zfand1	0.157968
Klf11	0.438848	Ypel1	2.16735	Cd59a	0.220076	5830424K16Rik	1.5	Hipk2	0.15796
Selm	0.438686	Jakmip2	2.16726	Nim1k	0.219924	2310026I22Rik	1.5	Specc1l	0.157776
Fam222a	0.438345	Ido1	2.16722	Taok1	0.219802	Snapc4	1.5	Cep76	0.157681
Serpina1a	0.43767	Sntb1	2.16662	Il1b	0.219281	Tpm3	1.5	Ptk2b	0.157474
Oas1a	0.43745	Inhbe	2.16603	Etv1	0.219166	Dusp27	1.5	Tox	0.157234
Znf41-ps	0.437404	Tesk2	2.16206	Gm5105	0.219137	Gm29805	1.5	Zkscan2	0.15696
Aaas	0.437087	Daf2	2.16102	Fancc	0.219071	Adamts12	1.5	Serinc5	0.156912
Scnn1a	0.436707	Nedd1	2.1605	Egf	0.21897	Tmem200c	1.5	Limd2	0.156896
Dlgap3	0.436587	Gm6907	2.16044	Tpmt	0.218707	Cnr2	1.5	Gm10451	0.156765
Ppil1	0.435187	Trp53	2.16006	4930597O21Rik	0.21836	Foxo4	1.49	Srgap1	0.156636
Spn	0.434961	C230052I12Rik	2.15964	Ldb2	0.218142	Dhcr7	1.49	Cdhr1	0.156607
Comtd1	0.434331	Nup205	2.15444	Desi2	0.218104	Cox20	1.49	Zfp366	0.156516
Arhgef26	0.432473	Eri1	2.15067	Pbrm1	0.217863	Izumo1r	1.49	D4Wsu53e	0.156291
Ccne2	0.431749	1500035N22Rik	2.14895	Lrch3	0.217714	Zfp352	1.49	Zfp667	0.156222
Tex30	0.43169	Ntn1	2.14671	2500004C02Rik	0.216971	Olfr157	1.49	Dis3	0.155958
Errfi1	0.431378	Ugt2b36	2.14328	Tmem88b	0.21688	AU024581	1.49	AI427809	0.155685
Otoa	0.430733	Morc1	2.1406	Ska2	0.216591	Timd2	1.49	Nuak2	0.155662
Vnn1	0.429733	Spdya	2.14027	Gm21399	0.216375	4930449C09Rik	1.49	Casr	0.155256
Rpn1	0.429523	F7	2.13718	Ptprd	0.216148	A730009L09Rik	1.48	Rgs7	0.155003
Blnk	0.429489	Pradc1	2.13431	Gm49376	0.216094	D2Ertd210e	1.48	Adora1	0.154613
Hmox1	0.429281	Polh	2.13419	Iqgap2	0.215965	Gm17455	1.48	Kcnmb2	0.154593
Abcb6	0.428908	1700001L19Rik	2.13366	BC065397	0.215846	3110002H16Rik	1.48	Vsig10	0.154485
Rerg	0.428812	Tmem144	2.12889	Kcnj8	0.215629	Rgs8	1.48	Vwa5b1	0.154467
Met	0.428657	Magi3	2.12757	C130013H08Rik	0.215511	Atg3	1.48	A230051G13Rik	0.154429
Tlr1	0.428137	Qrich2	2.12633	Cfap70	0.215491	Tbc1d1	1.48	Sulf1	0.154365
Cmpk2	0.42805	Ccne2	2.12578	B130055M24Rik	0.215345	Dmrt1	1.48	Cdyl	0.15429
Timm8a1	0.427449	Pold2	2.12443	Bin2	0.215239	Col22a1	1.48	Eif2c1	0.154208
Dsc3	0.426829	Ptgr1	2.1223	Ppil6	0.21513	D7Ertd481e	1.48	Diras1	0.154147
Slamf7	0.426457	St8sia2	2.12108	Fv1	0.214976	Zfp385b	1.48	Akap1	0.154041
Rnaseh2b	0.426446	Alk	2.12037	3110083C13Rik	0.214972	4930485E13Rik	1.48	Wdr44	0.153603
Chrnb1	0.426221	Hmgb3	2.11978	Mef2a	0.214834	AU015858	1.48	Mrvi1	0.153591
Sult1a1	0.426191	Ogg1	2.11919	Gm5493	0.214753	Rptn	1.48	Cand2	0.153514
Igfals	0.426166	Syne2	2.1188	Cd96	0.214161	Il1f5	1.48	Gstt2	0.153449
Ikzf1	0.426163	Nasp	2.11696	Palb2	0.214034	Adamts20	1.48	Peli2	0.153322
Arhgap19	0.425434	Cep192	2.11634	Psme4	0.214014	1700034I23Rik	1.48	Car4	0.153307
Fetub	0.425352	Filip1l	2.11546	Lin28a	0.21342	Shcbp1	1.47	Tmem189	0.153268
Itgb2	0.425183	2310046K01Rik	2.11466	Slc25a36	0.21333	D930028M14Rik	1.47	Ino80b	0.153018
Ikzf3	0.425081	Mcm4	2.1133	Rasa3	0.212869	Lrrfip1	1.47	Plk1	0.152868
Chid1	0.424982	Smagp	2.1129	C3ar1	0.212713	Spatc1l	1.47	Nek10	0.152829
Gprc5a	0.424917	Gm10320	2.11266	Arf4os	0.212688	Map3k9	1.47	Zfp174	0.152808
Inhbb	0.424409	Batf3	2.11196	Mirg	0.212684	Chfr	1.47	Nsun3	0.152634
Lin9	0.423987	Dfnb59	2.11076	6030443J06Rik	0.212541	4930500A05Rik	1.47	Zc3h12b	0.15254
Ndufc2	0.423711	Podxl	2.11058	Map2	0.212439	Lman1l	1.47	Rc3h1	0.152515
Cpt1a	0.423484	Hist1h2ae	2.10847	Zfp174	0.212392	Stom	1.47	1110058L19Rik	0.152485
Pex5l	0.423377	Spp2	2.10784	AI506816	0.212344	Tmc5	1.47	Xdh	0.152484
Ndufa4	0.422966	Tubg1	2.1072	Nhlrc1	0.212325	Fpr1	1.47	Mtmr7	0.152415
Ckb	0.422414	Hist1h3g	2.10559	Dnah10	0.212307	2700022O18Rik	1.47	Ank3	0.152124
Aass	0.421588	Mlkl	2.10395	Slc26a2	0.211989	9230110F11Rik	1.47	Slc2a10	0.15205
Pcdh20	0.421231	Arl4c	2.09765	Ankrd26	0.211904	Vmn1r13	1.47	Wdr62	0.151958
Lgalsl	0.420448	Gimap9	2.09658	Cfap69	0.21187	Lefty2	1.47	Psg16	0.151911
Ldlrad3	0.420284	Wdr54	2.09588	Kantr	0.211716	Thsd7b	1.47	Myo5b	0.151827
Gpr108	0.420154	Car13	2.09362	Lgr6	0.211652	Tshr	1.47	Lpgat1	0.151811
Vkorc1	0.419017	Cnn1	2.09124	Ptpre	0.211533	Fignl1	1.46	Atf7	0.151778
AI413582	0.418163	Zfp819	2.09116	Stk26	0.211521	Cspg5	1.46	Rbm11	0.15169
Daam1	0.417944	Ncan	2.08975	Gm43379	0.211287	Hells	1.46	3110009E18Rik	0.151608
Sh2b2	0.417639	Nfe2l3	2.08838	Fam78a	0.211266	Gdf11	1.46	Stac3	0.151547
Sorl1	0.417179	Als2cl	2.08735	D3Ertd751e	0.211223	D5Ertd163e	1.46	Madd	0.151266
Tmem51as1	0.416727	Nup107	2.08624	Acbd7	0.211098	A930033C23Rik	1.46	Gm9899	0.151239
Nmral1	0.416105	Tmsb10	2.085	Ska3	0.210966	Ccdc182	1.46	2310061J03Rik	0.151166
Tnfsf9	0.416101	Mapk13	2.08421	4930404H11Rik	0.21096	Ints6	1.46	Abcb6	0.151117
Btg1	0.415096	Tagap1	2.08344	Ttc41	0.210359	AU022320	1.46	Plekha4	0.150914
Eif4ebp1	0.414933	Sh2d4a	2.08206	Rbm12b1	0.210109	Il17re	1.46	Avl9	0.150838
Cabp1	0.414704	Gm6169	2.08096	Gm50303	0.209992	Pfkp	1.46	Rnf24	0.150773
Actrt3	0.414589	Sh3bgrl2	2.08019	Fbp2	0.209842	Xylt2	1.46	Rps3a	0.150509
Fam57a	0.414404	Fam122b	2.07872	Atp8b1	0.209805	Syce2	1.45	Klhl24	0.150309
Spag1	0.413966	Dpysl5	2.07829	Primpol	0.209776	Ndc80	1.45	Glcci1	0.150295
Tmem208	0.41389	Vwa3a	2.07692	Atp13a3	0.209532	Nrm	1.45	Ugt8a	0.150273
Serpinb1a	0.413869	Fam100b	2.07635	Kcnj3	0.209382	Cd209b	1.45	E130102H24Rik	0.150149
Ypel2	0.41291	Cbx2	2.07583	Taar1	0.209115	Cryzl1	1.45	Pde4d	0.150126
Fam83b	0.412674	Cby1	2.07502	Greb1l	0.209103	Kif18a	1.45	Gpr137b	0.150091
Rhd	0.41262	Nt5dc2	2.07411	Cd302	0.209058	Plxna4	1.45	Gpsm2	0.150068
Alg12	0.412549	Pde1a	2.07371	Cep85l	0.208757	Foxk1	1.45	Prkcb	0.150066
Gnpda1	0.412301	Sh3pxd2b	2.06856	Thrb	0.208746	Tmem100	1.45	Cenpl	0.150023
Abca4	0.41183	Slc24a1	2.06756	Marcks	0.208738	Vmn1r14	1.45	Lix1l	0.150019
Dmbt1	0.411751	Emp3	2.06681	Tnr	0.208169	Clec4a2	1.45	Fam13a	0.149855
Dynlt1a	0.411694	Gm7367	2.06666	Prlr	0.208065	Tbx18	1.45	9930021J03Rik	0.149841
Gm3435	0.411648	Mpp2	2.06407	Gm36839	0.208018	D330022H12Rik	1.45	Kif27	0.149764
Dpm3	0.411537	Tmed1	2.06389	1700001L05Rik	0.207875	Gm28729	1.45	Atf7ip	0.149725
Pter	0.411335	Gm10722	2.06375	Tmem198b	0.207829	Tspan32	1.45	Neu2	0.149595
C2cd4a	0.411273	Sgip1	2.05878	Cfap73	0.207718	Tmprss11e	1.45	Herc3	0.149575
Cyp4f39	0.410954	Cacna2d2	2.05825	Ldlrad3	0.207458	Cntn3	1.44	Hlf	0.149547
5031414D18Rik	0.410671	Slbp	2.05657	Trim7	0.20717	Naa35	1.44	Otud7b	0.149506
Rps15a-ps6	0.41029	Adam5	2.05575	Cd52	0.206997	Miox	1.44	Tjp2	0.149449
Nucb1	0.410113	4933407L21Rik	2.05543	Kcnk12	0.20692	Dock2	1.44	4932416H05Rik	0.149431
Selplg	0.409891	Mdfic	2.05466	Ifitm10	0.20683	2310067E19Rik	1.44	Mzt2	0.149421
Tipin	0.409735	Tmem145	2.05465	Ddx19b	0.206741	Lrrc8e	1.44	Prkd2	0.149398
Rin3	0.408517	Ssna1	2.05416	Tex30	0.206174	2210409E12Rik	1.44	Tcp11l2	0.149045
Ctse	0.408183	Prdx4	2.05277	B230217O12Rik	0.206148	Tmco5b	1.44	Pappa	0.149042
Rplp0	0.408157	Cxcl12	2.05193	Zim1	0.205994	Ercc6l	1.43	Tiam1	0.148975
Fam212b	0.407529	Gm9008	2.04917	4933427E11Rik	0.205836	Nags	1.43	Abtb1	0.14891
AI463170	0.407284	Hspb6	2.04587	A830073O21Rik	0.205583	Dnaaf5	1.43	Ikzf4	0.148824
Basp1	0.407038	X99384	2.0455	Mrc1	0.205503	Tmem200a	1.43	Rnf152	0.148801
Slc38a8	0.406677	Ppap2a	2.04331	Gemin6	0.205253	Avp	1.43	Smoc2	0.1488
Kcnj6	0.406364	Emr4	2.0417	Slco1a6	0.20524	Papln	1.43	Cox4i2	0.148761
Gramd2	0.406313	Dnajc9	2.03733	Tmeff2	0.205124	9530086O07Rik	1.43	Nptxr	0.148735
Ccdc34	0.406018	Fzd1	2.03721	Zfp429	0.205113	AU015621	1.43	Synpo2	0.148684
Olfr1033	0.406002	Itpripl1	2.03405	Fbxl21	0.205067	4932412D23Rik	1.43	9430021M05Rik	0.148651
Il16	0.405874	Dhrs3	2.03394	Phtf1os	0.205027	5830405M20Rik	1.43	Plekhg1	0.148615
Cenpl	0.405522	Gm2897	2.03306	C820005J03Rik	0.204956	Lrrc34	1.43	Gemin6	0.148583
Ndufa1	0.405232	Kcnj6	2.03218	Ralgapa1	0.204852	Slc25a54	1.43	Heph	0.148537
Cd48	0.405137	Snrpd1	2.03119	Pcsk2os1	0.204747	Pcdh19	1.43	Spire1	0.148489
Myo16	0.4048	Dmkn	2.02919	Hmgcll1	0.204605	Brip1	1.43	Zfp111	0.148413
Tuba1b	0.403834	Cep250	2.02873	Insl6	0.204508	Siglecg	1.43	Gm20554	0.148307
Kcnb2	0.403597	Snrnp25	2.02197	Igsf1	0.204164	D930050J11	1.43	Cep170	0.148221
2900002K06Rik	0.40358	Sult2b1	2.01662	1110019D14Rik	0.204082	9130024F11Rik	1.43	Pou2f1	0.14819
Haus5	0.403279	Rpa3	2.01596	Mpc1	0.203964	Cops3	1.42	Cd300lg	0.148159
Sp100	0.402842	Gpr63	2.01548	Atp7b	0.203962	Tmem184c	1.42	Azi1	0.148123
Ccdc85a	0.402707	1700037H04Rik	2.01459	Zfp982	0.203933	Ctsa	1.42	Gm1943	0.148074
Dap	0.402492	Zfp808	2.01236	Ap3s1	0.203897	6720483E21Rik	1.42	Lsm6	0.147768
Adcy1	0.402255	Oscp1	2.01048	Gm16008	0.203616	Panx3	1.42	Tmem86a	0.147601
Tmem29	0.401291	Fbn1	2.01042	Ccdc88a	0.203439	Ephb6	1.42	Cacng4	0.147559
Jph2	0.401254	Begain	2.00977	Zfp354c	0.203408	Klra21	1.42	Maml2	0.147296
Cdkn2b	0.400487	Rasip1	2.00883	Slc22a2	0.203401	1700011H14Rik	1.42	Adamts9	0.147266
4931440P22Rik	0.400332	Gm3788	2.00568	Mpdz	0.203364	Henmt1	1.42	Herc6	0.147089
2700081L22Rik	0.40031	Gm7535	2.00536	Kctd12	0.203015	Ctla4	1.42	Ppp1r10	0.147026
Os9	0.400208	Fgd1	2.00109	Tdrd5	0.202911	Speer8-ps1	1.42	AU021092	0.146894
A530072M11Rik	0.399684	Vrk1	1.99983	Fsd1l	0.202631	Dpm3	1.42	Tbl1x	0.146813
Tgtp1	0.39957	Tmem98	1.99612	Adgb	0.202574	Hrnr	1.42	1810048J11Rik	0.146792
Tns4	0.399516	Fcho1	1.99601	Gm14584	0.202387	D16Ertd472e	1.41	Dyx1c1	0.146782
Gpr89	0.399181	Mad1l1	1.99476	Gm48860	0.202346	Pkmyt1	1.41	Heca	0.146715
Gm5547	0.398103	Alyref	1.99443	Ptgs1	0.202214	C3	1.41	1110054M08Rik	0.146561
Gm3558	0.397664	Alg13	1.99434	C330011M18Rik	0.202189	Cd300a	1.41	Ube2l6	0.14656
1-Mar	0.397455	Mylk4	1.99353	Gm14305	0.202144	D1Ertd218e	1.41	Frzb	0.146192
Irf7	0.397062	Lrch4,Lrch4.1	1.99352	Slc39a10	0.20214	Ccr3	1.41	Kcnu1	0.146067
Elmo1	0.396421	Cngb1	1.9934	Gm12397	0.201972	Cilp2	1.41	Eif2ak2	0.145988
Ralgapa2	0.396363	Map3k6	1.99299	Eef1akmt3	0.201795	1700042O10Rik	1.41	Ffar2	0.145964
Gpr183	0.395978	Hdgf	1.992	Dhrs13os	0.201063	Tcrg-V4	1.41	Rpl39	0.145638
Gcat	0.395965	Rab13	1.98819	9430015G10Rik	0.20102	Cage1	1.41	E130317F20Rik	0.145636
St8sia1	0.395703	Tbx2	1.98705	Ptgs2	0.200966	1700018P08Rik	1.41	Trpm5	0.145611
Slc25a20	0.395219	Ncaph2	1.98574	Casp12	0.200748	Pcdh7	1.41	Phldb2	0.145453
Neto2	0.394305	Srl	1.98529	Pm20d2	0.200728	Zik1	1.41	Gm166	0.145445
5730522E02Rik	0.394298	Sema3f	1.98459	Laptm5	0.200449	Lkaaear1	1.41	Tbc1d22a	0.145221
3000002C10Rik	0.394053	Kank3	1.98388	Hbp1	0.200421	Serpinb8	1.41	Eif2ak4	0.145185
Ncf1	0.393952	Gm4737	1.98241	Dpp10	0.200205	Tpx2	1.4	Itgax	0.145178
Tlr7	0.393597	Alox5	1.98145	Il7r	0.200065	Krt84	1.4	4933426M11Rik	0.145106
4930599N23Rik	0.393398	4930522L14Rik	1.98074	Gm11767	0.199951	Cdkn3	1.4	Ptms	0.144956
Stom	0.393077	Coro1a	1.97876	Cdkn2b	0.199886	4933403L11Rik	1.4	Slc38a11	0.144874
Lilra5	0.392938	Snrpe	1.97775	Cyp7b1	0.199665	Rbm38	1.4	Ccdc46	0.144703
Ddit4l	0.392803	Rad51c	1.97692	Btg3	0.199531	1700008K24Rik	1.4	Dnajc17	0.144667
Poc1a	0.39256	Nup133	1.97178	Tspan2os	0.199476	Fscn1	1.4	Eltd1	0.144443
Stra13	0.392344	Mmp23	1.96975	3010001F23Rik	0.199456	Lcp1	1.4	Nkapl	0.144387
Tmprss4	0.391617	Cdca7	1.96891	Caprin2	0.199372	Slco6b1	1.4	1700010I14Rik	0.144357
Gyltl1b	0.391536	Ysk4	1.9686	Vsnl1	0.199223	Gm9748	1.4	Ppap2a	0.144312
Mmp9	0.391417	Arhgap10	1.96808	Ly6a	0.199174	C86544	1.4	Kcna5	0.144264
Chchd10	0.391397	4933404M02Rik	1.96751	B230119M05Rik	0.199155	Lipn	1.4	Ctnnd2	0.144199
Ifi30	0.391384	Ppih	1.96609	Zfp738	0.19915	Pde6a	1.4	Wash	0.144081
Epn3	0.390871	Nup37	1.96591	Tasor2	0.199071	Wnk2	1.4	Tymp	0.144038
Npdc1	0.390652	Insl6	1.96549	Zfp280d	0.199058	Was	1.4	Ctu1	0.144012
Fam183b	0.390611	BC051628	1.96531	Bend4	0.198879	4732416N19Rik	1.4	Cntln	0.143951
Myo10	0.390563	Zmynd17	1.96393	Gm31518	0.198852	Ifna5	1.4	Rp9	0.143719
Qsox1	0.390497	Areg	1.96385	Rem2	0.198847	A530053G22Rik	1.4	Fam70a	0.143706
A730020E08Rik	0.390399	Foxa1	1.9634	Trim36	0.198845	Ybx2	1.4	Crbn	0.143695
Cbx2	0.389397	Ern2	1.96157	Gm26826	0.198693	Igfbp5	1.39	Hdc	0.143625
Pcdhac1	0.389078	Pcp4l1	1.96143	Adal	0.198658	1700008O03Rik	1.39	Cyp27b1	0.143562
Adora2b	0.388598	Bend6	1.95879	Adam23	0.198582	N4bp2l2	1.39	Tnfaip3	0.143553
Glipr1	0.388261	Cdca4	1.95829	Upf3b	0.198311	9330179C17Rik	1.39	Gnpda2	0.143503
Mcoln1	0.388096	Aldh16a1	1.95816	Asah2	0.198298	Plxnc1	1.39	9030418K01Rik	0.143476
Gm14379	0.388027	Gm10047	1.95715	Rb1	0.198268	Atp8b4	1.39	Rnaseh2c	0.14342
Aldh5a1	0.387662	Barx2	1.9566	Sash3	0.198173	2610028D06Rik	1.39	Sox6	0.143343
Nmnat3	0.387576	Nup62	1.95621	2810429I04Rik	0.198109	Tpsb2	1.39	Gm10432	0.14313
Syne4	0.38738	Rfc2	1.95599	Cdca5	0.197878	2310002L09Rik	1.39	Slc36a4	0.143003
Cdpf1	0.386599	5930416I19Rik	1.95474	Nudt6	0.197876	Gm10791	1.39	Slc25a26	0.14289
Gmnn	0.386538	Lrrk1	1.95386	Pon3	0.197791	6330510M09Rik	1.39	Fmo2	0.142876
Nkain4	0.386517	Slitrk2	1.95364	Gm16090	0.197785	Cish	1.38	Rps14	0.14286
Slc16a6	0.386437	Rbbp8	1.95226	1700008J07Rik	0.197766	9430069I07Rik	1.38	Snapc5	0.142753
Acat1	0.386156	Ankrd32	1.95037	Cc2d2a	0.19755	Ubash3a	1.38	Usp49	0.142621
Tuba4a	0.386057	P2rx2	1.95031	Trim30a	0.197521	Hoxc4	1.38	Cdk1	0.142539
Mutyh	0.385962	Srgap2	1.95014	Hepacam2	0.197348	Clip2	1.38	D3Bwg0562e	0.142242
Ppih	0.385694	Crlf1	1.94917	St6gal2	0.197288	Satb2	1.38	Nudt21	0.142193
Cd180	0.385257	Calm2	1.94894	Cep170	0.197074	Gpnmb	1.38	Hscb	0.14218
Leo1	0.385216	Plek2	1.94821	Efna2	0.196783	Ugt3a2	1.38	Syt14	0.142134
Ybx1	0.385139	Nab2	1.94576	Zfp458	0.196753	Trp53rkb	1.38	E030030I06Rik	0.14211
Tat	0.383772	Ccdc158	1.94542	Gm42547	0.196534	AW047481	1.38	Cpn1	0.142053
Ifi47	0.383285	Fam55b	1.94477	Tubd1	0.196446	Krt13	1.38	Phf23	0.141896
Sez6l2	0.38318	4930524J08Rik	1.94272	Steap1	0.196396	Ssx2ip	1.38	Dtx3l	0.141835
Sec14l1	0.38268	Banf1	1.94151	Pik3c2a	0.196283	Hdhd1a	1.38	Uaca	0.141664
Ahcy	0.381839	Lhx3	1.93755	Pabpc5	0.196239	Gm94	1.38	Tmem119	0.141646
Dna2	0.381838	Gm6904	1.93344	Pir	0.196159	Hmmr	1.37	A930004D18Rik	0.141627
Cyb561	0.381522	Terf1	1.93085	Gbp5	0.196148	Car15	1.37	4922501C03Rik	0.141592
Arhgef19	0.381311	Lor	1.92975	Ccdc112	0.195811	Kif1bp	1.37	Fam57b	0.14149
Gm16197	0.381057	Agpat9	1.92916	Glrx	0.195796	Slc39a8	1.37	D630045J12Rik	0.141455
Gm16998	0.380827	Gm16314	1.92893	Pnma1	0.195611	A830082K12Rik	1.37	Apof	0.141395
Zfand4	0.380696	Tm6sf1	1.92823	Gm19324	0.195609	Cyfip2	1.37	4930441O14Rik	0.140984
Cited4	0.379996	Cyp2r1	1.92745	Ftl1-ps1	0.195548	Galr2	1.37	Dsp	0.140913
Lrmp	0.379449	BC067074	1.92744	Kcnk2	0.195498	D530039A21Rik	1.37	Gabarapl1	0.140736
Vps37b	0.378981	Figf	1.92638	Dab2	0.195324	D15Ertd492e	1.37	Ccnf	0.140346
Atp4a	0.378937	Msn	1.92604	Gm11837	0.195067	Aldoart1	1.37	Cno	0.140226
Hsd3b7	0.378534	Gja4	1.92599	Ascc3	0.195018	5430414B12Rik	1.37	Ank	0.140211
Nup85	0.378319	Zfp850	1.92529	Rassf10	0.194695	Bspry	1.37	Spata9	0.140209
Gpr160	0.378304	Necab3	1.92477	Zfp964	0.194694	Gm38462	1.37	C77370	0.140162
Copz2	0.378186	Cpne2	1.92466	Egr3	0.194669	Morc1	1.37	Tmem29	0.140073
Cox7c	0.378088	Fcgr4	1.92305	Prkg1	0.194275	Kif20a	1.36	Grhl1	0.140067
Gpr156	0.377715	Scn1a	1.92291	Gm19391	0.194235	5330417H12Rik	1.36	Stat3	0.140026
Ints10	0.377372	Hist1h1e	1.92169	Fancb	0.194167	D730048M19Rik	1.36	Trim62	0.139953
Rpl35	0.37736	Gm16380	1.91954	Oasl2	0.194161	Rftn2	1.36	Ptprk	0.139904
Tigd3	0.377333	Nrip3	1.91748	Herc6	0.194156	Golgb1	1.36	Acvr2b	0.139875
1810019D21Rik	0.3769	Ccdc102a	1.91691	Rundc3b	0.193933	Trim61	1.36	Map3k8	0.139865
Leprel1	0.376867	Vrk2	1.91611	Arhgap19	0.193916	Homer1	1.36	Gcg	0.139839
Cox6a1	0.376628	6330503K22Rik	1.91406	Kcnq3	0.193809	Psma6	1.36	Ptpn3	0.1398
Pcdha9	0.376561	Kcne2	1.91158	Pcdha1	0.193771	4921511H03Rik	1.36	Ift46	0.139787
Abcg3	0.376524	Psd2	1.91151	Arhgap6	0.193585	Stc2	1.36	Rap1gap	0.139742
Prrt3	0.376241	Cdh12	1.9114	9330159F19Rik	0.193455	Aqp4	1.35	Mtap2	0.139464
Lmcd1	0.375712	BC025446	1.91111	Itpr2	0.193327	Tcl1b1	1.35	1110008F13Rik	0.139452
Hyou1	0.37571	Zan	1.91089	Rfx6	0.193079	Sept12	1.35	Gatsl2	0.139411
Serpinb6b	0.374528	Apbb1ip	1.91065	Cldn2	0.193076	Tmc1	1.35	Rph3al	0.139395
Dhrs7	0.374468	Gjc1	1.91065	9930021J03Rik	0.193019	Ccdc74a	1.35	Vps37d	0.139328
Dgkh	0.374171	Plau	1.91036	9230116N13Rik	0.192775	Alox5	1.35	Plau	0.139327
Gbp8	0.374135	Zfp185	1.90985	1700063D05Rik	0.192586	Ndc1	1.35	Htra2	0.139225
Bcmo1	0.373788	4930523C07Rik	1.90416	Gab3	0.192498	Gli3	1.35	Pbk	0.139136
Tnip1	0.373423	Samd1	1.9017	Foxp2	0.192311	Akap3	1.35	AI428936	0.139135
Alg3	0.373348	Ptplad2	1.90154	Gm13136	0.192278	1700067K01Rik	1.35	Nfatc2	0.139037
Lcp2	0.373325	Ccdc163	1.90076	Lpgat1	0.192188	Ifna9	1.35	Slfn5	0.138977
Grhl1	0.373256	Dock10	1.89777	4932438A13Rik	0.192183	LOC102634590	1.35	Rbp7	0.138761
Anxa9	0.37317	Ppp2r5d	1.8961	Fbxl12	0.191963	Kcnk15	1.35	Med12l	0.138659
Phlda1	0.373085	Armc2	1.89231	Eda	0.191827	1600015I10Rik	1.35	Etfa	0.138656
Morc4	0.373082	Gm6430	1.88907	Zfp992	0.191743	Extl3	1.35	Ppfibp1	0.138641
Hdhd3	0.372829	0610010K14Rik	1.88354	AW112010	0.191589	Adamts10	1.35	Ubxn11	0.138617
Isg20	0.372829	Caprin2	1.88197	Syngr4	0.191526	Mcm5	1.34	Wnt2b	0.138501
Cdk2	0.372423	Bub3	1.8819	Bhlhb9	0.191159	Slc39a14	1.34	Rapgef3	0.138383
AI607873	0.372229	Mst1r	1.88162	Dleu2	0.191117	Wdr48	1.34	Fktn	0.138372
6430562O15Rik	0.372145	Vmn2r1	1.8811	Gm10073	0.191045	Cmtm2a	1.34	Klf2	0.138363
Gck	0.372119	Ccdc21	1.88012	Csnk2a3	0.190843	Foxf2	1.34	Zfp52	0.138309
Mrpl14	0.370948	Myl6b	1.87986	Slc36a4	0.190671	Neto2	1.34	Emid1	0.138184
Hsp90b1	0.370782	Senp1	1.87831	Nbeal1	0.190636	Gm12606	1.34	Slc7a14	0.138168
Tmem184a	0.370714	Cbx5	1.87612	2500002B13Rik	0.190543	2410049M19Rik	1.34	Dennd4c	0.138052
Traf3ip3	0.370703	Plp2	1.87449	Gm26782	0.190493	Trim43a	1.34	Csrp2	0.138028
Adra2a	0.370673	Ccdc33	1.87323	Gm36445	0.190395	Cstf1	1.34	1110012J17Rik	0.138025
Usp43	0.37044	Anxa3	1.87228	Rad51c	0.19039	Spag6	1.34	2010003O02Rik	0.137999
Dhrs4	0.370235	Lipg	1.87228	Pik3cg	0.189984	Nxnl2	1.34	Sez6l	0.137897
Chgb	0.37016	Slco4c1	1.87228	Cacna1b	0.189974	4933422A05Rik	1.34	Lrrc28	0.13787
Gpr45	0.369969	Hsf4	1.8715	Cfap206	0.189841	Smcp	1.34	Zswim5	0.137802
Gm4787	0.369634	Usp1	1.87144	H2-Eb1	0.189834	Fmo2	1.33	Zfp704	0.137774
4933406I18Rik	0.369505	Megf10	1.86929	Wwp1	0.189825	Rin1	1.33	Galnt12	0.137752
1700013G23Rik	0.368973	Notch2	1.86677	Lyplal1	0.189683	Rab26	1.33	Mfap2	0.13753
Scamp3	0.368963	Hist1h2bj	1.86518	Plek	0.18959	Gykl1	1.33	Fam38b	0.137473
4930413G21Rik	0.368896	Ccdc39	1.86468	Senp7	0.189467	Bcl11b	1.33	Cecr6	0.137322
Ccnh	0.368709	BC052040	1.86318	Gm9833	0.189346	Aldh3a1	1.33	Drap1	0.137273
Fam135b	0.368691	Ppp1r35	1.8629	Tas1r1	0.189205	4930511J24Rik	1.33	Marcks	0.137217
Isoc2a	0.368655	March10	1.86124	Mid2	0.189043	Pidd1	1.33	Rasd1	0.136882
Slc38a5	0.368514	Wibg	1.85839	Elovl4	0.188862	Samd7	1.33	Gpd1	0.136834
C2cd4b	0.368455	Lrrk2	1.85834	Gm26693	0.18864	Astn2	1.33	6430571L13Rik	0.136789
Lingo1	0.368447	Mrpl53	1.85777	Gm10501	0.188527	Mark4	1.33	Dagla	0.136733
Lsm4	0.368234	Rhebl1	1.85759	Cyp4x1	0.188523	Spi16	1.33	Atp2b2	0.136692
5033406O09Rik	0.368202	Nphp4	1.85685	Rian	0.188494	A230091C14Rik	1.33	Plk2	0.136619
Ccdc169	0.368129	Card10	1.85491	Lockd	0.188306	Gpr61	1.33	Kif15	0.136552
Cd86	0.367863	Cntln	1.85382	C2cd3	0.188163	Mrgprb1	1.33	Kcnn2	0.136537
C1qtnf1	0.367791	Ppp1r14a	1.85012	AA388235	0.187942	Ttyh1	1.32	Ldb1	0.136534
Sdc1	0.367645	Slc12a3	1.85012	Olfr558	0.187915	Ect2	1.32	Nedd4l	0.136516
Slc35b1	0.367594	Unc13d	1.84965	Mttp	0.187825	Cenpe	1.32	Tctn1	0.136511
Hexa	0.367498	Bcas1	1.84819	Kdm7a	0.187778	Mis18bp1	1.32	1700037C18Rik	0.136479
Cope	0.367282	Spata24	1.84671	Pdyn	0.1877	A930004D18Rik	1.32	Ttll5	0.136449
Hist1h4k	0.367091	Rfwd3	1.84443	G2e3	0.187588	Adh6b	1.32	Tspan33	0.136386
Chia	0.367073	Ptprcap	1.84245	Zfp318	0.187458	Tmem191c	1.32	E2f1	0.136279
Inpp4b	0.366653	Pfn1	1.84007	Rfc4	0.187393	Eif4ebp2	1.32	Ip6k2	0.136259
Abhd6	0.36651	Sclt1	1.83945	Slc2a13	0.187109	Arhgef11	1.32	Agphd1	0.136201
Lcp1	0.366335	Hsd17b14	1.83861	Lin9	0.186988	G6pd2	1.32	Sh3yl1	0.136122
Rnaseh2a	0.366276	Lonrf3	1.83661	Zfp367	0.186983	AU021977	1.32	Ccdc61	0.13591
Dtymk	0.366184	Abca9	1.83558	Zmynd12	0.186884	C630001G18Rik	1.32	Atad5	0.135859
B2m	0.365986	Slc6a20b	1.83397	4930452B06Rik	0.186804	4933411K16Rik	1.32	Xylt1	0.135824
Pcdhb15	0.365904	Fads2	1.83343	Gm19710	0.186741	4930405G09Rik	1.32	Cdc42bpg	0.135653
Plxnc1	0.365753	Apba2	1.82996	Cenpq	0.186622	Paqr5	1.32	Eef1g	0.135582
Klf15	0.365651	2610528E23Rik	1.82914	Reps2	0.186499	Cd302	1.32	Noxo1	0.135571
Ptger4	0.365559	A730068I03Rik	1.82269	Rnasel	0.186425	Nmrk2	1.32	4930570G19Rik	0.135414
Pygo1	0.365542	Ghsr	1.82089	Minar1	0.18638	AU015536	1.32	Mgat5	0.135264
Me3	0.365503	1600002H07Rik	1.8205	Tifa	0.186347	Slfn3	1.32	Lck	0.13518
Uggt1	0.365346	Gdf11	1.81866	Rps25-ps1	0.186151	9630002D21Rik	1.32	Armc10	0.135106
Defb1	0.36525	Selenbp2	1.81751	Gm10069	0.186105	Dock5	1.32	Adamts12	0.13507
Gm15910	0.365183	Serp2	1.8172	Akr1c19	0.186034	Slc50a1	1.31	Sept4	0.135061
A1cf	0.365148	Saal1	1.81456	Sp100	0.185996	Brca1	1.31	Scnn1g	0.134829
Sdpr	0.364869	Sept6	1.81328	Parp8	0.185959	Dnah12	1.31	Fam196a	0.134737
Aqp7	0.364832	Net1	1.81231	Brca2	0.185855	D17H6S56E-5	1.31	Fbxo27	0.134726
Ccdc106	0.364799	Ranbp17	1.81075	Gabbr2	0.185812	D19Ertd200e	1.31	Smc4	0.134707
Pxmp2	0.364761	Tmem194b	1.80593	C730034F03Rik	0.185733	4933423N03Rik	1.31	Hsd17b13	0.134656
Hspb6	0.363644	Bmp6	1.80522	Deptor	0.185694	5430430B14Rik	1.31	BC057022	0.13462
Sorbs2	0.363509	Ptn	1.80375	B230369F24Rik	0.185589	9230112J17Rik	1.31	Irx1	0.134579
Bcl3	0.363464	Agbl2	1.80139	Ankrd22	0.185508	Popdc3	1.31	Klc4	0.134504
Rpl7a	0.363329	Sae1	1.80008	Nova1	0.185486	Gm7444	1.31	Gm1614	0.134438
Grm1	0.363258	Crabp1	1.79978	Cdnf	0.185303	Fam184b	1.31	Iigp1	0.134295
Tnfrsf1a	0.363	Pms2	1.79624	Glmn	0.185029	Vmn1r15	1.31	Map3k13	0.134294
Bckdk	0.362585	Wdr76	1.79609	Tshz3	0.184776	Vsig2	1.31	Tanc2	0.134273
Tubg1	0.36243	Mphosph9	1.7958	Gm42944	0.184276	LOC624295	1.31	Polr3gl	0.134223
Gadd45g	0.361947	Snx31	1.79532	Tmem45b	0.184245	Krt36	1.31	Nin	0.13412
F13a1	0.36189	Mon1b	1.79512	Gm15506	0.184204	Gabra6	1.31	Arhgap44	0.134081
Traf5	0.36171	1700022I11Rik	1.79473	Atp8a1	0.184024	Hba-x	1.31	Rnf113a2	0.134026
Phgdh	0.361557	Gda	1.79426	Apobec1	0.183842	1700008P02Rik	1.31	Grtp1	0.134
Eepd1	0.361413	Ankmy1	1.79325	Runx1	0.183695	4932416J16Rik	1.31	Lepr	0.133995
Sstr2	0.361275	Cpt1c	1.79306	Racgap1	0.183692	Ankrd66	1.31	Pip4k2a	0.133931
9430021M05Rik	0.361147	1700125D06Rik	1.7919	Vamp9	0.183597	Tmem236	1.31	Tapbp	0.133862
Mpi	0.361054	Hmgn2	1.79154	Ccdc89	0.183405	Vcl	1.31	Tmtc1	0.13382
Pcdhb12	0.360934	Rbm38	1.79078	G730003C15Rik	0.183393	Gm40568	1.31	Sgce	0.133508
Phlda3	0.360449	Gm8787	1.79064	Gm5182	0.183239	Atp6v1g1	1.31	Gm5567	0.133434
Mbp	0.360387	Zfp385a	1.7905	Crbn	0.183182	Nbeal1	1.31	A930001N09Rik	0.133417
Cd14	0.360093	Casp8	1.78777	Mylpf	0.183113	Trim63	1.31	Hpse	0.133376
Qpctl	0.359998	Ptgis	1.78748	Sbk3	0.18311	Dab1	1.3	Ccdc80	0.133359
Chst8	0.359954	Wdr66	1.78502	Col4a3bp	0.183054	Gm34729	1.3	Wiz	0.133167
1-Sep	0.359852	Pabpn1l	1.7836	Gm14410	0.182822	Comp	1.3	Ptov1	0.13278
Ppapdc1b	0.359147	Wnt5b	1.78321	Pgap1	0.182818	Vash2	1.3	Rpl27a	0.132765
Entpd1	0.358627	Dapk2	1.78178	Rnls	0.18274	Grp	1.3	Isl1	0.132733
Slc40a1	0.358274	Gm6133	1.78108	Hcrtr2	0.18265	Gmeb2	1.3	Fry	0.132623
Plac8	0.358033	Hepacam	1.7807	Gm49708	0.182647	Tmem252	1.3	Tspan8	0.13254
Bcl2a1b	0.35757	Trat1	1.7807	Sec11c	0.182582	Sik2	1.3	Slc25a13	0.132529
2310008H04Rik	0.357342	1700011A15Rik	1.78002	Gm15638	0.182512	Gpr35	1.3	Cyp4v3	0.132455
Sncaip	0.356999	Ccdc36	1.77813	Gm9768	0.182023	4933435C09Rik	1.3	Pcnt	0.13244
Uck2	0.356968	H2-Q7	1.77812	Cacng7	0.181732	Ttc21a	1.3	Slc25a32	0.132423
Ifi44	0.356733	Iyd	1.77742	Gm19265	0.181687	D5Ertd521e	1.3	Gp5	0.132345
Hs6st1	0.356597	Fut10	1.77566	Gm27003	0.181487	Gm12169	1.3	Bbs1	0.132291
Erp29	0.356464	Gm10115	1.77242	Mx1	0.181467	4930564D02Rik	1.3	Gprc6a	0.132276
Cep192	0.35593	Shisa4	1.76824	Usp45	0.181307	Pard3bos1	1.3	Herc1	0.13223
Cdk5rap2	0.355613	Adhfe1	1.76752	Ocrl	0.181305	1700003F12Rik	1.3	Dcun1d4	0.132227
Atp5o	0.355582	Fbxo15	1.7667	Epha7	0.181098	Wnt10a	1.3	Polr2h	0.13214
Tmem212	0.355465	Igsf10	1.76663	Krt222	0.181008	Adam1b	1.3	Rpl41	0.132137
Rplp1	0.355353	Kcnk7	1.76631	Slc30a4	0.180926	Cux1	1.3	Trim24	0.132111
Oasl1	0.35531	S100b	1.76631	Serpina3n	0.180861	Htr1a	1.3	Zfp92	0.132001
Rexo2	0.355067	Tubb4b	1.76606	Napepld	0.180546	Klra12	1.3	Rpl15	0.131873
Rhobtb1	0.354442	Slc1a3	1.76592	Far1	0.180492	1700048F04Rik	1.3	Ada	0.131702
Rps28	0.35435	2410137M14Rik	1.76592	Rnf128	0.180399	Onecut2	1.3	1110008L16Rik	0.131621
Adck3	0.353992	Cyp2ab1	1.76592	Gm42595	0.180288	Rinl	1.3	Prkacb	0.131617
Hat1	0.353887	Gm20449	1.76592	Fam169a	0.180218	Npffr2	1.3	Lancl3	0.131577
Reep4	0.353536	5330426P16Rik	1.7645	Chmp4c	0.180172	Slc6a18	1.3	Snhg4	0.131575
Lag3	0.35336	Gm9844	1.76177	Gm49359	0.180143	Frem1	1.3	Hsd17b11	0.131526
Avpr1b	0.352969	Spnb1	1.75779	Herc4	0.180133	Cenpk	1.29	Ncapd2	0.131485
Tbc1d8	0.352937	Fgfr1op	1.75594	Tmem255a	0.180061	Grin3a	1.29	Armcx5	0.13144
Pdgfc	0.35283	4930572J05Rik	1.75581	Gm7962	0.179915	Spon1	1.29	Chic1	0.131421
Gabarap	0.352554	Ruvbl2	1.7555	Pwwp3b	0.179768	Fbxw13	1.29	Pkdcc	0.13138
Tex15	0.352447	Src	1.75323	Eya1	0.179704	Stpg1	1.29	AI429214	0.131342
Ptrh1	0.351971	5031410I06Rik	1.75218	Pdk3	0.179561	5930412G12Rik	1.29	Ccl27a	0.131312
Pik3r5	0.351941	Tek	1.75218	Tmx1	0.179525	4921523L03Rik	1.29	Tgm4	0.131305
1600023N17Rik	0.351641	5830462I19Rik	1.7518	Ireb2	0.1795	5930427J20Rik	1.29	Rttn	0.131297
B230120H23Rik	0.351528	Ephb3	1.75177	Ergic2	0.179472	Krt33a	1.29	Slc25a10	0.131223
Fgl2	0.351464	Ptger2	1.75139	Hspa4l	0.179228	Gm35216	1.29	Blm	0.131171
Was	0.351311	Capn11	1.75099	Nxpe3	0.179117	Mrpl33	1.29	Ssh1	0.131152
Samd12	0.35117	Mab21l2	1.75099	Gbp3	0.179085	LOC102640586	1.29	Reep3	0.131033
Slc25a10	0.35096	P2rx5	1.74882	AW046200	0.178954	C730027H18Rik	1.29	Rps6ka3	0.130988
Darc	0.350795	Frat2	1.74774	Prr5l	0.178814	3300002A11Rik	1.29	Prickle3	0.130961
4732471J01Rik	0.350595	Nucks1	1.74613	Cers6	0.178731	Pllp	1.29	A330050F15Rik	0.130927
Pigh	0.350557	1700026L06Rik	1.74601	Epb41l4aos	0.178691	1810015A16Rik	1.29	1700021C14Rik	0.130912
Rnf141	0.350552	4921515J06Rik	1.74338	Cdkn2c	0.178665	Cacng3	1.28	Mgll	0.130853
B3gnt8	0.350279	Adam21	1.73882	Gm8995	0.178403	1700023H06Rik	1.28	Rnf217	0.130761
Mdh1	0.350076	Fam167b	1.738	Itgb2	0.178379	Sema3e	1.28	D18Ertd653e	0.130757
Dsc2	0.349938	1110017F19Rik	1.73724	Satb1	0.178211	Krt20	1.28	Mettl10	0.130723
Pigl	0.34992	Tnfrsf18	1.73127	Cdh13	0.177935	Sohlh1	1.28	Phf15	0.130689
Gcdh	0.349576	Taf5	1.73029	Narf	0.177784	4933437I04Rik	1.28	Romo1	0.130677
Ly6e	0.3491	Kcnt1	1.72678	Lgi2	0.177777	Adamdec1	1.28	Hadhb	0.130665
Tnfrsf23	0.349036	Gpha2	1.7262	Glod5	0.177716	AU022526	1.28	Lpar2	0.130664
Gnptg	0.348818	Amelx	1.72591	Rhebl1	0.177708	Crlf1	1.28	Txnrd2	0.130646
Mrpl23	0.348484	Itprip	1.72506	Efhc1	0.177679	Tlr12	1.28	Gm5480	0.13057
Stk17b	0.348168	1700052N19Rik	1.72482	Hectd2	0.177656	Dtd2	1.28	Fbxo36	0.130559
Dnajc3	0.347986	Poc5	1.72324	Gprasp1	0.177589	Gm12992	1.28	Fus	0.130512
Il2rg	0.347767	Cd55	1.72258	Purg	0.177438	4932432N04Rik	1.28	Tmem56	0.130376
Cfi	0.347722	Ift80	1.72207	Galnt15	0.177395	Art5	1.28	Tlk1	0.130296
Spaca1	0.347492	Ran	1.72083	Gm40438	0.177373	Gm16233	1.28	Zfp316	0.130223
Nme6	0.347475	Mbd4	1.71944	Hps4	0.177294	1700102J08Rik	1.28	Rara	0.130144
Edem1	0.347163	Hydin	1.7193	Zfp950	0.177264	AA589418	1.28	Ogfr	0.130127
Cdh13	0.346895	Mei4	1.71734	Gm47870	0.176964	Lef1	1.28	Ercc8	0.130105
Awat2	0.346773	Zdhhc15	1.71478	Cmc1	0.176922	4930533L02Rik	1.28	Siah1b	0.130067
4930578M01Rik	0.346766	6530409C15Rik	1.71358	Odr4	0.176872	Cpxm2	1.27	Rmnd5a	0.129936
Bola3	0.346663	Stard9	1.7095	Cd59b	0.176717	Grik3	1.27	Ccdc15	0.1299
C430049B03Rik	0.346086	Kctd17	1.70827	Ppp3cc	0.176688	Spc24	1.27	Rsrc1	0.129858
Ccdc111	0.345822	Chrdl1	1.70636	Bard1	0.176543	Fndc5	1.27	Mtmr12	0.129853
Edf1	0.345683	Fam40b	1.7059	Neb	0.176329	Tnks	1.27	2810055F11Rik	0.129846
Ly9	0.345467	Kirrel	1.70487	Trpm1	0.176284	Has2	1.27	Poc1b	0.129775
Lman2l	0.345294	Cdan1	1.70483	Ttc19	0.176266	Veph1	1.27	Elmo1	0.129757
D17Wsu104e	0.344433	Rb1	1.70422	Fam122b	0.176121	Csmd2os	1.27	2310042D19Rik	0.129644
Zfp286	0.344146	Sgcd	1.70338	Nphp3	0.176113	9430053O09Rik	1.27	Snx18	0.129614
BC051226	0.34402	Pdss1	1.70204	Gm44997	0.175995	Tmem82	1.27	B3galt4	0.129488
4933404O12Rik	0.343502	Eif4ebp2	1.70091	Plcxd3	0.175977	4921511C10Rik	1.27	Col4a3bp	0.129429
Crlf2	0.343418	Apip	1.69944	Cnot6l	0.175949	Gm11651	1.27	Fbxo21	0.129371
Zdhhc14	0.343293	Egfl8	1.69943	Tmed5	0.175923	Cldn1	1.26	Arhgef11	0.129354
Dcdc2a	0.343266	Sepw1	1.69501	Wnk3	0.175899	2810417H13Rik	1.26	Efhc2	0.129085
Cox6b1	0.343239	Wdr17	1.69348	Noxred1	0.175828	Nusap1	1.26	Nup214	0.128969
Cacna1g	0.342609	Cc2d2a	1.6933	Cdc42ep2	0.175712	Pigb	1.26	Tc2n	0.128857
2610524H06Rik	0.342593	Ntrk3	1.69302	Gm17771	0.175608	9230112D13Rik	1.26	Pik3r2	0.12884
Cnga3	0.342561	Tmem106c	1.69146	Gm46123	0.175587	1700058M13Rik	1.26	Fam194a	0.128836
Arhgef3	0.342336	Rnf26	1.69072	Far2	0.175565	Htra1	1.26	Kctd21	0.128787
4930511M06Rik	0.342176	Ly6h	1.69026	Tex14	0.175164	Nlrp5	1.26	2610002J02Rik	0.128771
Cbr2	0.342159	Cdh26	1.68741	Plekhh2	0.175088	Alx3	1.26	Rpp30	0.128495
Cox7b	0.341943	Acot3	1.68707	6330411D24Rik	0.17495	Krtap5-5	1.26	Ctps2	0.128487
Sh3bp2	0.341544	Clic6	1.68707	Gla	0.174893	Ceacam12	1.26	Fam108c	0.128455
Spcs1	0.341497	Nckap1l	1.68707	Dck	0.174868	Opn1sw	1.26	Prc1	0.128444
Ndufb7	0.341168	Nr1i2	1.68452	Gdap1	0.174809	Bbox1	1.26	Fgl2	0.128441
Ubr4	0.340969	Gckr	1.68441	Hapln1	0.1746	Lca5l	1.26	Sbf2	0.128412
Tceb2	0.340899	Nat1	1.68415	Trim12a	0.174419	4930519D14Rik	1.26	Setd7	0.128353
Grn	0.340849	Gm8186	1.68392	Ifnar2	0.1744	Mroh9	1.26	Adamts6	0.127894
Timm8b	0.340765	Gng3	1.68129	Ctss	0.174298	Psg-ps1	1.26	Nckap5	0.127879
Xylt1	0.340745	Sema7a	1.68071	Gpc6	0.174255	Npc1l1	1.26	Fbxl20	0.127844
Nudt8	0.340513	Ninl	1.68058	Gm4118	0.174178	4833417J16Rik	1.26	Leprel1	0.127761
Tdp1	0.340448	Pa2g4	1.67955	Gm45218	0.174143	Myl10	1.26	Rimklb	0.12775
Acot13	0.340369	Hmgn5	1.67887	Blm	0.173623	6430710C18Rik	1.26	Kcnj6	0.127707
Pex10	0.340344	Adnp	1.67856	Aph1b	0.173526	Ckap2l	1.25	Dll4	0.127648
Usmg5	0.339682	Scrib	1.67671	Gm16835	0.173452	A930003A15Rik	1.25	Agbl3	0.127617
Tollip	0.339627	Gm6594	1.67668	Slc4a7	0.173123	Atoh8	1.25	Rpl23	0.12749
Snord96a	0.339529	Col9a3	1.67636	Zdhhc20	0.173107	Cst11	1.25	Bub1	0.127441
Smap2	0.33915	Mgp	1.67356	Mitf	0.17309	Chrnb2	1.25	Sun2	0.127217
Tlr13	0.338837	Donson	1.66963	H2bc6	0.173004	Gas7	1.25	Acsl1	0.12699
Slc28a2	0.338702	Ehf	1.66755	Adamts7	0.172981	Ptprcap	1.25	Eny2	0.126981
Tubb5	0.33865	Gm5475	1.66686	Tube1	0.172804	D17Ertd165e	1.25	Tmem163	0.126979
Ogfrl1	0.338488	Amot	1.66534	Sorbs2	0.172728	Gpr18	1.25	Snai1	0.126954
Anapc16	0.338279	Obfc1	1.66258	Ufsp2	0.172714	4930566N20Rik	1.25	Myo1b	0.126774
Pmaip1	0.33824	Tubd1	1.6589	Jade3	0.17262	Ascl1	1.25	Ccdc57	0.126734
5530401A14Rik	0.337998	Kit	1.65216	Snapc3	0.172561	Slc6a4	1.25	Gabrb3	0.126685
Dusp15	0.337316	Myh10	1.65094	Gm40557	0.172551	Gm7694	1.25	Irgm2	0.126644
9030624G23Rik	0.337297	Sdc1	1.64865	R74862	0.172529	Bmp8a	1.25	Parp14	0.126503
Cln5	0.336877	Hpdl	1.64777	Nrip3	0.172355	Atf7ip2	1.25	Dync1i1	0.12641
B3gat2	0.336405	Hoxb2	1.6447	Fbxl13	0.172186	9330169L03Rik	1.25	Lgi1	0.126403
Gm15545	0.336284	Vsig2	1.64272	Piga	0.172182	Znrf2	1.24	Accn1	0.126402
Havcr2	0.335631	Nacc1	1.64123	Zfp521	0.17208	Tspan14	1.24	Ctsf	0.12635
Slco3a1	0.335555	Lin37	1.63997	Efcab11	0.171796	Lgals12	1.24	9330020H09Rik	0.126336
C5ar1	0.335379	Gfra2	1.63982	Tcf19	0.171524	4921525O09Rik	1.24	Mansc1	0.126335
Abracl	0.335219	Ucn2	1.63982	Pigr	0.171332	Plekhh2	1.24	Depdc7	0.126326
Unc13a	0.335099	Frmd8	1.63884	1810019N24Rik	0.171309	Msc	1.24	Plekha7	0.126214
Plcb2	0.334815	Phka2	1.63739	H2-Q7	0.171263	Anapc1	1.24	Mll5	0.126116
Sel1l3	0.334693	Shf	1.6326	Carns1	0.17089	Gm4022	1.24	Ece1	0.126093
Cuta	0.334542	Evl	1.63149	Dmxl2	0.170649	4930486L24Rik	1.24	Cxxc4	0.126092
B3galt2	0.33454	Atcay	1.63142	Apbb1ip	0.170602	St6galnac1	1.24	Adam22	0.126077
2810428I15Rik	0.334248	1700019A02Rik	1.62981	Spred3	0.170576	Gpha2	1.24	Cacna1c	0.126046
Rnpep	0.333818	Usp13	1.62859	AC154200.1	0.170552	Gm15527	1.24	Serpinb9	0.125985
Plcg2	0.333545	Fxyd6	1.62832	Klhl24	0.170476	A730035I17Rik	1.24	Mettl15	0.125968
Cenpq	0.333516	Rnaseh2a	1.62745	Gm45001	0.170471	Olfr16	1.24	Ccdc148	0.125946
Fstl4	0.333434	Msh4	1.62653	Zfp971	0.170428	Slc1a2	1.24	Bcl2l1	0.125842
Bola2	0.333078	Chi3l7	1.62624	Exd1	0.170389	4930518C04Rik	1.24	Pphln1	0.125711
Pabpc1	0.332874	Whsc1	1.62278	Dclre1b	0.170363	Diexf	1.24	Sdpr	0.125685
Lmnb1	0.33263	Tcea3	1.62147	Ssh2	0.170353	C920008N22Rik	1.24	Bcl9	0.125657
Elovl7	0.332605	Smc1b	1.62132	Uty	0.1702	Rrm2	1.23	6330549D23Rik	0.12564
Galnt9	0.332346	Acmsd	1.61975	Hck	0.170067	B3galnt1	1.23	Ttc25	0.125603
Vac14	0.332137	Syt12	1.61906	Wrn	0.170037	Tcf19	1.23	Sult2b1	0.125539
Isg15	0.331881	Rdm1	1.61858	3830408C21Rik	0.169897	Ccna2	1.23	Ksr1	0.125512
Tmem139	0.331851	B230120H23Rik	1.61643	Gm4895	0.16977	Cth	1.23	Lrrn4cl	0.125496
Clec12b	0.331401	Triobp	1.61625	Atp5l	0.169657	Ccdc89	1.23	Vil1	0.125496
Card9	0.331399	Slx4	1.61355	Cetn4	0.169606	Rrp9	1.23	Tjp1	0.125487
Ces2g	0.331134	Lsm5	1.61314	Aff2	0.169394	AU014756	1.23	Cpt2	0.125233
Shmt2	0.33094	2810025M15Rik	1.61242	Slc25a53	0.169266	Grik2	1.23	Myt1	0.125206
Ttc13	0.330563	Prrg4	1.61218	Ndufc2	0.169161	Cyp17a1	1.23	Hook2	0.125084
Slc38a1	0.330399	Alg14	1.61097	Il1r2	0.169057	1700003H04Rik	1.23	Bahcc1	0.125067
Tfap4	0.330041	Tslp	1.60978	Cmas	0.168782	Zfp101	1.23	Fahd2a	0.124811
Xpo1	0.329919	Gls2	1.60643	Ankhd1	0.168766	Ccdc106	1.23	Exoc6	0.12478
Oxtr	0.329735	Dazl	1.60129	Adamts9	0.168662	Dusp9	1.23	Plch1	0.12475
Gm16702	0.329675	Mdk	1.59763	Usp40	0.168661	Mybpc2	1.23	D830031N03Rik	0.124722
Gprin2	0.329505	2610528J11Rik	1.59748	Dock4	0.16841	4930487N04Rik	1.23	Rcan3	0.124602
Wdr67	0.329385	Gnrh1	1.59612	Efcab2	0.168326	Gm26911	1.23	Filip1	0.124588
Bst2	0.329232	Cyp2t4	1.59596	Rpl9-ps6	0.168302	Lyrm1	1.23	Ncapg2	0.124578
Sstr3	0.329101	Paox	1.5952	Rock1	0.168278	Lcn9	1.23	AA388235	0.124556
Cxcr4	0.329022	Rbm42	1.59518	Tcea1-ps1	0.168247	Tspan11	1.23	Klhl3	0.124508
Zfp92	0.328881	Phlda3	1.59496	Ttc39b	0.168181	4930537H20Rik	1.23	Svil	0.124468
Ndufc1	0.328831	Kdm4d	1.59388	Dusp11	0.167973	Mthfr	1.23	Macrod1	0.124357
Cox5b	0.328783	Hvcn1	1.59254	Mcts1	0.167772	Sfi1	1.23	Dgat2	0.12435
Ell2	0.32837	Gpr150	1.59164	Gm37339	0.167615	D6Ertd474e	1.23	Dtnbp1	0.124319
Sf3b5	0.328352	Mfng	1.59132	Suz12	0.167424	Sval1	1.23	Tlr3	0.124214
Guk1	0.327851	Ankrd9	1.59098	Gm40394	0.167379	Gas2	1.22	Utp3	0.124105
Rps27l	0.326839	Ccdc96	1.59077	Gbp7	0.167327	Pycr1	1.22	Nit2	0.123961
1810034E14Rik	0.326778	Hoxb4	1.58975	Lrrc29	0.167093	Ska1	1.22	Ppap2c	0.123914
Fas	0.326719	Cpsf4	1.58937	Btk	0.167005	Rnase6	1.22	Acsf3	0.123913
D8Ertd82e	0.326482	Wdr96	1.58877	Ica1l	0.16695	Naa40	1.22	Glg1	0.123855
Cd300e	0.32632	Rgs5	1.58801	Gm50454	0.166831	Plxnb3	1.22	Rps4x	0.123739
Uap1l1	0.326303	1500001M20Rik	1.58659	Gm5578	0.166787	Upk1b	1.22	Ripk1	0.123699
Car4	0.325538	Stx1b	1.58637	Cd34	0.16677	Defb6	1.22	Fam164c	0.123688
Itga4	0.324194	Cfl1	1.58281	Bbx	0.16673	1700116B05Rik	1.22	Odz4	0.123668
Dnajb11	0.324119	Slc4a8	1.58267	Fam126b	0.166722	C130071C03Rik	1.22	Ptpru	0.123667
Slc28a3	0.324085	Sdk1	1.58124	Slc7a14	0.166641	1700025H01Rik	1.22	Ppa2	0.123642
Hoxb7	0.323968	Fa2h	1.58094	Rdh14	0.16661	3110039C02Rik	1.22	Abhd15	0.12363
Pecr	0.323697	Pde11a	1.58059	Nme5	0.166609	Hyls1	1.22	Dusp7	0.123552
Fabp4	0.323526	Mad2l1bp	1.57917	Hsf2	0.166408	Zfpm2	1.22	Hdac11	0.123536
Erp44	0.323373	Adamts16	1.57722	Ap1s2	0.166355	Tktl2	1.22	Fam40b	0.123501
Fdx1l	0.323064	Rpl3l	1.57722	C030029H02Rik	0.166234	B230114P17Rik	1.22	Rbbp8	0.123363
2900041M22Rik	0.322649	Efcab4b	1.57685	Senp5	0.166157	Cd200r4	1.22	Smarcc2	0.123348
Lrp5	0.322462	Rs1	1.57685	Rasa1	0.166147	Ptdss1	1.21	Tmem186	0.123223
Plp2	0.322289	Ccl17	1.57592	Paqr4	0.166088	BC028471	1.21	Capsl	0.123191
Rfx6	0.322084	Ston2	1.5719	Lmbrd2	0.166071	4933415b22rik	1.21	Stk35	0.123135
Jmjd8	0.321529	Ccdc89	1.57031	Arhgef15	0.165997	4930429F11Rik	1.21	Ptpn13	0.12312
Mapkapk3	0.321496	Mum1	1.57011	4833420G17Rik	0.165951	Draxin	1.21	Oxsm	0.123039
Lipt2	0.32053	Mrs2	1.56874	Khdrbs2	0.165915	2700089I24Rik	1.21	Mettl5	0.122994
E530011L22Rik	0.320434	Dars2	1.567	Tbc1d8b	0.16585	Tlr8	1.21	Marveld2	0.122815
Angptl1	0.320311	Atp11c	1.56554	Mblac2	0.165732	Odf4	1.21	Med12	0.12279
Bcat1	0.320178	Pmaip1	1.5639	Ccne2	0.165702	Gm884	1.21	Ankrd42	0.12278
Mb21d1	0.320052	Mamstr	1.56357	Sv2c	0.165557	Ikbkb	1.21	Gabarapl2	0.122755
Gm5086	0.31995	Prrc2a	1.56325	Adgrl3	0.165556	6430514K02Rik	1.21	Aox1	0.122735
Pcdhb14	0.319485	Gm11099	1.56296	Fam120c	0.165436	Tert	1.21	Myst3	0.12272
Prr5	0.319467	Snai3	1.56296	Prdx4	0.16522	Asb16	1.21	Klhl11	0.122656
Pcdhga10	0.319341	Trfr2	1.56296	Ranbp9	0.164928	Gm19395	1.21	Fzd4	0.122539
Gal3st1	0.319222	Rest	1.56277	Hdac1-ps	0.164922	Gm20269	1.21	Slc35c1	0.122458
Tmem140	0.319128	Sardh	1.56259	Xpo1	0.164816	2610020C07Rik	1.21	Tmem71	0.122453
Wfdc17	0.318968	Clcf1	1.56231	Guf1	0.1647	Gm36307	1.21	Plk5	0.122416
Clu	0.318587	Cct6b	1.55722	Rpgrip1l	0.164691	Gm22	1.21	Wdr35	0.122368
Fam3a	0.318389	Srd5a1	1.55633	Gm13327	0.164473	C80893	1.21	Fam155a	0.122355
Slfn1	0.31774	C330046G03Rik	1.55568	2310014F06Rik	0.164312	5430402M21Rik	1.21	Rasal1	0.122321
Dok5	0.317731	1600016N20Rik	1.55454	1700066M21Rik	0.164214	B230110C06Rik	1.21	Fam176b	0.122189
Hirip3	0.317729	Slc4a5	1.55352	Gm45844	0.164155	Adad1	1.21	Dnajc28	0.122107
Plod3	0.317689	Dbil5	1.55177	Ccdc82	0.16392	Chsy3	1.2	Gm11110	0.122085
Txn1	0.317675	Cd40	1.55174	Hsd17b12	0.163908	5830411J07Rik	1.2	Ifnar2	0.122082
Gm14005	0.317667	Rprm	1.55102	Rbm48	0.163878	Smyd1	1.2	Pacrg	0.122048
Pla2g2d	0.317417	Hey1	1.54991	Fktn	0.16373	Sptlc3	1.2	Stard5	0.122023
Atp6v0e2	0.317393	Cnih4	1.54862	AU020206	0.163691	Rad18	1.2	Rab11fip4	0.12176
Ms4a4b	0.317244	Plb1	1.54715	Rell1	0.163625	Dppa3	1.2	Cit	0.121724
Fhl5	0.316973	Fam89a	1.54702	Zfp941	0.163613	Lin28a	1.2	Tmem98	0.121602
Alk	0.316747	Hipk4	1.5443	Tmem184c	0.163569	Gdpd2	1.2	9930014A18Rik	0.121473
B3gnt3	0.316682	Sept10	1.54281	Marchf3	0.163506	6530413G14Rik	1.2	2010107H07Rik	0.121428
Anks6	0.316465	Parp2	1.54183	Chrna1os	0.163388	Mpl	1.2	Map4k5	0.12142
Xlr	0.31635	4921513D11Rik	1.54124	Slc28a2	0.163251	Map3k7	1.2	Grb14	0.1214
Lpin1	0.315874	Slc7a9	1.5404	Asf1b	0.163077	Mmp9	1.2	Abcb1b	0.121387
Agbl2	0.315858	Rpp30	1.54013	Casc4	0.163061	Ap5m1	1.2	Sass6	0.121134
Slc25a43	0.315765	Ddx39	1.53837	Gm49067	0.162986	Gm10461	1.2	Eif4b	0.121104
1600002H07Rik	0.315586	Swap70	1.53754	Apoo	0.162956	Olfr67	1.2	Nr1d1	0.121081
Taf10	0.315371	Anp32b	1.53715	Zdbf2	0.162922	Ldhc	1.2	Pvrl4	0.121002
Hist1h4i	0.315034	Tssk4	1.53671	Fzd3	0.162864	1700045I11Rik	1.2	Bai3	0.120975
Skp2	0.314776	Mmp16	1.53601	Gm49768	0.162843	4930442P07Rik	1.2	Fhl4	0.120884
Naglu	0.31475	Mbd6	1.53445	Sos1	0.162788	A230107O07Rik	1.2	Ccdc117	0.120859
Zfp521	0.314503	Mns1	1.53351	Klf12	0.162703	Grip1os1	1.2	1700019E19Rik	0.120851
Col6a3	0.31439	1700029F09Rik	1.53161	Mnd1	0.16267	4930579P08Rik	1.2	Ripk2	0.120808
Nat1	0.314201	Slc26a5	1.52923	Wfdc17	0.162589	BB211804	1.2	2310010J17Rik	0.120789
Zfp57	0.314004	Snrpg	1.52708	Pdf	0.162545	4930524N10Rik	1.2	2700049A03Rik	0.120772
Rnf186	0.313944	Plch1	1.52705	Stau2	0.162544	4933424M12Rik	1.2	Fam183b	0.120714
Eng	0.313812	2310006M14Rik	1.52616	Elmo1	0.16252	Abca13	1.2	4930505A04Rik	0.120666
St7	0.313696	Eif1ad	1.52454	Nktr	0.162476	Gm26688	1.2	Slfn9	0.120618
Fap	0.313631	Tmem178	1.52376	Gm20008	0.162347	Prlr	1.19	Athl1	0.120534
4632427E13Rik	0.313419	Gpc1	1.52313	Rab39b	0.162338	Bhlha15	1.19	H2-DMb1	0.120529
Trappc9	0.313303	Pold3	1.523	Erfe	0.162195	Gna14	1.19	Ppapdc3	0.120511
Dapp1	0.313103	Impg2	1.52298	Tmem65	0.162104	Clspn	1.19	Slain1	0.120511
Sirpa	0.312725	Tnfrsf10b	1.52256	Spata45	0.162004	1110004M10Rik	1.19	Apitd1	0.1205
Rgma	0.312679	9230109A22Rik	1.52192	Slc25a37	0.161938	Kdm2a	1.19	Gm14872	0.120483
Ccdc107	0.312616	Gm12666	1.52085	C130046K22Rik	0.161776	Psapl1	1.19	Apex2	0.120477
Amica1	0.312401	Tmem209	1.5195	Dzip3	0.161659	Krt19	1.19	Stxbp6	0.120342
Pacrg	0.312053	Nrg1	1.51878	Tcf7l2	0.161617	Fscn3	1.19	Inpp4b	0.120318
Rab3d	0.311746	Gpm6b	1.51877	Tbc1d4	0.161616	Nectin1	1.19	Plekhg6	0.120262
Rhoh	0.311563	Med30	1.51868	Fam228b	0.161511	Lama4	1.19	Dennd1a	0.120259
Hcn1	0.31147	Ddb2	1.51738	Gprc6a	0.161373	Dcpp1	1.19	Chic2	0.120258
Hcls1	0.311452	Nphs2	1.51495	Tmem117	0.161276	Tchhl1	1.19	Cdc14b	0.120236
Raph1	0.311126	4933428G20Rik	1.51469	Nalcn	0.161176	Rspo3	1.19	Pkp4	0.120194
Stpg1	0.311061	Scarf2	1.51372	Ghr	0.161151	2010111I01Rik	1.19	Cyb5r3	0.120176
Tnfrsf22	0.31094	Krt27	1.51225	Emid1	0.161021	6330436F06Rik	1.19	Dmd	0.12013
Mpst	0.310894	Rgs10	1.5121	Il6	0.160962	Ajap1	1.19	Kcnb1	0.120114
Adamts8	0.310846	Pygm	1.51192	Cep76	0.16096	Asb12	1.19	Ocrl	0.12005
Kcnk13	0.310808	Lilrb3	1.51178	Nxph1	0.160949	C79356	1.19	Rrm2b	0.119789
Ndufaf2	0.310723	Vcan	1.51041	Erp44	0.16091	Inhbe	1.19	Dbpht2	0.119736
Rtp4	0.309498	Dgkz	1.50851	Astn2	0.1609	Myo3b	1.19	Erg	0.119668
Tmem101	0.309449	Plscr2	1.50817	Tmem29	0.160853	Rnf180	1.18	Golim4	0.119592
Esrp2	0.309312	Ifitm1	1.50798	2700049A03Rik	0.160836	Ttpal	1.18	Trmt11	0.119496
Arhgef16	0.309252	Lrit2	1.50732	Ago3	0.160794	Angptl2	1.18	4930402H24Rik	0.119408
Tmem238	0.309155	Adcy3	1.50707	Mdh1b	0.160767	Crx	1.18	Setd8	0.119314
Abi3	0.308808	Ccdc114	1.50613	Osgin2	0.160721	Atg2b	1.18	Ephb6	0.119241
Irak3	0.308762	BC049762	1.50612	Fut4	0.16071	Adat1	1.18	St5	0.11923
Alpl	0.308759	Gm10923	1.50485	Gm9887	0.160692	1700031F05Rik	1.18	Asah2	0.119113
Tmem184c	0.30875	BC061194	1.50473	Ms4a4a	0.160658	Slc6a14	1.18	Kcnk16	0.118907
Kcnma1	0.308669	Extl1	1.50473	Fam102b	0.160642	5330403D14Rik	1.18	Supt3h	0.118861
Gm16576	0.308228	1700066M21Rik	1.50096	Gm12474	0.160555	Efl1	1.18	Ccdc12	0.118837
Ndufb8	0.30819	Smad3	1.49908	Zfp605	0.160505	Hoxa10	1.18	1520402A15Rik	0.118742
Pex11a	0.30793	Gabra1	1.49725	Slc24a2	0.160419	4930533K18Rik	1.18	Ubxn2b	0.118683
Bak1	0.307868	Sh2d7	1.49725	Ice2	0.160411	Met	1.18	4930534B04Rik	0.118668
Ern1	0.30777	Tmigd1	1.49656	Casq2	0.160362	Flnc	1.18	Wdyhv1	0.118667
Muc4	0.307724	Itgb4	1.49627	Mtmr10	0.160313	Ces1h	1.18	Elf3	0.118663
Dnmt1	0.307517	Egr3	1.49607	Gsap	0.160225	9430037G07Rik	1.18	Fam19a1	0.118647
Adam32	0.307422	Gpsm3	1.49607	Tenm3	0.160172	Slc6a16	1.18	Zfp82	0.118439
Coa4	0.30739	Lpo	1.49607	Nab1	0.160154	Fcer1a	1.18	Dock7	0.118421
Banf1	0.307027	Scara3	1.49488	Isl1	0.160137	Lif	1.18	Ube2e2	0.118247
Itgb6	0.306764	1110032F04Rik	1.49445	Zfp383	0.160129	Pmf1	1.18	Kpna6	0.118193
Exoc4	0.306676	Pcolce2	1.49273	Gm20939	0.160058	Rab33a	1.17	Tpd52l1	0.118109
Rasgrp4	0.306522	Lca5	1.49222	Nhsl2	0.160023	Rbm20	1.17	Ank2	0.118093
1110008P14Rik	0.306285	Trim34b	1.48835	Wdhd1	0.159864	Slco1a5	1.17	A930019D19Rik	0.11801
B9d1	0.306067	Spata4	1.4882	Serinc1	0.159735	Fen1	1.17	Car8	0.117876
Igf2r	0.306001	Atn1	1.48803	Fyco1	0.159725	S100g	1.17	Chrm3	0.117806
4930550C14Rik	0.305853	Cyp26b1	1.48684	Atxn7l1	0.159715	8430426J06Rik	1.17	Skap2	0.117789
2010107G12Rik	0.305717	Atr	1.48666	Gm9118	0.159479	C530025M09Rik	1.17	Cdh9	0.11773
Nlrp3	0.305502	Wdr27	1.48555	C6	0.159468	Hoxa3	1.17	Agl	0.117727
Rnf112	0.305439	Tmem129	1.48509	Polq	0.159379	Fpr-rs4	1.17	Tulp4	0.117724
Gfpt2	0.305006	Enpp3	1.484	Bdnf	0.159275	Plxdc1	1.17	Arhgap11a	0.117721
Gpt2	0.304777	Klhl3	1.48065	Syk	0.159166	Tex19.2	1.17	St3gal1	0.117682
Ormdl2	0.304763	Ddx20	1.48024	Dapp1	0.159143	4930420G21Rik	1.17	Art3	0.117634
Abcg4	0.304698	Rad21	1.48001	Gng2	0.158982	Zfpm1	1.17	Slitrk6	0.117627
Degs1	0.304365	Tdp1	1.47961	Plau	0.158957	Gm10804	1.17	D930015M05Rik	0.117592
1110054M08Rik	0.304336	Cyr61	1.4796	Bmp2k	0.158952	Cers3	1.17	Zbtb39	0.117575
Zscan2	0.30397	Setd8	1.47843	Cxxc4	0.15892	Scube2	1.17	Furin	0.117566
Nek6	0.303761	Plekhg2	1.47835	Fgf12	0.15892	Sulf1	1.17	Rpl38	0.117294
Gm6981	0.303585	Dtx4	1.47745	Ids	0.15886	8430422H06Rik	1.17	Eef1a1	0.117269
Itm2c	0.3032	Usp21	1.47703	Fam221b	0.158666	2310065F04Rik	1.17	Ccbe1	0.117187
Evi2b	0.302741	Ddit4l	1.47679	Ints8	0.158528	Adamts19	1.17	Stradb	0.117155
Mrps21	0.301952	Hunk	1.4766	Tmtc3	0.158498	Ccr4	1.17	Trim25	0.117078
Rsph1	0.301741	Anapc11	1.47657	Polr2k	0.15849	Spam1	1.17	Dennd4a	0.116982
Slc46a1	0.301258	Fn1	1.47557	4930592A05Rik	0.158368	Klrb1a	1.17	Ak3	0.116892
Myo3a	0.301243	Slc16a1	1.47521	Ascl4	0.158356	4930405H06Rik	1.17	Kcne4	0.116767
Slc39a10	0.300907	Loxl4	1.47483	Hmox2	0.158263	Cks1b	1.16	D930015E06Rik	0.116737
Diras2	0.300568	2600006K01Rik	1.47469	Pfkfb1	0.158194	Plk1	1.16	6030458C11Rik	0.116719
Btbd11	0.300539	Lbr	1.47364	Tiparp	0.158177	Gfra3	1.16	8030462N17Rik	0.116711
Nck2	0.300475	Tagln2	1.47324	Nfam1	0.158156	Cenph	1.16	Znf512b	0.116637
Hrct1	0.300365	Spire2	1.47262	Gm15518	0.158082	Zdhhc22	1.16	Fam190a	0.116482
Apobec3	0.300352	Tmem186	1.47171	Rbm41	0.158067	Sept1	1.16	Inpp5k	0.116408
Wfdc2	0.300324	C230081A13Rik	1.46949	Gm29054	0.15804	4930473M17Rik	1.16	St6galnac5	0.116339
Dis3l	0.300165	E2f1	1.46913	Ap1s3	0.157986	Tradd	1.16	Cep192	0.116339
Fut1	0.300091	Rnf126	1.46898	Pkd1l1	0.157944	Enpp6	1.16	1700086L19Rik	0.116327
Paox	0.300039	Csrp1	1.46838	Fgd6	0.157879	1700028P14Rik	1.16	Arih2	0.116318
Cd53	0.299727	Cdkn2aipnl	1.46832	Hsp90b1	0.157855	Arsg	1.16	Slc6a8	0.116311
Atp5g2	0.299408	Ankrd52	1.46691	Fbxo8	0.157849	2900060K15Rik	1.16	Cpne3	0.116295
Tlr6	0.299354	Arhgap27	1.46161	Prdm5	0.157738	Stac3	1.16	Tfe3	0.116261
Tuba8	0.29927	Larp7	1.46076	Nxpe4	0.157681	Tlr1	1.16	Plxnb2	0.116196
Cldn3	0.299254	Dynlrb2	1.45996	Dynlt1-ps1	0.157679	Csf1	1.16	Jmjd6	0.116135
Epb4.1l4a	0.299165	Zik1	1.45942	Gm26559	0.157556	4930569F06Rik	1.16	Pamr1	0.116056
Cdk14	0.299164	Npl	1.45842	Ube2g1	0.157487	Musk	1.16	Myo6	0.116025
Fam83g	0.298741	Penk	1.457	Scai	0.157471	Cfap70	1.16	Shroom3	0.115979
Atp6ap1	0.298608	Ccdc57	1.45676	Sowaha	0.157382	Stfa2l1	1.16	Socs3	0.115876
Muc1	0.298391	Abcc9	1.45644	Xk	0.157282	Gm128	1.16	Zmat2	0.115833
Slc1a4	0.297981	Nup160	1.45618	Ptpn4	0.157156	Tnk1	1.16	Rhbdd1	0.115748
Artn	0.297413	Slc35f2	1.45588	Nfat5	0.157082	D5Ertd159e	1.16	Gramd4	0.115502
Bai2	0.297372	Ppil1	1.45583	Dnm3	0.157034	Palld	1.15	Ctso	0.115403
Rasl10b	0.297223	Sf3a2	1.45527	Chgb	0.156952	Pstpip2	1.15	Jmjd1c	0.115376
Hif3a	0.297214	2900006K08Rik	1.45498	Kcnh5	0.156943	4922502D21Rik	1.15	Actl6b	0.115084
Lage3	0.297159	Hcls1	1.45462	Vps41	0.156851	Kcnh3	1.15	1810010H24Rik	0.115052
Upb1	0.296729	Lrrc46	1.45415	Jmy	0.156819	Gja10	1.15	Irf9	0.114894
Dnajc15	0.296728	Masp1	1.45367	Pms2	0.156802	Tac1	1.15	Unc5c	0.114866
Lpcat3	0.296489	Ifi203	1.45328	4833418N02Rik	0.156795	Fbp2	1.15	Rabac1	0.114799
Mnd1	0.296304	Lcorl	1.45204	Osbpl6	0.156636	Igsf1	1.15	Trnau1ap	0.114769
Rtkn2	0.296271	Sap30	1.45134	Farp2	0.156522	Cyp2j11	1.15	Sim1	0.114724
Gm14634	0.296191	Slc12a5	1.45074	Zfp133-ps	0.156409	Dlx6os2	1.15	Syt13	0.114693
Ccdc69	0.295945	Zfp518b	1.45042	Ddias	0.156313	Adgrg2	1.15	Dact3	0.114592
Elovl4	0.295906	Sec14l3	1.45029	4632404H12Rik	0.156266	5430437J10Rik	1.15	B3galtl	0.114526
D630039A03Rik	0.295732	Smc1a	1.44971	Zfp970	0.156218	C87926	1.15	Ppl	0.114463
Eps8	0.295647	Nhej1	1.44967	Sesn3	0.156115	Dzip1	1.15	Exosc6	0.114329
Atp6v0e	0.295631	1700101E01Rik	1.44938	9530062K07Rik	0.156105	Tubb4b	1.15	Plekhb1	0.114328
Mob3b	0.295542	Ulk4	1.44878	Kntc1	0.156054	Rad51d	1.15	Serhl	0.114246
Ddit4	0.295251	Spef1	1.44707	Zfp759	0.156043	5033430J17Rik	1.15	Hnf4a	0.114152
Casp4	0.295171	Casp8ap2	1.44695	Agl	0.155888	Siglece	1.15	Grip1	0.114129
Atp5d	0.295089	Hist1h2aa	1.4443	Lrguk	0.155858	Stil	1.15	Gbp5	0.114113
Isoc2b	0.295045	Phldb1	1.44382	Gm6170	0.155541	Cyp4a12a	1.15	Srf	0.114082
Trib3	0.294775	Gm6741	1.44379	A730063M14Rik	0.155507	9130403I23Rik	1.15	Nbeal2	0.114041
Fras1	0.294671	Calca	1.44377	Sdhaf3	0.155424	Cyp1a2	1.15	Kirrel2	0.113989
Il27ra	0.294532	Dock3	1.44313	Smg1	0.155391	Tex21	1.15	AK010878	0.113875
Alcam	0.294377	Mrc1	1.4417	Gm16973	0.155335	A730089K16Rik	1.15	Inpp5e	0.113864
Fam175a	0.294141	Trim17	1.44146	Rpp40	0.155322	Rgs20	1.15	Tor1aip1	0.113829
Scly	0.293895	Zfp385b	1.44051	Serf1	0.155288	1300014J16Rik	1.15	L3mbtl2	0.113817
Slc50a1	0.293658	Cd69	1.43929	Fam13c	0.155183	Ovol2	1.14	Eya1	0.113779
Gnat2	0.293486	Olfr332	1.43929	Qdpr	0.155141	Dnmt3b	1.14	Arxes2	0.113765
Uba52	0.293398	Csmd1	1.4385	Ahsa2	0.155088	Gnb1l	1.14	Fam46c	0.113756
Try4	0.293329	Omg	1.4385	Ccnc	0.155009	Ipo7	1.14	Col6a6	0.113723
Pabpc4	0.293308	Mcts2	1.43755	Cd46	0.154986	AU019754	1.14	Btbd7	0.113708
Hist2h3c2	0.293137	5730522E02Rik	1.43477	Arfgef3	0.154918	Pid1	1.14	Scn9a	0.1137
Krt7	0.293034	Tmem2	1.43477	Gm13814	0.154869	Greb1l	1.14	Arc	0.113644
Gm11110	0.29293	Pik3cd	1.43361	C130021I20Rik	0.154858	Cyp21a1	1.14	Ctss	0.113578
Mrpl21	0.292863	Dbx2	1.43303	Cntn3	0.154817	A530079E22Rik	1.14	Cdk14	0.113571
Scpep1	0.292446	1500009L16Rik	1.43275	Ccng1	0.154712	Mfsd4a	1.14	Hsdl2	0.113456
Pappa	0.292342	Acsl5	1.43272	4933431E20Rik	0.154703	Sqrdl	1.14	Slc27a1	0.113442
Pla2g2f	0.292324	Srcrb4d	1.43168	2210408I21Rik	0.15464	Samd11	1.14	Dock10	0.113431
Tango2	0.292008	Pdik1l	1.43016	Zfp979	0.154624	C79452	1.14	Dcbld1	0.113376
Katnal2	0.291948	Gm3604	1.42984	Trpc1	0.154608	Nkain2	1.14	Gna13	0.113352
Ttc22	0.291583	Lrwd1	1.42951	Amer3	0.154596	Strn	1.14	Cpeb4	0.113182
Tspan15	0.291429	Dnaic2	1.42893	Kras	0.154539	Gpr27	1.14	Glb1l	0.113172
Ccsap	0.291423	Smc6	1.42816	Lcorl	0.154383	Hmga2	1.14	Sema3e	0.113161
Prlhr	0.291333	Pla2g4c	1.42663	Fnbp4	0.154355	3632454L22Rik	1.14	Mfap1b	0.11316
Slc35d3	0.291203	Bai2	1.42537	Eif3e	0.154198	Gcsh	1.13	Fhad1	0.113074
Cdh9	0.290997	Arhgef40	1.42486	Thoc2	0.154153	Cldn23	1.13	Apoo	0.112875
Gm5294	0.29074	Gabra3	1.42404	Gm44442	0.15403	Kif2c	1.13	Tox3	0.112868
Ctnnb1	0.290558	4931429L15Rik	1.42397	Tlcd4	0.153914	4930486A15Rik	1.13	Proc	0.112851
Atp5b	0.290003	Gm9742	1.42397	Cbx5	0.153901	Mkln1os	1.13	0610011F06Rik	0.11283
Scd3	0.289231	Serhl	1.42323	Gm48069	0.153886	Chrna9	1.13	Mnat1	0.112743
Immp2l	0.289218	Scn2a1	1.42308	Pnpla8	0.153838	Gata4	1.13	Siah1a	0.112601
Siva1	0.289142	Rab15	1.42297	Pole2	0.153805	Synm	1.13	Ccdc88a	0.112574
Man1a	0.289133	Lsm11	1.42243	Gm20036	0.153691	Lag3	1.13	Tarbp2	0.112557
Ndufa13	0.288953	2700029M09Rik	1.42208	Aldh1l2	0.153676	Gm16499	1.13	Fut1	0.112499
P4ha1	0.288483	Zfp957	1.42201	Slc38a4	0.153661	Tbc1d10c	1.13	Tesk1	0.112418
H2afz	0.288141	Cyth2	1.42099	Zfand4	0.153613	C030013G03Rik	1.13	Pde4c	0.112284
Nans	0.287905	Prdm10	1.42094	F8	0.153557	D9Ertd26e	1.13	Exoc4	0.11224
Cd82	0.287898	Zbtb45	1.42071	Clock	0.153481	4930563N14Rik	1.13	Sdr42e1	0.112187
Igsf11	0.287647	Ano5	1.42056	A530017D24Rik	0.153466	Nrl	1.13	Tiparp	0.112175
Ins1	0.287204	Metrn	1.4199	Zfp52	0.153435	LOC552882	1.13	Lyrm2	0.112091
Ly86	0.287109	Trpc2	1.41868	Creb3l4	0.153195	Gm4117	1.13	Zfp964	0.112077
Bcs1l	0.286917	Il1rn	1.41736	Cd86	0.153182	Sptbn1	1.13	Gm5918	0.112048
Cisd3	0.286906	1110034A24Rik	1.41379	Ankrd28	0.153034	1110015O18Rik	1.13	Flt3l	0.11198
Tle3	0.286715	Bend4	1.41337	Fgd4	0.153015	Cdh7	1.12	Slc25a12	0.11191
Lyplal1	0.286709	Tctn1	1.41258	Hmgn5	0.153012	Aldh1l2	1.12	Capza1	0.111876
2700038G22Rik	0.286694	Rfc1	1.41076	Cops2	0.153009	Gm15821	1.12	Zfat	0.111723
Fam107b	0.286653	Gatad2b	1.41048	Zfp874a	0.152967	Cdc20	1.12	Best3	0.111613
Rsad2	0.286555	Srrt	1.40715	Katnbl1	0.152932	Ttc5	1.12	Scn8a	0.111604
Hspa1b	0.28652	1810037I17Rik	1.40713	Gm15918	0.152904	Diaph3	1.12	Runx1t1	0.111531
Hist2h4	0.286274	Katnb1	1.40688	Cnksr3	0.152773	Edil3	1.12	Ewsr1	0.111493
Abhd14a	0.286147	Hspa14	1.4045	Tspear	0.152754	1700125H20Rik	1.12	5430437P03Rik	0.111439
Rbmx2	0.286058	Fam5b	1.40445	Gm17767	0.152713	Kcnh7	1.12	Dhdh	0.111412
Eda2r	0.285912	H2-Ob	1.40339	Col6a1	0.152631	Hormad2	1.12	Map4k4	0.111374
Zfp69	0.285813	Rangap1	1.40209	Inhbb	0.152618	2600002B07Rik	1.12	2700094K13Rik	0.111354
Ubc	0.285744	Odf2	1.39882	Pcmtd1	0.152604	Tbc1d31	1.12	Rnmtl1	0.111308
Mras	0.285512	Siah1b	1.39833	Cd300ld	0.152505	Efcab3	1.12	Mboat7	0.111215
1700113A16Rik	0.285456	Ankdd1b	1.39827	Cep72	0.152476	5530400C23Rik	1.12	Fxn	0.111108
Strip2	0.28537	Als2cr4	1.39758	Zfp120	0.152411	AU019796	1.12	Zcchc2	0.111064
Pigu	0.285133	Capn12	1.39584	Actn3	0.152265	Galntl6	1.12	Fn3krp	0.111045
Ndufa5	0.284862	Ccdc151	1.39362	Dsel	0.152195	Mybph	1.12	Cln6	0.111003
Mrp63	0.284777	Fstl5	1.39283	9330102E08Rik	0.152183	Gzmg	1.12	Crtc2	0.110973
Eef1d	0.284675	Siva1	1.3927	Zbed3	0.152095	4933432I03Rik	1.12	Klhdc8b	0.110796
Mien1	0.284513	Spred1	1.39242	Steap2	0.152039	Ncapg2	1.11	Gstt1	0.110684
Oacyl	0.284491	Gm5145	1.39068	Cx3cr1	0.15192	Enpp2	1.11	Lrch1	0.110583
Fam65b	0.284437	Dtna	1.39062	Cdk8	0.151903	Exo5	1.11	Ppig	0.110572
Car8	0.284389	Traf3ip1	1.3883	Itga10	0.151726	Acsl1	1.11	Flrt1	0.110571
Haus6	0.284364	Dot1l	1.38772	Zfp937	0.151674	Tub	1.11	Kif16b	0.110566
Dtnb	0.284163	Meaf6	1.38746	Ptbp3	0.151639	Myom2	1.11	Npr3	0.110557
Tssc4	0.284111	Csrp2	1.38716	Car10	0.15149	Prrc2a	1.11	Prr7	0.110546
Pold4	0.284032	8030411F24Rik	1.38697	Stag1	0.151452	Mtl5	1.11	Tcf19	0.110516
Chchd5	0.28403	Tchp	1.38603	Arl5a	0.1513	Ankrd6	1.11	Ppp1r3d	0.110453
Serpina7	0.284009	Sip1	1.38434	Gm12976	0.151285	Dqx1	1.11	D3Ertd751e	0.110437
Elf3	0.283987	Ramp2	1.38402	Stradb	0.151237	C85445	1.11	Pdgfrl	0.110384
Grk5	0.28388	Irak3	1.3838	Il18bp	0.151165	Fbxw19	1.11	P2ry1	0.110237
Fam149b	0.28361	8430406I07Rik	1.38304	Gm10125	0.151149	C030045M22Rik	1.11	Fam123b	0.110229
Mag	0.283239	A230083G16Rik	1.38213	Parp16	0.15113	Rnf133	1.11	B830017H08Rik	0.110214
Dnaic1	0.28313	Lrrc8b	1.38174	Gabrb3	0.151086	1700016K19Rik	1.11	Daam2	0.110143
Rab30	0.283079	Stat4	1.38152	6820431F20Rik	0.151006	4930403O18Rik	1.11	Tmem140	0.110111
Pcdhb20	0.283067	Dnahc7b	1.3813	Edem1	0.150981	Wdr86	1.11	Tmem184b	0.110105
2610307P16Rik	0.283027	Mesdc1	1.38057	Cdh7	0.150979	G630016G05Rik	1.11	Snx16	0.110092
Tescl	0.282949	Fbxl13	1.38024	Gm49760	0.150673	2010309G21Rik	1.11	Camk2n1	0.11008
4930441O14Rik	0.282924	Ano7	1.37987	Mettl25	0.150454	Epha10	1.11	Spata2l	0.109963
Palm2	0.282849	Ccdc111	1.37794	Dzank1	0.15022	Pbx4	1.11	Celf5	0.109954
Bach2	0.282847	Fam175a	1.37773	Zfp946	0.150087	4933439G19Rik	1.11	1500011H22Rik	0.109875
Myeov2	0.28263	Hecw2	1.37747	Gm20518	0.150013	Slc6a3	1.11	Skil	0.109808
1700007K13Rik	0.282588	Tarbp2	1.37737	Pcdh17	0.149934	Fam111a	1.1	Cpd	0.109765
1700037C18Rik	0.282415	Suz12	1.37629	Ppp1cb	0.149921	Acsm2	1.1	E130309D14Rik	0.109654
Coasy	0.28234	Wbp7	1.37586	Cd74	0.149842	C77058	1.1	Arl10	0.109614
Samsn1	0.281962	Sephs1	1.37389	Fam8a1	0.149808	Rbm42	1.1	Pias1	0.109602
Rhpn1	0.281679	Tmem86b	1.36965	Picalm	0.149746	Mtus2	1.1	Ccdc72	0.109561
Lgals3bp	0.281595	Pln	1.36863	Vwa5b1	0.149717	Wfdc12	1.1	Ptp4a3	0.109551
Babam1	0.281515	1700048O20Rik	1.36691	Pdpk1	0.149655	Nr4a3	1.1	Gzmm	0.1095
Aqp11	0.281317	Setd1a	1.36643	Pcyt1b	0.149586	Esrrb	1.1	Osbp2	0.109485
Epsti1	0.2811	Hic1	1.36526	Cerkl	0.149556	Lor	1.1	Dzip1	0.109402
Camk4	0.281	Gpr4	1.36485	Zmym6	0.149445	Sla2	1.1	Sncb	0.10939
Eya1	0.280871	Nup35	1.36387	Stard4	0.14936	Igll1	1.1	1200011I18Rik	0.109353
Gprc5c	0.28074	Xrcc1	1.36309	Atrx	0.149344	Mcpt1	1.1	Tusc1	0.109285
Ankrd37	0.280291	Nup54	1.36304	Qpct	0.149273	Pik3cd	1.1	Dhfr	0.109277
Atp10a	0.280217	Nat2	1.36277	Zfp78	0.149263	9230102K24Rik	1.1	Dtd1	0.109267
Dcdc2b	0.280044	Ssrp1	1.3621	Cp	0.14916	Gm12300	1.1	Nr2c2ap	0.109256
Ehf	0.27998	Col25a1	1.36206	4930488L21Rik	0.149158	Dlx4os	1.1	Cep63	0.109218
BB557941	0.279904	Sept5	1.36175	Carnmt1	0.149052	AU022245	1.1	Kcnh8	0.109209
Pgls	0.279862	Dusp15	1.36152	Gpr155	0.148997	Arhgef25	1.1	Kif22	0.109186
Car7	0.279787	Papd7	1.36142	Kcnab1	0.148863	Zfp286it	1.1	Sgk2	0.109152
Ffar3	0.279639	Upk3a	1.36076	Gm5422	0.148857	Dhx38	1.1	Pigu	0.109064
Pdia5	0.279267	Lrrc40	1.36031	Gm30239	0.148844	AU015696	1.1	Fancd2	0.109007
Cblc	0.278941	Abcb1b	1.36017	1700016P03Rik	0.148816	C030018P15Rik	1.1	Cd82	0.108808
Lrrc25	0.278902	Pms1	1.35953	Cacna2d1	0.148801	Psmg4	1.1	Slc12a6	0.108783
Cd209a	0.278831	Hmgb1	1.35933	Ide	0.148799	4932442E05Rik	1.1	Pnpla7	0.10875
Cln6	0.278685	Ppox	1.35918	1810008I18Rik	0.148746	Hbb-b2	1.09	Cntfr	0.108717
Suv39h2	0.278676	Stra13	1.35901	Gpr158	0.148661	Hspb7	1.09	Tacc3	0.108483
Vasn	0.278576	Slc44a2	1.35752	P2ry1	0.148572	Adgra3	1.09	Lrtm2	0.108469
Lmf2	0.278489	Gm9705	1.35704	Tlr3	0.14848	Il11	1.09	Osbpl3	0.108443
1110001J03Rik	0.278007	Orc6	1.355	Lgr5	0.14846	9530097N15Rik	1.09	2410089E03Rik	0.108423
Tmtc1	0.277925	Ipo9	1.3546	Bbs7	0.14839	Phactr4	1.09	Gemin4	0.108304
Rpl27a	0.277909	Ptpru	1.35423	Mctp1	0.148367	4632404M16Rik	1.09	N6amt2	0.108293
Bora	0.277786	Trim66	1.35243	Arhgap26	0.148291	Bdkrb2	1.09	Upf3a	0.108225
Rpl28	0.277721	Pgp	1.35198	9430021M05Rik	0.148215	C530014P21Rik	1.09	Ano1	0.108221
N4bp2l1	0.27769	Fhl4	1.35192	Gm14325	0.148143	Tulp3	1.09	Ccdc55	0.108138
Abcc12	0.27761	Impa2	1.34936	A230056P14Rik	0.148091	Tbc1d30	1.09	Eif2c2	0.108071
Tmsb10	0.277564	Kcnrg	1.34873	Tmem220	0.148087	C130036L24Rik	1.09	Osbpl6	0.107932
Hbs1l	0.277312	Sept3	1.34847	Yes1	0.148044	Sult6b1	1.09	Cycs	0.10781
Zmat5	0.277308	Calm3	1.34704	Ttc37	0.147956	4933425D22Rik	1.09	Ddit4	0.107747
Slc43a2	0.277228	Cbln3	1.34663	Gm45447	0.147922	Trim75	1.09	Galnt4	0.107734
Clic6	0.277194	Obsl1	1.34637	Pot1b	0.147905	Lypd5	1.09	Coq6	0.107691
Grap	0.276926	Hcn2	1.3461	Gm21092	0.147857	Hba-a2	1.09	Cacnb3	0.107676
Dek	0.276649	Nrp2	1.34585	Gm3604	0.147682	Rnase2a	1.09	Lyrm7	0.107654
Psph	0.276608	Lin52	1.34426	Flacc1	0.147602	4930592I03Rik	1.09	Cacna1b	0.107549
Cox7a2	0.276591	Pipox	1.34211	Zbtb33	0.147494	Pnoc	1.08	Usp53	0.107534
Pex11c	0.276572	Ubap2	1.34143	Gm49463	0.147285	Pask	1.08	Nbea	0.107484
Ap3s1	0.276558	Col12a1	1.34096	Tex9	0.147224	Gm10575	1.08	Xkr4	0.107439
Dut	0.276553	Mfge8	1.34068	Brwd3	0.147077	6430553K19Rik	1.08	Wdtc1	0.107405
Slc9a9	0.276447	Cep57	1.34062	4933428C19Rik	0.147043	Myh7	1.08	Eda2r	0.107394
Rpl10a	0.276195	Atp2b4	1.33974	Stra6l	0.147013	Dlx3	1.08	Selm	0.107361
Tmem206	0.276038	Ankrd26	1.33946	Il31ra	0.146929	Fgr	1.08	4930594C11Rik	0.107331
Ptpn7	0.275943	6530418L21Rik	1.33746	Plcb4	0.146822	Aldh7a1	1.08	Limd1	0.107303
D630045J12Rik	0.275933	Etaa1	1.33735	Meg3	0.146761	4930438A08Rik	1.08	Trappc2l	0.107291
H1fx	0.275909	Wwc2	1.33668	Zfp595	0.146715	Lmod2	1.08	Dtx4	0.10729
Hepacam2	0.275794	Pik3c2b	1.33369	Mtmr1	0.146517	AA408456	1.08	Plxdc2	0.107285
Lrrn2	0.275515	Gstt2	1.3332	Cenpj	0.146454	Cdyl2	1.08	Fars2	0.107113
1700003M07Rik	0.275272	1810011O10Rik	1.33263	Kifap3	0.146381	Slc13a3	1.08	Grina	0.107042
Myof	0.275084	Pak4	1.33042	Spag9	0.146271	Krtap6-5	1.08	Znrd1as	0.106992
Atp5k	0.275069	Fat4	1.33002	Sp3	0.146238	Gm17619	1.08	Atp11b	0.106961
Hspe1	0.275005	2810055F11Rik	1.32959	9330182L06Rik	0.146084	Lrrtm4	1.08	Unkl	0.106917
Atf7ip	0.274866	Pagr1a	1.32944	Clmp	0.146062	Dydc1	1.08	Mrpl42	0.106886
Pcbd1	0.27485	Napsa	1.32944	Rab39	0.146009	Stk17b	1.08	Sh2d5	0.106802
Thop1	0.274824	Prnd	1.32824	Zfp473	0.145977	4930579H20Rik	1.08	Tbca	0.106793
Nup62	0.274471	Ctps	1.32783	Bicd1	0.145902	Ube2t	1.07	Gm11818	0.106787
Inpp5j	0.274383	Angptl3	1.32767	Gad1	0.145832	Wdr37	1.07	Casq2	0.106778
Fbxo27	0.274096	Tpte	1.32658	Emb	0.145788	D8Ertd503e	1.07	Diexf	0.106757
Serinc2	0.274013	Olfr921	1.3258	Chd8	0.145753	Brd1	1.07	Dhx38	0.106728
Pxmp4	0.273998	Ahcy	1.32448	Ttll7	0.145716	Cenpp	1.07	Ttc1	0.106709
1700019D03Rik	0.273997	Loxl3	1.32402	Snhg18	0.145646	2010001A14Rik	1.07	Slc2a5	0.106671
Fgl1	0.273884	Usp49	1.32363	Gm15663	0.145644	Coprs	1.07	Vwa5b2	0.10655
Sh3tc1	0.273804	Gprc5a	1.32317	Mbnl2	0.145551	Znrf4	1.07	Gspt2	0.106548
Sod3	0.273776	Lims2	1.32243	Ubqln2	0.145517	Cenpm	1.07	G6pc2	0.106486
Atp5h	0.273743	Lrfn5	1.32144	Uri1	0.1455	Trim42	1.07	Klhl29	0.106421
Thg1l	0.27332	Nsmce4a	1.32111	Fam184a	0.145449	Gm35915	1.07	6230409E13Rik	0.106416
Lyz2	0.273185	Gins4	1.32058	Zfc3h1	0.145365	Tdrd7	1.07	Tmem106c	0.106372
Rps11	0.273092	B3galtl	1.32	Erbin	0.145349	Rnf144b	1.07	Ralgps1	0.106369
15-Sep	0.273034	Gm4353	1.31986	Fancm	0.145181	Drosha	1.07	Lrdd	0.106358
Acacb	0.272956	Exosc2	1.31901	4933406P04Rik	0.145177	Slc22a29	1.07	Sytl5	0.106226
Gins4	0.272875	Top3a	1.31899	Cdadc1	0.145164	Obp2a	1.07	Ccdc162	0.106173
Coprs	0.272867	Apaf1	1.31838	Mtmr6	0.145145	Ttc39d	1.07	Lenep	0.106166
Lrrc14b	0.272839	Itgb3bp	1.31822	Gm29724	0.145076	4930455C13Rik	1.07	Dgkz	0.106163
Cdkn2aipnl	0.272658	Pole3	1.31719	Trp53inp2	0.145055	Cyp2c65	1.07	Dis3l2	0.106147
Pcyox1l	0.272623	1700025G04Rik	1.31606	Rev3l	0.145028	Syt8	1.07	Rnf182	0.106138
Ttc28	0.272617	Rfpl4	1.31569	Ogt	0.144998	Fasl	1.07	Prickle2	0.106123
Pou2f2	0.272479	Smchd1	1.31534	Braf	0.144993	Cmss1	1.07	Loxl3	0.106118
4632428C04Rik	0.272403	Fam48a	1.31379	Cited2	0.144973	1700023A20Rik	1.07	Foxo4	0.105993
Shisa5	0.272173	Suv420h2	1.31132	Mzf1	0.144943	4930520O04Rik	1.07	Mcm2	0.105832
Ppib	0.271911	Fgf2	1.31126	Tmem68	0.144924	Gm15523	1.07	Maml3	0.105792
Atp5j2	0.271772	Nmral1	1.3109	Mfsd4b3-ps	0.144777	Slc13a4	1.07	Zfp526	0.105727
Coro2b	0.271707	Ngf	1.31087	Srsf4	0.144714	Chodl	1.07	R3hcc1	0.1057
Cep44	0.271696	Mab21l1	1.31029	Mmgt1	0.14469	Etfdh	1.07	Rfc3	0.105697
Retsat	0.271489	Ube2u	1.30907	Lcp1	0.144653	Asb2	1.07	Unc119	0.105524
Tek	0.271327	Ppfibp2	1.3088	Trappc8	0.144622	Irs4	1.07	Gm572	0.10551
Map2k6	0.271322	Sycp2	1.30704	Anxa9	0.144395	Prss45	1.07	Rabgap1l	0.105451
1810037I17Rik	0.271043	Rdbp	1.3066	Sox6	0.144365	Gm16049	1.07	Esrp2	0.105401
Asna1	0.270953	Asxl1	1.30632	Tmbim4	0.144334	C1qa	1.06	Xpr1	0.105376
Focad	0.270835	Bach2	1.30629	Carf	0.144281	B3galt1	1.06	Agpat4	0.105369
Garem	0.270501	Tsx	1.30358	Tnfrsf11b	0.14428	Wdr77	1.06	Ankrd33b	0.105344
Sssca1	0.270253	Snx29	1.30337	Gm10517	0.144274	Ttk	1.06	Stx17	0.105313
Rpl12	0.269602	Nkx6-2	1.30242	Tut4	0.144241	Hcn1	1.06	Rcan2	0.105284
Rab27a	0.269501	Anp32e	1.30222	Top1	0.144166	4921509O07Rik	1.06	Gcnt4	0.10524
4930422G04Rik	0.269397	Gm10037	1.30205	Gstm5	0.144159	Fbxw10	1.06	2610034B18Rik	0.105236
2210016L21Rik	0.269274	Smarcc1	1.29943	Pycr1	0.144098	Hnrnpc	1.06	Trp53i13	0.105228
Cd52	0.269264	Shd	1.29943	Insm1	0.143869	2900092N22Rik	1.06	Cpt1c	0.105189
Igsf5	0.269239	Azi1	1.29891	Hook1	0.143796	Gm4415	1.06	0610040J01Rik	0.105186
Slc44a3	0.268809	Hnrnpul1	1.29681	Rfesd	0.143789	Helb	1.06	Dcaf8	0.105145
Trp53inp1	0.268756	Cenpc1	1.2968	Sorl1	0.143749	Krt72	1.06	Racgap1	0.105097
Rpsa	0.268738	Raver1	1.29584	Samd13	0.143744	Gm15247	1.06	Zfp787	0.105078
Aqp1	0.268396	Polr2a	1.29521	Clec4n	0.143734	1700018B24Rik	1.06	Gstz1	0.105071
Zfp366	0.268306	Lyar	1.2948	Rab32	0.143726	Fam13a	1.06	A330035P11Rik	0.104997
Ifi205	0.268197	Baz1a	1.29205	Cdc14b	0.143606	1700037H04Rik	1.06	Ppp3ca	0.104964
Cinp	0.268127	Mpp1	1.29174	Gm4419	0.143587	Spaca7	1.06	Pqlc2	0.10494
Dusp23	0.267919	Reep2	1.2915	Stk17b	0.143578	Krt24	1.06	Mob1b	0.104843
Glrx	0.267871	Ppt2	1.29085	5730414N17Rik	0.143434	Adra2b	1.06	Baiap3	0.104829
Cabp7	0.267656	Hmgxb4	1.2907	1700102H20Rik	0.143349	A630012P03Rik	1.06	Slc43a2	0.104806
Rasgrf2	0.267647	2610027L16Rik	1.28959	Dgkg	0.143281	Slc17a2	1.06	Tfrc	0.104789
Jakmip1	0.2676	Rad23a	1.2887	Ifit3	0.143234	4933408N05Rik	1.06	Pcmtd1	0.104772
Ggact	0.267561	Xpo1	1.28681	Nkapl	0.143144	C87977	1.06	Lmbr1	0.104768
Tmbim4	0.267488	Phactr2	1.2863	Ano7	0.143023	Nlrp10	1.06	Gja1	0.104694
Park7	0.267328	Nsmce1	1.28626	Aoc3	0.143008	C730036E19Rik	1.06	Snrpb2	0.104669
Mlph	0.267255	Tmem71	1.28518	Pclo	0.142949	Gm3579	1.05	Rc3h2	0.104662
Cntd1	0.267241	Pappa	1.28511	Htr1b	0.1429	Tbl2	1.05	Ctc1	0.104659
Clcn7	0.267142	Btbd8	1.2849	Igip	0.142878	Vwce	1.05	Cacnb2	0.104624
Apobr	0.267099	Paqr5	1.28477	Lonrf3	0.142837	Gm33738	1.05	Mlkl	0.104601
Terc	0.267092	Dnahc12	1.28448	Asns	0.142714	Pparg	1.05	Oprl1	0.104569
Ints1	0.266913	Gpc2	1.28254	Alms1	0.142688	D4Ertd335e	1.05	Lrrc47	0.104551
Tmprss2	0.266888	2310033E01Rik	1.28202	Adamts2	0.142687	Cdc42bpa	1.05	Mef2a	0.104547
Pigt	0.266686	Brd9	1.28172	Abce1	0.142681	Col6a5	1.05	Zhx3	0.104444
Slc35c2	0.266629	Sipa1l2	1.2817	Fxr1	0.142671	Igfbpl1	1.05	Erap1	0.104367
Pam16	0.266561	Foxn1	1.28162	Gm42670	0.142654	Slamf6	1.05	Bzrap1	0.104365
Cebpa	0.266445	Emp2	1.28146	Dubr	0.142651	Rbm15b	1.05	Ogdhl	0.104313
Fam187b	0.266287	AW146020	1.28091	Nus1	0.142635	4932437C15Rik	1.05	Ankrd28	0.104298
Fpr1	0.266275	C2cd5	1.27915	Swt1	0.142541	Pibf1	1.05	Mapkbp1	0.104265
Gpsm3	0.266273	Nptx2	1.27814	D330050I16Rik	0.1425	Trim15	1.05	Asxl2	0.104262
Npl	0.266151	Tmem45b	1.27579	Gpalpp1	0.142482	Asprv1	1.05	Calhm2	0.104253
Itga2b	0.266139	Ccdc87	1.27539	H2-Ab1	0.142477	Gm16630	1.05	Pclo	0.104213
Lurap1l	0.266093	Astn1	1.27497	Tmem245	0.142474	D4Ertd117e	1.05	2610528J11Rik	0.104152
Cnbd2	0.265965	Cbln4	1.27409	Paip2b	0.142463	Pnpt1	1.05	Zfp622	0.104124
Eef1g	0.265918	Tspan4	1.27369	Rpgr	0.142461	2810416A17Rik	1.05	Ccdc30	0.104075
Tgm5	0.265902	Zfp773	1.27365	Gm18541	0.142245	D5Ertd215e	1.05	Setdb2	0.103993
Rnf144b	0.265761	Eif4e3	1.27316	H1f3	0.142188	Fam19a3	1.05	Fmo5	0.103965
Il4ra	0.265683	Ttc9c	1.27253	Ttc21b	0.142146	Vapa	1.05	Lrrc32	0.10395
Csda	0.26568	D430041D05Rik	1.27246	Scg3	0.142119	Irs3	1.05	Rilpl1	0.103949
Zbtb14	0.265426	Nup43	1.27245	Rimkla	0.142119	Csdc2	1.05	Tssk6	0.103906
Msh3	0.265404	Dennd4b	1.27156	Smim17	0.141972	Flt3	1.05	Slc36a1	0.103883
Slc39a8	0.265171	Nop56	1.27007	Zfp53	0.141941	Hyal6	1.05	Dlgap2	0.103855
Commd3	0.265165	Cplx1	1.27003	Tbc1d32	0.141922	AU022166	1.05	Tgds	0.103812
Uqcrb	0.265146	Il33	1.26959	Msmo1	0.141886	Klhl6	1.05	Ddx19b	0.103757
Gba	0.265107	Ramp3	1.26958	Ints6l	0.141852	6430605C03Rik	1.05	Rsl1	0.103735
Crim1	0.265031	Nin	1.26889	Lonrf2	0.141734	AA414992	1.05	Ddx58	0.103728
Tex26	0.265029	4922505G16Rik	1.2682	Crebrf	0.141717	Slc6a8	1.04	6530418L21Rik	0.103534
Dnajc19	0.265027	Gm14295	1.26673	Gm9776	0.141713	Ptges	1.04	Pkn1	0.10347
Calml4	0.264995	Icam5	1.26525	Nudcd1	0.14163	Dmc1	1.04	Klf10	0.103455
Frmd5	0.264931	Sh3rf3	1.26469	Ugt8a	0.141607	Aoah	1.04	Retsat	0.103454
Hist1h2bh	0.264757	Clca1	1.264	Acoxl	0.141583	Pla2g4d	1.04	Slc30a8	0.103426
Idua	0.264597	Fbxl22	1.26373	Per2	0.14156	Krtap6-2	1.04	Nqo1	0.103413
Gm10785	0.264546	Unk	1.26348	Zfp809	0.141535	Mb	1.04	Zdhhc2	0.103404
Nrcam	0.264511	Adamtsl4	1.26188	Ldlrad4	0.141495	Gm568	1.04	Spint1	0.103392
Pold2	0.264461	Wrap53	1.26135	E030042O20Rik	0.141477	Fer1l4	1.04	Efcab2	0.103388
Amot	0.264402	Crat	1.26133	Tasor	0.14142	8030476L19Rik	1.04	Vrk2	0.103335
Rangap1	0.264326	Dlgap3	1.26081	Gm20186	0.141392	Pde10a	1.04	Serpina10	0.103257
Tmem37	0.263895	Mfsd7c	1.26023	Naalad2	0.141311	Hephl1	1.04	Mlxipl	0.103237
Padi2	0.263821	Pmel	1.25928	Oxr1	0.141192	Gabra1	1.04	Lonrf3	0.103225
Wipi1	0.26376	Tmem43	1.25903	Hfm1	0.141077	Lrrc49	1.04	Nkrf	0.103179
Ncln	0.263544	S100a10	1.25851	Oas1c	0.140964	Clec4b1	1.04	Sh3bp2	0.103068
Pqlc2	0.263316	5930403N24Rik	1.25845	Rabl3	0.140961	4930507D10Rik	1.04	Csnk1e	0.102907
Agpat3	0.26303	Dclk2	1.25807	Slc44a1	0.140945	Tonsl	1.04	Adc	0.102896
Prss2	0.262962	Prpf40b	1.25758	H2-Q6	0.140872	Pldi	1.04	Epm2a	0.102801
Idh2	0.262883	Olfr1233	1.25717	Slc11a1	0.140738	Plekhg3	1.04	Sepsecs	0.102796
Dynlrb1	0.262873	Dvl2	1.25668	Gm8091	0.14073	Ifna2	1.04	Dbndd1	0.102775
Xkr4	0.262795	Hcfc1	1.25644	Nsd3	0.140728	5033423K11Rik	1.04	1700007L15Rik	0.102623
E2f2	0.262736	AW554918	1.25571	Rabgap1l	0.140665	Gm10229	1.04	Rxra	0.102604
Phf11d	0.26269	Gm9791	1.25402	G6pc2	0.140651	Ugt2a3	1.04	Scaper	0.102598
Mthfd2	0.262619	Ywhah	1.25256	Lrrc39	0.140625	Ppat	1.04	9130221H12Rik	0.102499
Echdc2	0.262585	Snrpa1	1.25235	Zmym2	0.140567	2410006F04Rik	1.04	Pcdhga12	0.102467
Tmem51	0.262332	Rfx8	1.25116	Slc25a40	0.140481	Krtap13	1.04	Gpr158	0.102464
Chchd3	0.262268	Ppwd1	1.25116	Gm46136	0.140397	Gm8154	1.04	Dock1	0.102348
Mrps24	0.262145	Mis12	1.25085	St18	0.140382	Trim33	1.04	Zfp637	0.102311
Rgs3	0.262131	Mast2	1.24915	Lrrc36	0.140366	Tmem225	1.04	Insrr	0.10229
Mmd	0.262096	Tubb4a	1.24895	Cttnbp2	0.140339	Timm8a2	1.04	Rspo4	0.102225
Rasl2-9	0.262083	Alms1	1.24864	Cdc27	0.140208	Pole2	1.03	Smc2	0.102146
Grb7	0.262082	Blvrb	1.24712	Mfap1a	0.139975	Fkbp11	1.03	Micalcl	0.10214
9130401M01Rik	0.261996	1500011H22Rik	1.24596	Fat3	0.139969	Upk3b	1.03	Nt5c2	0.102129
Mat1a	0.26195	1700010I14Rik	1.24451	Itih4	0.139931	Npn2	1.03	Alkbh2	0.10212
Bmp15	0.261932	Tsga14	1.24374	Mblac1	0.139915	Raf1	1.03	Scarb1	0.1021
2610034B18Rik	0.261693	Agbl5	1.24371	Syt17	0.139769	Cdca2	1.03	Sema4c	0.10208
Tubgcp2	0.26149	Otud1	1.24358	Gm11529	0.139701	Prkcg	1.03	2010300C02Rik	0.102029
Naga	0.261133	Myl4	1.24349	D1Ertd622e	0.139673	Pebp4	1.03	1110007C09Rik	0.102027
Ramp2	0.260984	Cetn4	1.24164	Vps13a	0.139672	Zbtb32	1.03	Ncor1	0.101957
Hmha1	0.260779	Pot1b	1.24159	Dhx40	0.139654	D630045J12Rik	1.03	Chchd2	0.101876
Pradc1	0.260691	Tert	1.24153	9430065F17Rik	0.139608	5930427L02Rik	1.03	Ppp2r5a	0.101846
Gltp	0.260668	Fsd1l	1.23938	Pank3	0.139558	4930456K20Rik	1.03	Lin54	0.101803
Ccdc101	0.260351	Selenbp1	1.23792	Gins3	0.139538	5830495A06Rik	1.03	Hsf2	0.101704
Dynlt1b	0.260326	Lama1	1.23716	Usp47	0.139502	Igbp1b	1.03	Zranb3	0.101691
Tmem9	0.260263	Fhod1	1.23682	Dock7	0.139469	Opn4	1.03	Pcyox1	0.101618
Negr1	0.260084	Nhedc2	1.23654	Txndc16	0.139396	Muc5b	1.03	Chst2	0.10161
Swi5	0.2599	Lrrc56	1.23649	Cfap43	0.139357	Krtap4-2	1.03	Aqp11	0.101602
Pcdhgb1	0.259847	Thsd1	1.23596	Gm4204	0.139346	Otop3	1.03	Pfkfb3	0.101562
Slc19a1	0.259743	1700017B05Rik	1.23531	Dennd11	0.139285	Gkn1	1.03	Gm11992	0.101545
Cyp4b1	0.259707	Oas1g	1.23462	Fmnl2	0.139262	Naip1	1.03	Slc24a6	0.101523
Neu1	0.259259	Kcns3	1.23387	Styk1	0.139218	4930579F01Rik	1.03	Gm9776	0.101415
4933433G15Rik	0.25884	Upk1a	1.23384	Nmbr	0.139179	Prr9	1.03	Wdr6	0.1014
Gmpr2	0.258628	Ldb2	1.23377	Gsdma	0.139177	Sim2	1.03	Echdc3	0.101349
Gbp2	0.25851	Cd9	1.23369	Sap30	0.139168	Wif1	1.03	Zdhhc3	0.101268
Nat2	0.258378	Nfya	1.23329	Pmel	0.139138	Hoxb9	1.03	Lrrc16a	0.101234
Dock10	0.25832	Gm684	1.23303	2610301B20Rik	0.138989	Psma8	1.03	Slc30a4	0.101183
Nedd8	0.258164	Coch	1.23279	Rgs17	0.138982	Kcng1	1.03	Mical2	0.101158
Serpina10	0.258016	Slc9a3r1	1.23211	Cltrn	0.138982	Defb19	1.03	Spry4	0.101131
Snd1	0.258013	Hdgfrp2	1.23078	Dynll1	0.138938	Aldh9a1	1.02	Ubxn10	0.101035
Sgk2	0.257643	4933427D14Rik	1.23034	Gm32391	0.138895	Rhd	1.02	Eif2c4	0.101002
Crb1	0.25757	Garnl3	1.22916	Vegfc	0.138878	Ccnb2	1.02	6430704M03Rik	0.100986
Lsmd1	0.257378	Robo3	1.22837	Gm49797	0.138809	Cks2	1.02	Rps6ka2	0.100949
Zbed3	0.257191	Ly6g5b	1.22751	Ubr3	0.138762	Dpys	1.02	Ncoa2	0.100939
Ndufa12	0.257043	Fyn	1.22733	Rps6ka3	0.138752	Sgol2a	1.02	Hnrnpd	0.100936
Rnf150	0.256599	Clec4a1	1.22703	Mosmo	0.13873	Ywhag	1.02	Ubqln2	0.100853
Ucn3	0.256494	Mre11a	1.22682	Megf10	0.138705	Kdm5d	1.02	Pcnx	0.100821
Snrnp25	0.256386	Map2k6	1.22567	Lst1	0.138653	5730521K06Rik	1.02	Nfatc2ip	0.100784
Nipal1	0.256353	Cldn15	1.22542	Mpp5	0.13857	Hbb-bh1	1.02	Pdxp	0.100763
Vars	0.256282	2810006K23Rik	1.22446	Prorp	0.138442	Wdr20	1.02	Foxp2	0.100759
Cpt2	0.256282	Vangl2	1.22427	Ahctf1	0.138295	Als2cr12	1.02	Rab35	0.100722
Klk1b4	0.256154	4930595D18Rik	1.22325	Wdr44	0.138278	Wdr4	1.02	Mier1	0.10065
Frk	0.25609	March1	1.22096	Runx1t1	0.138263	Krt34	1.02	Znrf3	0.100643
Themis2	0.256089	Brd8	1.2204	Gm46620	0.138189	Dbx1	1.02	Tmc7	0.100602
2410015M20Rik	0.25605	1700011H14Rik	1.22034	Myt1	0.138129	Rrad	1.02	Pcgf3	0.100582
Galns	0.256015	Odf2l	1.21909	Ankrd34c	0.13808	Krt82	1.02	Plekha5	0.10053
Ascc2	0.255775	Npm2	1.21908	Amn1	0.137971	Tmem239	1.02	Zc3h6	0.100455
Cln3	0.255575	1700104B16Rik	1.2189	Mospd2	0.13797	Zcrb1	1.02	Vdac3	0.100429
Mapk10	0.255416	E2f3	1.21825	Srek1	0.137965	Gm30878	1.02	Ociad2	0.100409
Rps26	0.255275	Cstad	1.21812	Fam135a	0.137717	1700099I09Rik	1.02	Usp3	0.100343
Ptpn6	0.255096	Gabpb1	1.21791	Cfap36	0.137636	4933436I20Rik	1.02	Ptprm	0.100341
Uox	0.255017	Wdr31	1.21743	Mettl9	0.137572	AY512915	1.02	Coq7	0.100303
Car10	0.255013	Slc25a2	1.21707	Stxbp4	0.137425	Hapln4	1.01	Zfp334	0.100247
Ska2	0.254906	Pir	1.2156	S100pbp	0.137364	Atad2	1.01	Fam163a	0.100235
Hpgds	0.254863	Phactr4	1.21555	Pkib	0.137354	AA414903	1.01	Cln3	0.100213
Fbxl8	0.254751	Snrpa	1.2149	Cish	0.137334	4930404K06Rik	1.01	Gm13375	0.10021
Nudt21	0.254724	Ndufa5	1.21473	Armh4	0.137323	Mif	1.01	Use1	0.100186
Slc7a11	0.25467	Slc39a2	1.2147	Rps6ka5	0.137317	6330409D20Rik	1.01	Pnkd	0.100098
Slfn8	0.254568	Tmem107	1.21465	Tekt5	0.137154	Ifitm6	1.01	4933407H18Rik	0.100096
Poll	0.254519	Dclre1b	1.2145	Csf1r	0.137077	4930488L21Rik	1.01	Cdh2	0.100079
Clstn2	0.254301	Fam83b	1.21444	Eva1a	0.137035	Crabp1	1.01	Arid2	0.100021
Fermt3	0.254264	Scmh1	1.21404	Frmd5	0.137017	Shbg	1.01	Nup54	0.100011
Grip1	0.254002	Rpl27-ps3	1.21334	2810405F17Rik	0.136773	P2rx3	1.01	Med26	0.0999507
Smoc1	0.253983	A930004D18Rik	1.21292	mt-Nd5	0.136722	Gm15239	1.01	Zfp458	0.0999328
Anapc15	0.253922	Lcat	1.21206	Zfp37	0.136691	4930466I24Rik	1.01	Camk1g	0.099849
Zfp41	0.253906	Wdtc1	1.21136	Atl3	0.136581	Olah	1.01	Serpind1	0.0998467
D630023F18Rik	0.253731	Tnfsf9	1.21109	Gm14634	0.136574	AA414993	1.01	Cdc42bpa	0.0998202
Abcd4	0.253609	Pigo	1.21108	Erap1	0.136494	Il1bos	1.01	Tubb1	0.0998056
Oma1	0.253568	Stard8	1.21084	Tlk1	0.136481	Emx2os	1.01	Tnks1bp1	0.0997611
Ppard	0.253526	Tmem81	1.21063	0610040B10Rik	0.136417	Anxa10	1.01	Hcn2	0.0997072
Rcc1	0.253349	Il1rl2	1.21036	Eif2s3y	0.136342	Rbmx2	1	Cdc25b	0.0996803
Apoa2	0.253286	Tsen15	1.20871	Tmem229a	0.136287	Cenpf	1	Gm16702	0.0996771
Nudt5	0.253208	St6galnac2	1.20452	1700001G11Rik	0.136272	E2f1	1	Kremen1	0.0996658
4930515G01Rik	0.253065	Timp3	1.20402	Kcnh8	0.136212	Troap	1	Mgst3	0.0996465
Tmem229a	0.253018	Wbscr27	1.20366	Gm37359	0.136147	Spag5	1	Mcart6	0.0995877
Sftpa1	0.252972	Thoc7	1.20338	Psg16	0.136094	Slc14a2	1	Phb	0.0995446
Aldh1a3	0.252959	Lif	1.2033	Tnpo1	0.136087	Kndc1	1	Kl	0.0995422
Ccdc30	0.252949	Kcnc1	1.20314	Gm26620	0.136057	Mbnl3	1	Prkar2b	0.0994902
Als2	0.25288	Snrpc	1.20251	Gm47640	0.136004	Plcz1	1	Kcnh6	0.0994761
Hdac4	0.252746	Cacna1i	1.20154	Gramd1c	0.136003	Gtf2i	1	Cep250	0.0994638
Fah	0.252735	Efr3b	1.20091	Hipk1	0.136001	Prkci	1	Scml4	0.0994637
Tmem173	0.252556	Ooep	1.19995	Nipal1	0.135999	1700018A04Rik	1	0610040B10Rik	0.0994379
Vwa8	0.252503	Slc25a31	1.19886	Cep112	0.135876	AA675344	1	Maml1	0.0994322
Tomm6	0.252495	Slc34a1	1.19681	Csrnp2	0.135863	Lingo2	1	Gfer	0.0993904
Myl7	0.252388	Vars	1.19639	Pih1d2	0.135812	Galnt6	1	Lrp3	0.0993405
Srd5a1	0.252023	Cdh4	1.19604	Tal1	0.135611	9030417H13Rik	1	Myo10	0.0993221
Cysltr1	0.25196	Large	1.19595	Mmd	0.135564	9330171B17Rik	1	Trio	0.0992695
Car2	0.251868	Apom	1.19555	Cplane2	0.135526	Cd209e	1	Tcf7l2	0.0992655
Mogs	0.251793	Notch1	1.19522	Abitram	0.135426	Tmem91	1	Enpp4	0.0992336
Rbm38	0.251737	Mapk11	1.19395	Rassf2	0.135372	4930401B11Rik	1	Syt9	0.0992274
Pmvk	0.251286	Panx1	1.19181	Manea	0.135357	L1td1	1	Ppil6	0.0991961
Noc4l	0.25121	Nfkbid	1.19122	Btaf1	0.13519	Ms4a4c	1	Psd3	0.099126
Nde1	0.250887	Cinp	1.19061	Rhno1	0.135173	Tcf23	1	Myo19	0.0991249
Paqr4	0.250833	Mif4gd	1.1895	Uba3	0.135171	Tcam1	1	Pdss2	0.099122
Mdm1	0.25079	Wdr89	1.18929	Gm27168	0.135104	Dcp1a	1	Rpgrip1l	0.0990831
Pdia4	0.250786	Prl3d1	1.18895	Rsph3a	0.135102	Sox7	1	Bcap29	0.0990268
Smim3	0.250779	Adcy8	1.18895	Rabgap1	0.135095	Reg3b	1	Rsph1	0.0990188
Evc2	0.250645	Hrasls5	1.18895	Kmt2e	0.135078	Cfhr3	1	Thrb	0.0990145
Gm4791	0.250626	Lmod1	1.18895	Naip2	0.135019	Cpvl	1	Nfu1	0.0990022
Suv39h1	0.250621	Plch2	1.18895	Sh3kbp1	0.135003	Mybl1	1	Rcsd1	0.0989199
Lipe	0.250601	Skint2	1.18895	Man2c1os	0.134979	Bpifa5	1	Zmynd8	0.0989051
Ciita	0.250481	Taar8b	1.18895	Naa30	0.134953	Nkx6-2	1	Ncoa1	0.098832
Snrnp35	0.25043	Trdn	1.18895	B230206L02Rik	0.134949	A330106F07Rik	1	Pcdh17	0.098824
Zfp524	0.25032	Arhgap31	1.18885	Prmt6	0.134746	D8Ertd268e	1	Smpd2	0.0987265
C1qtnf9	0.250172	Ppp2r4	1.18798	Gm14403	0.134696	Fndc9	1	Irf6	0.098702
Slc29a3	0.250129	Slc47a1	1.18789	1700088E04Rik	0.134645	Pax9	1	Ehhadh	0.0986576
Smpdl3a	0.250114	Lmcd1	1.18752	Setx	0.134625	Fbln7	1	AI314976	0.0986547
Slc25a30	0.250095	Ndufaf2	1.18742	Myl12b	0.134624	4930572J10Rik	1	0610009L18Rik	0.0986286
Tmprss6	0.249958	Tc2n	1.18617	Chia1	0.134592	E430025E21Rik	0.99	Gdap1l1	0.0985981
Dmtf1	0.249792	9030625A04Rik	1.18479	Ppp2r2c	0.13458	Pecr	0.99	Ubxn7	0.0985931
Mpv17	0.249773	Git1	1.18392	Taf1	0.134469	Srm	0.99	Traf3	0.098556
Rnf5	0.249738	Irf5	1.18332	Slfn5	0.134382	Prcp	0.99	Grk5	0.0985094
Ebp	0.249543	C030030A07Rik	1.18329	Xrn1	0.13426	Qpctl	0.99	Chpf2	0.0984699
H2-Q5	0.249386	Cep76	1.18245	8430429K09Rik	0.13413	Plppr1	0.99	Slc25a5	0.0983629
Sulf1	0.24927	Pmm2	1.18222	Marchf1	0.134072	Itk	0.99	Tnik	0.0983502
Gpr75	0.249186	Dgcr14	1.18095	Rap1b	0.134062	Oosp3	0.99	Rgs7bp	0.0983321
Elp6	0.249069	Dyrk1b	1.18044	Slc8a1	0.133969	Gpr4	0.99	Gcsh	0.0982497
Prdm10	0.249016	Trim28	1.1802	Calml4	0.13387	5430401H09Rik	0.99	Pabpn1	0.0981976
Cnpy2	0.248948	Tnfrsf26	1.18017	Slain2	0.133858	Capn5	0.99	Nrf1	0.0981518
Dhcr7	0.248836	Zw10	1.17954	Dnajc21	0.133709	Iqsec2	0.99	Mutyh	0.0981449
Ano7	0.248818	Pcdhga8	1.17807	Spcs1	0.133648	D5Ertd301e	0.99	Rims2	0.0979874
Uqcr10	0.24861	Gpr25	1.17745	Nqo1	0.133507	C76554	0.99	Acacb	0.0979677
Jph1	0.248269	Srsf2	1.17656	Tmem62	0.133396	1700092E19Rik	0.99	Ndufs1	0.0979506
Tap1	0.248154	4833427G06Rik	1.17543	Jrkl	0.133276	1700093J21Rik	0.99	BC068157	0.0979376
Tmem63b	0.248133	Pcyox1l	1.17519	Ttc16	0.13325	Vmn1r47	0.99	Slc12a7	0.0978834
2-Mar	0.248121	Ism1	1.17425	Hltf	0.133231	D2Ertd239e	0.99	Dusp6	0.0978612
Stat1	0.247881	Dhrs13	1.17415	Rgs7bp	0.133221	5830426K05Rik	0.99	Efna2	0.0978365
Atp5f1	0.247805	2010001M09Rik	1.17376	Exoc5	0.133123	Foxn1	0.99	Trim21	0.0977413
Cd44	0.247719	Rac2	1.17351	Prr14l	0.132833	Qprt	0.99	Cryba2	0.097696
Chst10	0.247628	Lix1l	1.17101	Cfh	0.132831	9530086P17Rik	0.99	Akap8l	0.0976004
Clcc1	0.247612	Aarsd1	1.17094	Crem	0.132752	Slco1c1	0.99	Cd2ap	0.0975926
Lmnb2	0.247489	Cdc27	1.17059	Vps13c	0.132649	Rasa4	0.99	Rhpn1	0.0975633
Fam166a	0.247395	Grid2	1.16999	Gpx7	0.132639	C030013D06Rik	0.99	Armcx4	0.0974758
Sync	0.247285	Zfp948	1.16952	Gmnn	0.132589	C79468	0.98	Nme4	0.0974732
Cd40	0.247232	Tnfrsf1b	1.16944	Col1a2	0.132543	Fgl2	0.98	A330049M08Rik	0.0974296
Hsp90ab1	0.247162	Tcof1	1.1687	Kbtbd3	0.132521	1700010H22Rik	0.98	Aig1	0.0974215
Hn1l	0.247145	Gm1661	1.16722	Zfp932	0.132506	Adrb2	0.98	Tmem88	0.0973347
Scarb2	0.247115	Fgf22	1.16722	Gm20632	0.132504	Cdca3	0.98	Rtp4	0.0972323
Osbpl1a	0.246943	Gm10030	1.16722	Vamp4	0.132491	Notch4	0.98	Pigb	0.097188
Chchd6	0.246859	Wfdc16	1.16699	Tafa1	0.132485	Cd79b	0.98	Slc31a2	0.0971574
Rbm19	0.246757	4930547C10Rik	1.16662	Megf9	0.132461	Cog8	0.98	Tmprss4	0.0971275
Xdh	0.246512	Itgal	1.16662	Dhx36	0.132388	Pgr	0.98	Casc5	0.0970668
Exosc8	0.246464	Klri2	1.16633	A630089N07Rik	0.132203	Rnf165	0.98	Wasf3	0.0970351
Il17re	0.246352	2900060B14Rik	1.16603	Pnpt1	0.132162	3200001D21Rik	0.98	Ddx3x	0.0970293
Ceacam1	0.246157	Kcne1l	1.16603	Edem3	0.132155	4930448E06Rik	0.98	Cuedc1	0.0970143
Abhd15	0.246099	Olfr545	1.16603	Zbtb20	0.132147	Hsd3b5	0.98	Slc26a2	0.0969639
Zdhhc24	0.245992	Gm10801	1.16562	B3gnt3	0.131994	2310043L19Rik	0.98	Cryl1	0.0969453
Plxna2	0.245587	C630004L07Rik	1.16353	Papolg	0.131806	Trex2	0.98	Rasgrf1	0.0969189
Abhd2	0.245571	Anxa13	1.16333	Rab10	0.131715	Lhfpl2	0.98	C2cd4a	0.0968565
Atp2a3	0.245492	Fn3krp	1.16109	Bbs10	0.131691	Slc6a1	0.98	Syngr1	0.0968111
Tgfb3	0.245335	Ppm1g	1.16066	Gm13791	0.13168	Slc16a13	0.98	Uevld	0.0967578
Glb1	0.245296	Nfix	1.16047	B230354K17Rik	0.131659	2610008G14Rik	0.98	Bdnf	0.0967548
Spata17	0.245269	BC088983	1.16031	Zcchc7	0.13164	Ank2	0.98	Slc44a1	0.0967342
Cdk3-ps	0.24515	Wdr19	1.16013	3830403N18Rik	0.131617	Efcc1	0.98	Arl6ip4	0.0967179
Lox	0.245057	Tcerg1	1.15971	Zfand6	0.131605	Barhl1	0.98	Farp1	0.0966943
Gm5617	0.244815	Rnf165	1.15968	Tmem47	0.131583	Kcnj14	0.98	Ptprn2	0.0966636
Immp1l	0.244805	Gipc1	1.15889	Zc2hc1a	0.131558	Pvalb	0.98	1600027N09Rik	0.0966548
Gm20337	0.244789	Cbx1	1.15866	Scoc	0.131522	Mfn2	0.98	Stx1a	0.0966378
Ralgds	0.24462	St3gal4	1.15799	Cyp51	0.131354	Rnf182	0.97	Fbxo30	0.0966126
Hn1	0.244517	C2cd3	1.15761	Cenpp	0.131339	Gpa33	0.97	Pls1	0.0965863
Ttr	0.244504	Taf9	1.15722	Vsig10l	0.131299	Kif11	0.97	Pcif1	0.0965603
BC056474	0.244314	Fbf1	1.15604	Nr2c2	0.131278	Mcm10	0.97	Spred3	0.0965501
Tfb1m	0.244016	Tmem39b	1.15526	Atp11b	0.131267	Itgb6	0.97	Slc22a23	0.0965231
Rpl29	0.243886	Csn3	1.15465	Usp14	0.131237	Gckr	0.97	Mcl1	0.0964095
Ndufa11	0.24385	Htra2	1.15423	Nedd4	0.131211	Mmel1	0.97	Pik3c2g	0.0963866
Gstcd	0.243826	Dzip1	1.153	Zfp426	0.131206	Myocd	0.97	4930539E08Rik	0.0963151
Carhsp1	0.243805	Ino80e	1.15266	Prps1	0.131203	Ube2cbp	0.97	Bbs9	0.0963088
Slc25a39	0.243805	Spaca4	1.15158	Mlh3	0.131159	Myod1	0.97	Mbd5	0.0963059
Sergef	0.243769	9130230L23Rik	1.15142	Il13ra1	0.131124	G6pc	0.97	Gm16039	0.0962443
2700094K13Rik	0.243497	Npm3	1.15071	Bdp1	0.130988	4930562F07Rik	0.97	Irs1	0.0962161
Nudt16	0.243367	Alg8	1.1505	Fcho2	0.130902	Tox2	0.97	Def8	0.0961198
Frrs1	0.243308	Stmn4	1.15	Plekhf1	0.130865	4931406H21Rik	0.97	Bri3bp	0.0960959
Dnajb3	0.243257	Gm960	1.14978	Rybp	0.130799	BC017643	0.97	Epb4.1l4b	0.0960894
Khdrbs2	0.243228	Hp1bp3	1.14756	Mphosph8	0.130712	2410087M07Rik	0.97	4921530L18Rik	0.0959747
Etfb	0.243225	Rimklb	1.14676	Gm31854	0.130693	Cttn	0.97	Gatad2b	0.0959663
Uqcrh	0.24307	Gm10691	1.14624	Chchd7	0.130671	Rgs9bp	0.97	Npm1	0.0959572
Mea1	0.242834	Phf6	1.14567	Snrnp48	0.130629	D13Ertd787e	0.97	Naif1	0.0958594
Sema4b	0.242689	Kbtbd10	1.1456	Ube3a	0.13062	Zer1	0.97	Ndufb8	0.095839
Bloc1s2a	0.242622	Gpr137c	1.14459	Zscan29	0.130576	Mageb16	0.97	Asrgl1	0.0957955
Gm1821	0.242605	Vill	1.144	1700055D18Rik	0.13053	Mmp20	0.97	Pcgf2	0.0957261
2310039H08Rik	0.242602	Raly	1.14387	Usp29	0.130524	Zfp936	0.97	Atp6v1f	0.0955975
Eif3i	0.242602	Tubgcp2	1.14306	Spata1	0.13047	Zfp558	0.97	Naip2	0.0955744
St5	0.242512	Fzd2	1.14208	Kpna1	0.130442	Kcns2	0.97	Klf12	0.0955619
Tmem143	0.24248	Gm1631	1.14101	Card14	0.130366	Pex11g	0.96	Ttyh3	0.0955517
Matk	0.242365	Txn1	1.1409	Ubn2	0.130343	Adam12	0.96	1810008I18Rik	0.0954802
St3gal5	0.24216	Crip2	1.13789	Acbd5	0.130292	Arhgap28	0.96	Arrdc4	0.0954418
Fam173b	0.242034	Trim68	1.13772	Uqcrb	0.130269	Cd96	0.96	Rbm43	0.0953642
Kmo	0.241801	Gpr98	1.13772	Slc35a5	0.130206	Mina	0.96	Msrb2	0.0951254
Serpini1	0.241798	Cbfb	1.13764	Adora2b	0.130162	Polh	0.96	Gdpd1	0.0950207
Ak4	0.241755	Pds5a	1.13709	Shoc2	0.130077	Nfxl1	0.96	Als2	0.0949926
Gm12409	0.241721	Fat3	1.13579	Phf7	0.130031	Gapdhs	0.96	Ascc1	0.0949728
Golt1a	0.241708	Arf6	1.13442	Zmat1	0.129988	Tbx15	0.96	Nxt2	0.0949676
Galnt13	0.2416	Gtf3a	1.13432	Terb1	0.129985	4930404N11Rik	0.96	Slc25a4	0.0949211
Psmb5	0.241549	Cdc42ep4	1.1342	Pten	0.129915	Cryba1	0.96	March9	0.0948673
H6pd	0.241425	Serpinf2	1.1335	Zbtb18	0.129891	6330408A02Rik	0.96	Cdca7l	0.0948551
Ntng1	0.241095	Gm17511	1.13314	Rfx3	0.129876	Igkv1-117	0.96	Tex10	0.0948221
Psmb6	0.241029	Cacna1c	1.13141	Pex5l	0.129818	C430049A07Rik	0.96	Tmem169	0.0948199
Gm5431	0.240959	Ift140	1.1314	Idh1	0.129816	Hoxa9	0.96	8430429K09Rik	0.0948113
Calm3	0.2406	Lsm4	1.13063	Mthfs	0.129772	Klhl35	0.96	Clec1a	0.0947253
Ckmt1	0.240512	Sp2	1.1304	Wdr19	0.129768	Ndp	0.96	Rnf130	0.0946877
Nos1	0.240372	Tgfb3	1.13005	Bambi	0.129676	Ghsr	0.96	Ezh2	0.0946673
Ncor1	0.240226	Gm221	1.12985	Dmxl1	0.129611	Gm33374	0.96	2310015B20Rik	0.0946277
Gpn3	0.240203	Fancc	1.12894	Gm7389	0.1296	6030460B20Rik	0.96	Ubr1	0.0945486
Scg2	0.240166	Dnahc10	1.12871	Rdh12	0.129528	Gm19723	0.96	Bptf	0.0944703
Cd74	0.240102	Plac8	1.12828	Tbc1d19	0.129477	Atp8a1	0.95	Gpr39	0.0944272
9430091E24Rik	0.24006	Tfdp2	1.12815	Akap10	0.129451	Cmtm6	0.95	Gm4925	0.0943939
F2	0.239793	Runx1	1.12794	Gm5904	0.129285	Tpbg	0.95	Cirh1a	0.0943896
Rgs7	0.239585	Mpdz	1.1277	2610002M06Rik	0.129284	Krt15	0.95	Zdhhc16	0.0943878
Tmem218	0.239571	Lrrc49	1.12675	Snap25	0.129112	Gle1	0.95	Meig1	0.0943229
Nipal3	0.239519	C030017K20Rik	1.12634	Washc4	0.129005	Mroh4	0.95	Svop	0.0942401
Klhl29	0.239372	Tcfl5	1.12521	Foxn2	0.128986	Gm13446	0.95	Rsad1	0.0942304
Crispld1	0.239139	Elovl7	1.12471	Slc44a3	0.128882	1700003E16Rik	0.95	Mllt6	0.0941032
Sox30	0.238991	1700019G17Rik	1.12347	R3hdm1	0.128874	Cdh10	0.95	Rhpn2	0.0940897
Cdkl1	0.238911	Anapc7	1.1227	Dynlt3	0.128862	Gm16794	0.95	Ranbp17	0.0940652
Ccng1	0.238775	Msl3	1.12261	Fam92a	0.128835	Slc16a2	0.95	Arid3b	0.094007
Elovl6	0.238771	Acyp1	1.12258	Zfp386	0.12876	4832406H04Rik	0.95	Nrm	0.0939965
Stat5a	0.238602	Rdh11	1.12221	Lacc1	0.128716	1110032A03Rik	0.95	Fitm2	0.0939574
9930014A18Rik	0.238545	Mtf2	1.12214	Lgalsl	0.128692	Pdgfd	0.95	Itpr3	0.0939461
Pla2g7	0.238508	Ntm	1.12161	Snap29	0.128661	Mrpl47	0.95	Ep300	0.0939362
Mnf1	0.23847	Naa40	1.12028	Rad17	0.128659	Sgcd	0.95	Ankrd5	0.093906
Tmem131	0.238326	Trpt1	1.11992	Rsbn1l	0.12864	1700057G04Rik	0.95	Tor2a	0.0938852
Mtx1	0.238202	Egfl7	1.11965	Zfyve9	0.128609	D730005E14Rik	0.95	Gbe1	0.0938805
Iba57	0.23809	Flot2	1.11928	Stag2	0.12853	E230006M18Rik	0.95	Mcm4	0.093853
Uxs1	0.237974	Fbxw17	1.11925	Tiam2	0.128396	1700123M08Rik	0.95	Pola2	0.0936921
Kctd1	0.237883	Apol8	1.11924	Dennd6a	0.128355	4930529I22Rik	0.95	Ndufaf2	0.0936796
Ikzf4	0.237789	Rbmx2	1.11837	Orc2	0.128354	Npr3	0.95	Tmem132a	0.0936696
F830016B08Rik	0.237785	A530098C11Rik	1.11789	Ypel5	0.128302	Dnajb7	0.95	Slc41a2	0.0936429
Pde1c	0.237784	Grk6	1.11771	Trappc2	0.128265	4933431M02Rik	0.95	Mmgt2	0.0936177
Elovl2	0.237645	Cbx3	1.11756	Cpne3	0.12826	Pcsk1	0.94	Cc2d2a	0.0935594
Clec14a	0.237615	Tcirg1	1.1171	Zfp983	0.128163	Mad2l1	0.94	Ccdc28b	0.0935501
Mrps11	0.237324	Smc5	1.11678	Dpy19l4	0.128129	Slc17a9	0.94	Snw1	0.0934968
Heg1	0.23724	Lag3	1.11591	Cyld	0.128075	Avpr2	0.94	Nav2	0.0934922
Upp2	0.237142	Myo5c	1.11547	Gldc	0.128054	Lcp2	0.94	Arsg	0.0934445
Cry2	0.237112	Dab2ip	1.11523	Nampt	0.128043	F10	0.94	Ulk4	0.0933786
Parn	0.237103	Unc13c	1.11374	Cldn34c1	0.128027	Ttc39c	0.94	Phyh	0.0933414
Dennd2d	0.237063	Plat	1.11299	Ugp2	0.127995	Aoc1	0.94	Trpc1	0.0933128
Gpsm2	0.237062	Kif6	1.11206	Clcn3	0.127987	Sh2b1	0.94	Gfod1	0.0932864
[truncated: 18,889 more rows]

## Sheet: B-Gene sets
	Klochendler_CCN1B-GFP_UP	Cruciani_HFD_10D	Goyvaerts_Pregnancy_UP	Dumayne_S961_UP
	Xkr5	Reg2	Cldn8	Mc5r
	C330021F23Rik	Reg3b	Apobec1	Gm35279
	Smtn	Cyp26b1	Itk	Slc25a31
	Iqgap3	Slc15a2	Gdf3	Hmmr
	Arhgef39	Angptl4	Tph2	Gm15446
	Ska1	Reg3d	Car8	Knl1
	Ybx2	Eps8l1	Fmo1	Kif4
	Troap	Slpi	Gas5	Clca3a2
	Aspn	Upk3b	Slc40a1	Kbtbd6
	Ube2c	Adcy1	Zfp931	Exo1
	Clgn	Cpt1a	Fmo4	Mki67
	Aurkb	Inhbb	Fgl2	Xlr4a
	Plk1	Nr4a1	Socs2	Gm3776
	Neil3	Gem	Rbmx2	4930578N18Rik
	Kif18b	Rgn	Lonrf3	Gm42427
	Ankle1	Pdk4	Ivd	Ttk
	Casc5	Hmgcs2	Prlr	Crisp2
	Cdk1	Syce1	Cntn3	Ccdc18
	Espl1	Cd36	Gadd45a	1700003M07Rik
	Top2a	Vsnl1	Aqp4	Ckap2l
	Esco2	Cxcl13	Gpr119	Sod3
	Bub1b	Fabp4	Hsbp1	Lsmem1
	Hmmr	Rgs2	Cish	Ccdc85a
	Fam64a	Npas4	Enpp2	Ccnb2
	Kif4	Igj	Hsd3b2	Gm43457
	Nusap1	BB019430	Acvr1c	Fbxw24
	BC030867	Otof	Gbp8	Gabrp
	Pkn3	Cish	Lsm6	Morc1
	Bub1	Rad51ap2	Lsm6	Cenpf
	Ccnb1	Svopl	Tmem255a	Csmd3
	Mxd3	Mir682	B3galnt1	1810026B05Rik
	Fbxo48	Gadd45b	Cdh7	Aspm
	Kif14	Aqp7	Lrrc55	Gm5148
	Gtse1	Cenpe	Ehhadh	Sgo2a
	Cdca8	Pthlh	Lsm6	Arhgap15
	Cenpf	AF529169	Ly96	Kif11
	Melk	Edn3	Myo3a	Tph1
	Arhgap19	Upp2	Prlr	Cenpe
	Cdc25c	Tacc2	Tnfrsf11b	4930506C21Rik
	Fancd2	Ghrl	Vwa5a	Tpx2
	Sez6	Zdhhc22	B830017H08Rik	Clec12b
	Pbk	Pth1r	Bet1	C4b
	Cenpe	Neto2	Fam69a	Gm47392
	Cdc20	Myc	Gas5	Nek2
	Shcbp1	Nfkbiz	Neb	Gm6444
	Anln	4921507P07Rik	Anp32e	Tlr8
	Cenpi	Acaa2	Nudcd2	Top2a
	Clhc1	Dbp	Snord42b	Gm48857
	Chtf18	Rgs4	Gnb1l	Gm45051
	Kif23	Klhl38	Gnpnat1	4930563E18Rik
	Pif1
	Ndc80
	Sapcd2
	Kifc1
	Cdca3
	Birc5
	Ckap2
	Aspm
	Tpx2
	Ccdc18
	Ckap2l
	Cdca5
	D330045A20Rik
	Kif11
	Nek2
	Ncaph
	Cenpa
	Depdc1a
	Ccna1
	Kif2c
	Spag5
	Ccnb2
	Ccna2
	Mki67
	Gsg2
	Cdca2
	Stmn1
	E2f8
	Cep55
	Cxcr4
	Cks2
	Foxm1
	Mis18bp1
	Dlgap5
	Sgol1
	Ercc6l
	Lrr1
	Oip5
	Kif20b
	Slc9a5
	Spc24
	Rbm44
	Ect2
	Stil
	Rad51l1
	Col2a1
	Sgol2
	Traip
	Asf1b
	Rad51ap1

## Sheet: C-OIO_UP
OIO_250UP
Gm5771
Ms4a1
Mzb1
Fanca
Pou2af1
Slpi
Cyp26b1
Ccnb1
Cd79b
Cenpi
Rorc
Saa3
Uhrf1
Cxcl13
Kif2c
Pole
Cenph
Mcm5
Prss3
Mfi2
Cenpe
2810417H13Rik
Exo1
Slfn9
Nek2
Cdc6
Gtse1
Serpina3f
Aurkb
Mcm10
Slc15a2
Hells
Dtl
Rmi2
Ube2c
Hmmr
Fignl1
Kif18b
Faim3
Gins1
Knstrn
Lcn2
Kif14
Derl3
Sapcd2
Pdyn
Cdk1
Gins2
Cdca5
Fanci
Rad51
Troap
Npas2
Casc5
Fam64a
Ckap2l
Ncapg
Ercc6l
Top2a
Ckap2
Cdc20
Mcm3
Bub1
Rad54l
Cdkn3
Mxd3
Dlgap5
Tpx2
Ncaph
Mki67
Clspn
Birc5
Kif4
Cenpa
Brca1
Cdca8
Sell
Cks2
Ccnb2
Shmt1
Melk
Shcbp1
Cenpf
Hist1h1d
Fkbp11
D430020J02Rik
Kntc1
Esco2
Nuf2
Aspm
Tk1
Tcf19
Ttyh1
Gpx2
Plk1
Asf1b
Angptl4
Ect2
Ovol2
Ttk
Pbk
E2f8
Ppp1r3c
Rad51ap1
Nusap1
Chaf1a
Cry1
1190002F15Rik
Cenpk
Neil3
Creld2
Ccnf
BC051070
Stil
Crybb3
Cdca3
Cdt1
Chaf1b
Gucy2c
Spag5
Cenpm
Kif11
Diap3
Gas2l3
Serpina3g
Siglec1
Kif22
Nsl1
Kif20b
Prc1
Mis18bp1
Arntl
2200002J24Rik
Sgol2
Ccna2
Mcm2
Nrm
Chtf18
Cdca2
Ndc80
Dnase1l3
Oip5
Mms22l
Dapl1
Kif20a
Kifc1
Nfil3
Zwilch
Sdf2l1
Dsn1
Cd22
Cdc45
Bub1b
Spc24
1500017E21Rik
E2f7
Fam111a
Serpina3i
Foxm1
Chek2
Pole2
Kif23
Card11
Atad2
Lonrf3
Anln
Hist1h1e
D730005E14Rik
Aurka
Mlf1ip
Lig1
Espl1
Chek1
Tmem252
Gsdma
Polq
Cdca7
Mcm6
Cdkn1a
Spdl1
Smc2
Trip13
Cenpw
Rrm2
Kif15
Arhgap11a
Serpina3n
Cep55
Ccl28
Vgf
Prr11
Nucb2
Slc17a9
Oas2
Fancd2
Psat1
Tyms
Ncapd2
Gm19461
Cd4
Cenpn
Bard1
Tacc2
Dhfr
Phf19
Palb2
Fam46b
Zbtb16
Brip1
Cks1b
E2f1
Cd37
Gc
Gm4262
Stmn1
Fen1
Dctd
Igj
4931429I11Rik
Rnaseh2c
Gmds
Iqgap3
Wdr62
Parpbp
Serpinb8
Reg2
Yif1b
Cxcl9
Ncapg2
Kifc5b
Mcm7
Hmgb2
Timeless
Racgap1
C330027C09Rik
AI662270
Pdia6
Cish
Mt3
Topbp1
Ube2t
Lyz1
Cep128
Ppp1r17
Mastl
Mboat1
Rac2
H2-Ob
Sp140
Kcnj4
