# Supplementary material
Source: publisher figshare collection journal article supplement (https://diabetesjournals.figshare.com/articles/dataset/_/20425617)
Supplement: Supplementary file 1 [file 1]

## Supplementary Figure S1

A

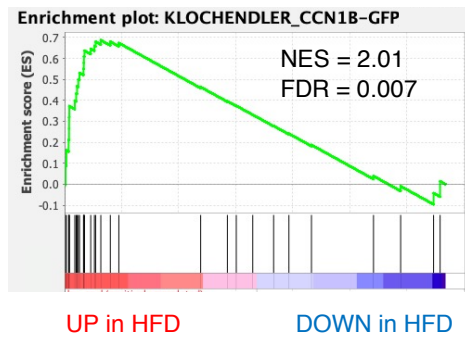

B

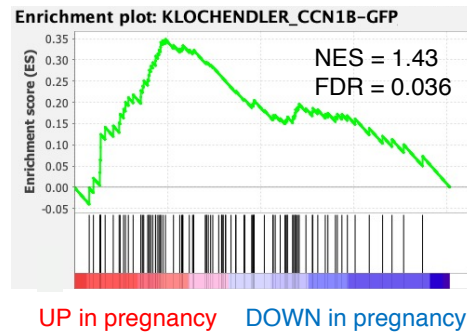

C

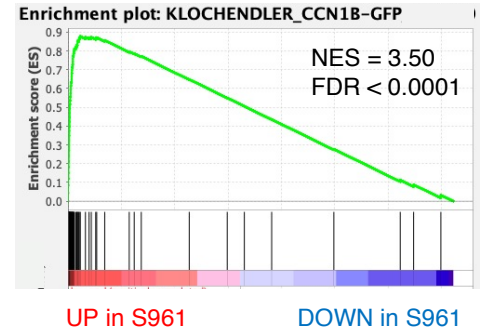

Supplementary Figure S1. Signature of proliferating  $\beta$  cells in other datasets

(A) GSEA plot for upregulated DEGs in sorted proliferating  $\beta$  cells (Klochender et al., 2015), on a ranked list of DEGs from islets isolated from HFD-fed (Cruciani et al., 2017), (B) pregnant (Goyvaerts et al., 2016) or (C) S961-treated mice (Dumayne et al., 2020). NES and q-value as indicated.

Supplementary Figure S2

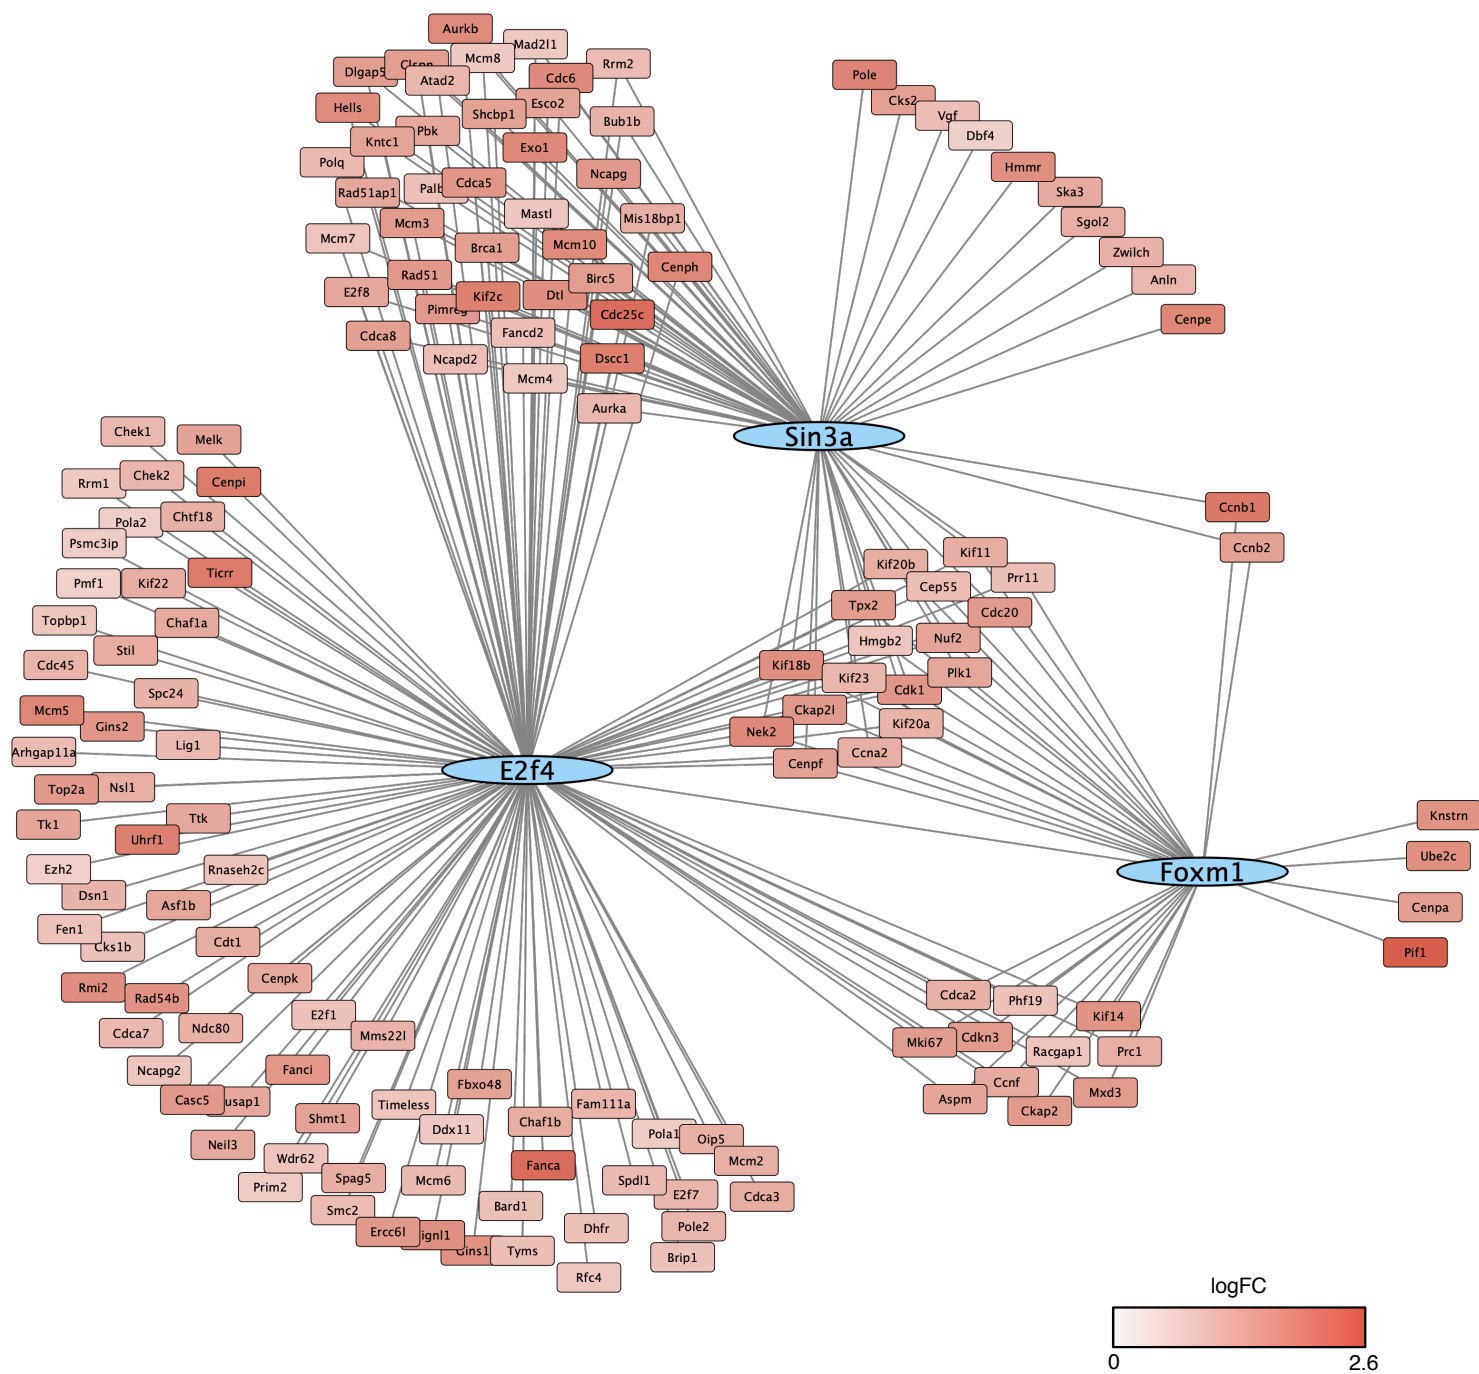

Supplementary Figure 2. Transcription factor enrichment of upregulated DEGs in OIO islets, highlighting networks of genes associated with E2f4, Foxm1 and Sin3a.

Supplementary Figure S3

| Transcription factor enrichment analysis   |         |                         |                                                                      |         |                        |
|--------------------------------------------|---------|-------------------------|----------------------------------------------------------------------|---------|------------------------|
| Sorted proliferating $\beta$ cells (mouse) |         |                         | Islets from cadaveric donors treated with Harmine + LY364947 (human) |         |                        |
| TF                                         | Overlap | Adj. P-value            | TF                                                                   | Overlap | Adj. P-value           |
| E2f4                                       | 147     | $1.06 \times 10^{-147}$ | E2F4                                                                 | 93      | $6.01 \times 10^{-68}$ |
| Foxm1                                      | 42      | $1.59 \times 10^{-53}$  | FOXM1                                                                | 20      | $1.54 \times 10^{-17}$ |
| Sin3a                                      | 83      | $3.65 \times 10^{-40}$  | SIN3A                                                                | 53      | $1.29 \times 10^{-15}$ |
| Klochendler et al., 2015                   |         |                         | Wang et al., 2019                                                    |         |                        |

Supplementary Figure 3. Transcription factor enrichment analyses of the top 250 upregulated DEGs from sorted proliferating  $\beta$  cells (Klochendler et al., 2015) (left), or human islets treated with Harmine + LY364947 (Wang et al., 2019) (right).

## Supplementary Figure 4

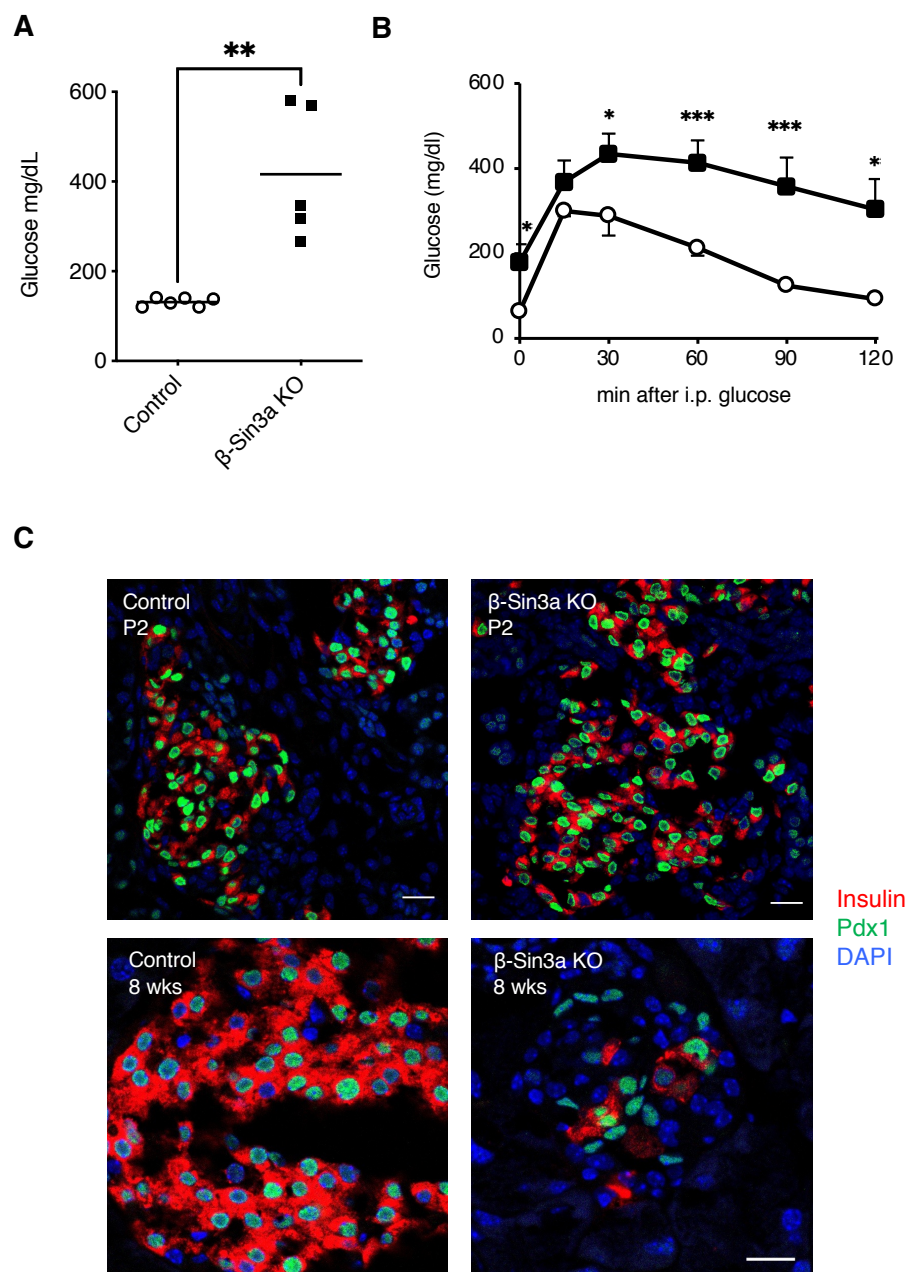

Supplementary Figure 4.

(A) Glucose and insulin levels in 8-week-old female  $\beta$ -Sin3a KO (black squares) and control mice (white circles), after 4h fasting.

(B) Glucose tolerance test in 8-week-old females  $\beta$ -Sin3a KO (black squares) and control mice (white circles).

(C) Representative images Pdx1 and insulin staining in pancreatic sections from  $\beta$ -Sin3a KO, P2 (above) and 8 weeks old mice (below).

Supplementary Figure 5

Sin3a associated genes

|       |        |        |        |          |        |          |
|-------|--------|--------|--------|----------|--------|----------|
| Anln  | Cdc20  | Ckap2l | Fam64a | Kif2c    | Ncapd2 | Rad51    |
| Atad2 | Cdc25c | Cks2   | Fancd2 | Kntc1    | Ncapg  | Rad51ap1 |
| Aurka | Cdc6   | Clspn  | Hells  | Mad2l1   | Nek2   | Rrm2     |
| Aurkb | Cdca5  | Dbf4   | Hmgb2  | Mastl    | Nuf2   | Sgol2    |
| Birc5 | Cdca8  | Dlgap5 | Hmmr   | Mcm10    | Palb2  | Shcbp1   |
| Brca1 | Cdk1   | Dscc1  | Kif11  | Mcm3     | Pbk    | Ska3     |
| Bub1b | Cenpe  | Dtl    | Kif18b | Mcm4     | Plk1   | Tpx2     |
| Ccna2 | Cenpf  | E2f8   | Kif20a | Mcm7     | Pole   | Vgf      |
| Ccnb1 | Cenph  | Esco2  | Kif20b | Mcm8     | Polq   | Zwilch   |
| Ccnb2 | Cep55  | Exo1   | Kif23  | Mis18bp1 | Prr11  |          |

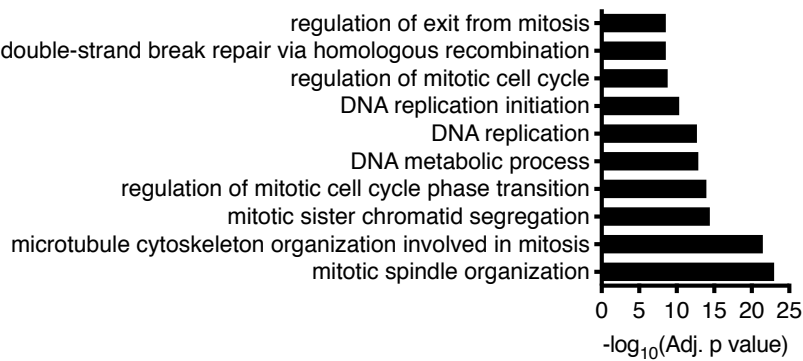

Supplementary Figure 5. All Sin3a-associated genes retrieved from the top 250 upregulated DEGs in OIO islets (left), and GO Biological Processes associated with Sin3a-associated DEGs
